# Supplementary material for: Cryptic U2-dependent Pre-mRNASplice Site Usage Induced by Splice Switching Antisense Oligonucleotides
Source: Research Square preprint supplement (doi:10.21203/rs.3.rs-144809/v1), 2021-01-18
Supplement: Supplementary file 1 [file b3feb393407c8239eb4e01c7.xlsx]

## Sheet: Sheet1
	Cryptic U2-dependent pre-mRNA splice site usage induced by splice switching antisense oligonucleotides
	Kristin A. Ham1,2¶, Niall P. Keegan1,2¶, Craig S. McIntosh1,2, May T. Aung-Htut1,2, Khine Zaw1-3, Kane Greer1,2, Sue Fletcher1,2 and Steve D. Wilton1,2*
1	Centre for Molecular Medicine and Innovative Therapeutics, Health Futures Institute, Murdoch University, Perth, Western Australia, 6150, Australia
2	Perron Institute for Neurological and Translational Science, Centre for Neuromuscular and Neurological Disorders, The University of Western Australia, Perth, Western Australia, 6009, Australia
3	Department of Biochemistry, Faculty of Medicine Siriraj Hospital, Mahidol University, Bangkok, 10700, Thailand
*	corresponding author s.wilton@murdoch.edu.au
¶	these authors contributed equally to this work

## Sheet: COL7A1 e15 - 2ry Str + Mask
Structure 1 (no AO)	Structure 2 (H15A(+91+115))	H15A(+91+115) Mask	Structure 2 + Mask
.....(((((..(((..(((.((((..((((((.((((((.(((.....(((...........(((...))).............................((((.(((((.(((................((((((.........)))))).............)))...))))))))).........)))..........................)))))))))...)))))))))).))).)))..))))).............................	.....(((((..((((.(((.((((..((((((.((((((.(((...((.........((((((((...)))).))))...............................................................(((.....))).............................................................))...)))))))))...)))))))))).)))))))..))))).............................	................................................................................................................................................................xxxxxxxxxxxxxxxxxxxxxxxxx...................................................................................................	.....(((((..((((.(((.((((..((((((.((((((.(((...((.........((((((((...)))).))))...............................................................(((.....)))........|||||||||||||||||||||||||............................))...)))))))))...)))))))))).)))))))..)))))............................

## Sheet: COL7A1 e15 - HSF3.0
Name	Seq	Score	Pos	Start	Len	S+L	ESE Frac	ESS Frac	S1 Struc	S1 Score	S2 Struc	S2 Score	∆ Score	Name	Type	ESE Score	ESS Scores
{"name": "Sironi_motif3 (ESS Site)"	sequence: "TTTCCCTC"	CV: "79.66"	position: "4"}	54	8	62	0	-0.125	........	1	.....(((	0.625	-0.375	Sironi_motif3	ESS	0	-0.375
{"name": "Sironi_motif3 (ESS Site)"	sequence: "CCTCTGAC"	CV: "61.45"	position: "8"}	58	8	66	0	-0.125	......((	0.75	.(((((((	0.125	-0.625	Sironi_motif3	ESS	0	-0.625
{"name": "PESE (ESE Site)"	sequence: "TCTGACCT"	CV: "27.66208072203"	position: "10"}	60	8	68	0.125	0	....(((.	0.625	(((((((.	0.125	-0.5	PESE	ESE	-0.5	0
{"name": "EIE (ESE Site)"	sequence: "CTGACC"	CV: "NA"	position: "11"}	61	6	67	0.166667	0	...(((	0.5	((((((	0	-0.5	EIE	ESE	-0.5	0
{"name": "ESE_ASF (ESE Site)"	sequence: "CTGACCT"	CV: "75.4"	position: "11"}	61	7	68	0.142857	0	...(((.	0.571429	((((((.	0.142857	-0.428571	ESE_ASF	ESE	-0.428571	0
{"name": "ESE_ASFB (ESE Site)"	sequence: "CTGACCT"	CV: "76.92"	position: "11"}	61	7	68	0.142857	0	...(((.	0.571429	((((((.	0.142857	-0.428571	ESE_ASFB	ESE	-0.428571	0
{"name": "EIE (ESE Site)"	sequence: "TGACCT"	CV: "NA"	position: "12"}	62	6	68	0.166667	0	..(((.	0.5	(((((.	0.166667	-0.333333	EIE	ESE	-0.333333	0
{"name": "IIE (ESS Site)"	sequence: "TGACCT"	CV: "NA"	position: "12"}	62	6	68	0	-0.166667	..(((.	0.5	(((((.	0.166667	-0.333333	IIE	ESS	0	-0.333333
{"name": "EIE (ESE Site)"	sequence: "GACCTC"	CV: "NA"	position: "13"}	63	6	69	0.166667	0	.(((..	0.5	((((..	0.333333	-0.166667	EIE	ESE	-0.166667	0
{"name": "ESE_SC35 (ESE Site)"	sequence: "GACCTCAG"	CV: "86.43"	position: "13"}	63	8	71	0.125	0	.(((...)	0.5	((((...)	0.375	-0.125	ESE_SC35	ESE	-0.125	0
{"name": "EIE (ESE Site)"	sequence: "ACCTCA"	CV: "NA"	position: "14"}	64	6	70	0.166667	0	(((...	0.5	(((...	0.5	0	EIE	ESE	0	0
{"name": "ESE_SRp40 (ESE Site)"	sequence: "CCTCAGG"	CV: "91.46"	position: "15"}	65	7	72	0.142857	0	((...))	0.428571	((...))	0.428571	0	ESE_SRp40	ESE	0	0
{"name": "Sironi_motif1 (ESS Site)"	sequence: "CCTCAGGT"	CV: "64.47"	position: "15"}	65	8	73	0	-0.125	((...)))	0.375	((...)))	0.375	0	Sironi_motif1	ESS	0	0
{"name": "ESE_ASF (ESE Site)"	sequence: "CTCAGGT"	CV: "88.27"	position: "16"}	66	7	73	0.142857	0	(...)))	0.428571	(...)))	0.428571	0	ESE_ASF	ESE	0	0
{"name": "ESE_ASFB (ESE Site)"	sequence: "CTCAGGT"	CV: "90.92"	position: "16"}	66	7	73	0.142857	0	(...)))	0.428571	(...)))	0.428571	0	ESE_ASFB	ESE	0	0
{"name": "ESS_hnRNPA1 (ESS Site)"	sequence: "CAGGTC"	CV: "71.55"	position: "18"}	68	6	74	0	-0.166667	..))).	0.5	..))))	0.333333	-0.166667	ESS_hnRNPA1	ESS	0	-0.166667
{"name": "Sironi_motif2 (ESS Site)"	sequence: "GGTCCGG"	CV: "65.36"	position: "20"}	70	7	77	0	-0.142857	)))....	0.571429	)))).))	0.142857	-0.428571	Sironi_motif2	ESS	0	-0.428571
{"name": "ESE_ASF (ESE Site)"	sequence: "GTCCGGA"	CV: "75.34"	position: "21"}	71	7	78	0.142857	0	)).....	0.714286	))).)))	0.142857	-0.571429	ESE_ASF	ESE	-0.571429	0
{"name": "ESE_SC35 (ESE Site)"	sequence: "GTCCGGAG"	CV: "78.25"	position: "21"}	71	8	79	0.125	0	))......	0.75	))).))))	0.125	-0.625	ESE_SC35	ESE	-0.625	0
{"name": "ESE_SRp55 (ESE Site)"	sequence: "TCCGGA"	CV: "74.03"	position: "22"}	72	6	78	0.166667	0	).....	0.833333	)).)))	0.166667	-0.666667	ESE_SRp55	ESE	-0.666667	0
{"name": "Sironi_motif1 (ESS Site)"	sequence: "CCGGAGTC"	CV: "61.34"	position: "23"}	73	8	81	0	-0.125	........	1	).))))..	0.375	-0.625	Sironi_motif1	ESS	0	-0.625
{"name": "ESE_ASFB (ESE Site)"	sequence: "CGGAGTC"	CV: "72.46"	position: "24"}	74	7	81	0.142857	0	.......	1	.))))..	0.428571	-0.571429	ESE_ASFB	ESE	-0.571429	0
{"name": "ESE_9G8 (ESE Site)"	sequence: "GGAGTC"	CV: "67.52"	position: "25"}	75	6	81	0.166667	0	......	1	))))..	0.333333	-0.666667	ESE_9G8	ESE	-0.666667	0
{"name": "ESE_SC35 (ESE Site)"	sequence: "GAGTCCAG"	CV: "75.49"	position: "26"}	76	8	84	0.125	0	........	1	))).....	0.625	-0.375	ESE_SC35	ESE	-0.375	0
{"name": "Sironi_motif3 (ESS Site)"	sequence: "CCAGCCAG"	CV: "62.88"	position: "30"}	80	8	88	0	-0.125	........	1	........	1	0	Sironi_motif3	ESS	0	0
{"name": "ESE_ASF (ESE Site)"	sequence: "CAGCCAG"	CV: "73.94"	position: "31"}	81	7	88	0.142857	0	.......	1	.......	1	0	ESE_ASF	ESE	0	0
{"name": "ESE_ASFB (ESE Site)"	sequence: "CAGCCAG"	CV: "74.54"	position: "31"}	81	7	88	0.142857	0	.......	1	.......	1	0	ESE_ASFB	ESE	0	0
{"name": "EIE (ESE Site)"	sequence: "GCCAGA"	CV: "NA"	position: "33"}	83	6	89	0.166667	0	......	1	......	1	0	EIE	ESE	0	0
{"name": "ESE_9G8 (ESE Site)"	sequence: "CCAGAC"	CV: "63.29"	position: "34"}	84	6	90	0.166667	0	......	1	......	1	0	ESE_9G8	ESE	0	0
{"name": "EIE (ESE Site)"	sequence: "CCAGAC"	CV: "NA"	position: "34"}	84	6	90	0.166667	0	......	1	......	1	0	EIE	ESE	0	0
{"name": "Sironi_motif1 (ESS Site)"	sequence: "CCAGACAC"	CV: "60.83"	position: "34"}	84	8	92	0	-0.125	........	1	........	1	0	Sironi_motif1	ESS	0	0
{"name": "EIE (ESE Site)"	sequence: "CAGACA"	CV: "NA"	position: "35"}	85	6	91	0.166667	0	......	1	......	1	0	EIE	ESE	0	0
{"name": "ESE_SC35 (ESE Site)"	sequence: "AGACACTG"	CV: "79.73"	position: "36"}	86	8	94	0.125	0	........	1	........	1	0	ESE_SC35	ESE	0	0
{"name": "ESE_ASF (ESE Site)"	sequence: "GACACTG"	CV: "74.58"	position: "37"}	87	7	94	0.142857	0	.......	1	.......	1	0	ESE_ASF	ESE	0	0
{"name": "ESE_SRp40 (ESE Site)"	sequence: "ACACTGC"	CV: "87.03"	position: "38"}	88	7	95	0.142857	0	.......	1	.......	1	0	ESE_SRp40	ESE	0	0
{"name": "Sironi_motif3 (ESS Site)"	sequence: "ACTGCCCC"	CV: "64.67"	position: "40"}	90	8	98	0	-0.125	........	1	........	1	0	Sironi_motif3	ESS	0	0
{"name": "EIE (ESE Site)"	sequence: "CTGCCC"	CV: "NA"	position: "41"}	91	6	97	0.166667	0	......	1	......	1	0	EIE	ESE	0	0
{"name": "EIE (ESE Site)"	sequence: "TGCCCC"	CV: "NA"	position: "42"}	92	6	98	0.166667	0	......	1	......	1	0	EIE	ESE	0	0
{"name": "ESE_SC35 (ESE Site)"	sequence: "TGCCCCCA"	CV: "80.28"	position: "42"}	92	8	100	0.125	0	........	1	........	1	0	ESE_SC35	ESE	0	0
{"name": "Sironi_motif3 (ESS Site)"	sequence: "TGCCCCCA"	CV: "64.15"	position: "42"}	92	8	100	0	-0.125	........	1	........	1	0	Sironi_motif3	ESS	0	0
{"name": "EIE (ESE Site)"	sequence: "GCCCCC"	CV: "NA"	position: "43"}	93	6	99	0.166667	0	......	1	......	1	0	EIE	ESE	0	0
{"name": "ESE_SC35 (ESE Site)"	sequence: "GCCCCCAG"	CV: "80.84"	position: "43"}	93	8	101	0.125	0	........	1	........	1	0	ESE_SC35	ESE	0	0
{"name": "Sironi_motif3 (ESS Site)"	sequence: "GCCCCCAG"	CV: "78.49"	position: "43"}	93	8	101	0	-0.125	........	1	........	1	0	Sironi_motif3	ESS	0	0
{"name": "EIE (ESE Site)"	sequence: "CCCCCA"	CV: "NA"	position: "44"}	94	6	100	0.166667	0	......	1	......	1	0	EIE	ESE	0	0
{"name": "ESE_ASFB (ESE Site)"	sequence: "CCCCCAG"	CV: "72.23"	position: "44"}	94	7	101	0.142857	0	.......	1	.......	1	0	ESE_ASFB	ESE	0	0
{"name": "EIE (ESE Site)"	sequence: "CCCCAG"	CV: "NA"	position: "45"}	95	6	101	0.166667	0	......	1	......	1	0	EIE	ESE	0	0
{"name": "ESE_ASFB (ESE Site)"	sequence: "CCCCAGA"	CV: "74.54"	position: "45"}	95	7	102	0.142857	0	.......	1	.......	1	0	ESE_ASFB	ESE	0	0
{"name": "EIE (ESE Site)"	sequence: "CCCAGA"	CV: "NA"	position: "46"}	96	6	102	0.166667	0	......	1	......	1	0	EIE	ESE	0	0
{"name": "ESE_9G8 (ESE Site)"	sequence: "CCAGAC"	CV: "63.29"	position: "47"}	97	6	103	0.166667	0	.....(	0.833333	......	1	0.166667	ESE_9G8	ESE	0.166667	0
{"name": "EIE (ESE Site)"	sequence: "CCAGAC"	CV: "NA"	position: "47"}	97	6	103	0.166667	0	.....(	0.833333	......	1	0.166667	EIE	ESE	0.166667	0
{"name": "Sironi_motif1 (ESS Site)"	sequence: "CCAGACTC"	CV: "60.04"	position: "47"}	97	8	105	0	-0.125	.....(((	0.625	........	1	0.375	Sironi_motif1	ESS	0	0.375
{"name": "ESE_ASF (ESE Site)"	sequence: "CAGACTC"	CV: "73.76"	position: "48"}	98	7	105	0.142857	0	....(((	0.571429	.......	1	0.428571	ESE_ASF	ESE	0.428571	0
{"name": "ESE_ASFB (ESE Site)"	sequence: "CAGACTC"	CV: "71.85"	position: "48"}	98	7	105	0.142857	0	....(((	0.571429	.......	1	0.428571	ESE_ASFB	ESE	0.428571	0
{"name": "ESE_SC35 (ESE Site)"	sequence: "AGACTCTA"	CV: "75.18"	position: "49"}	99	8	107	0.125	0	...((((.	0.5	........	1	0.5	ESE_SC35	ESE	0.5	0
{"name": "EIE (ESE Site)"	sequence: "ACTCTA"	CV: "NA"	position: "51"}	101	6	107	0.166667	0	.((((.	0.333333	......	1	0.666667	EIE	ESE	0.666667	0
{"name": "EIE (ESE Site)"	sequence: "CTCTAC"	CV: "NA"	position: "52"}	102	6	108	0.166667	0	((((.(	0.166667	......	1	0.833333	EIE	ESE	0.833333	0
{"name": "ESE_SC35 (ESE Site)"	sequence: "CTCTACTG"	CV: "78.81"	position: "52"}	102	8	110	0.125	0	((((.(((	0.125	........	1	0.875	ESE_SC35	ESE	0.875	0
{"name": "EIE (ESE Site)"	sequence: "TCTACT"	CV: "NA"	position: "53"}	103	6	109	0.166667	0	(((.((	0.166667	......	1	0.833333	EIE	ESE	0.833333	0
{"name": "EIE (ESE Site)"	sequence: "CTACTG"	CV: "NA"	position: "54"}	104	6	110	0.166667	0	((.(((	0.166667	......	1	0.833333	EIE	ESE	0.833333	0
{"name": "ESE_SRp40 (ESE Site)"	sequence: "CTACTGC"	CV: "89.31"	position: "54"}	104	7	111	0.142857	0	((.((((	0.142857	.......	1	0.857143	ESE_SRp40	ESE	0.857143	0
{"name": "Sironi_motif3 (ESS Site)"	sequence: "ACTGCCAC"	CV: "75.78"	position: "56"}	106	8	114	0	-0.125	.(((((.(	0.25	........	1	0.75	Sironi_motif3	ESS	0	0.75
{"name": "PESE (ESE Site)"	sequence: "CTGCCACA"	CV: "27.84997034413"	position: "57"}	107	8	115	0.125	0	(((((.((	0.125	........	1	0.875	PESE	ESE	0.875	0
{"name": "ESE_SC35 (ESE Site)"	sequence: "TGCCACAG"	CV: "77.82"	position: "58"}	108	8	116	0.125	0	((((.(((	0.125	........	1	0.875	ESE_SC35	ESE	0.875	0
{"name": "ESE_SRp40 (ESE Site)"	sequence: "CCACAGA"	CV: "83.5"	position: "60"}	110	7	117	0.142857	0	((.(((.	0.285714	.......	1	0.714286	ESE_SRp40	ESE	0.714286	0
{"name": "Sironi_motif1 (ESS Site)"	sequence: "CCACAGAC"	CV: "60.83"	position: "60"}	110	8	118	0	-0.125	((.(((..	0.375	........	1	0.625	Sironi_motif1	ESS	0	0.625
{"name": "ESE_SRp55 (ESE Site)"	sequence: "CACAGA"	CV: "75.63"	position: "61"}	111	6	117	0.166667	0	(.(((.	0.333333	......	1	0.666667	ESE_SRp55	ESE	0.666667	0
{"name": "ESE_ASFB (ESE Site)"	sequence: "CACAGAC"	CV: "71.38"	position: "61"}	111	7	118	0.142857	0	(.(((..	0.428571	.......	1	0.571429	ESE_ASFB	ESE	0.571429	0
{"name": "PESS (ESS Site)"	sequence: "CACAGACA"	CV: "-29.39041638497"	position: "61"}	111	8	119	0	-0.125	(.(((...	0.5	........	1	0.5	PESS	ESS	0	0.5
{"name": "ESE_9G8 (ESE Site)"	sequence: "ACAGAC"	CV: "60.88"	position: "62"}	112	6	118	0.166667	0	.(((..	0.5	......	1	0.5	ESE_9G8	ESE	0.5	0
{"name": "EIE (ESE Site)"	sequence: "ACAGAC"	CV: "NA"	position: "62"}	112	6	118	0.166667	0	.(((..	0.5	......	1	0.5	EIE	ESE	0.5	0
{"name": "Sironi_motif1 (ESS Site)"	sequence: "ACAGACAT"	CV: "60.5"	position: "62"}	112	8	120	0	-0.125	.(((....	0.625	........	1	0.375	Sironi_motif1	ESS	0	0.375
{"name": "EIE (ESE Site)"	sequence: "CAGACA"	CV: "NA"	position: "63"}	113	6	119	0.166667	0	(((...	0.5	......	1	0.5	EIE	ESE	0.5	0
{"name": "ESE_ASF (ESE Site)"	sequence: "CAGACAT"	CV: "81.92"	position: "63"}	113	7	120	0.142857	0	(((....	0.571429	.......	1	0.428571	ESE_ASF	ESE	0.428571	0
{"name": "ESE_ASFB (ESE Site)"	sequence: "CAGACAT"	CV: "79.23"	position: "63"}	113	7	120	0.142857	0	(((....	0.571429	.......	1	0.428571	ESE_ASFB	ESE	0.428571	0
{"name": "RESCUE ESE (ESE Site)"	sequence: "AGACAT"	CV: "NA"	position: "64"}	114	6	120	0.166667	0	((....	0.666667	......	1	0.333333	RESCUE ESE	ESE	0.333333	0
{"name": "EIE (ESE Site)"	sequence: "AGACAT"	CV: "NA"	position: "64"}	114	6	120	0.166667	0	((....	0.666667	......	1	0.333333	EIE	ESE	0.333333	0
{"name": "PESE (ESE Site)"	sequence: "AGACATCA"	CV: "28.36967386841"	position: "64"}	114	8	122	0.125	0	((......	0.75	........	1	0.25	PESE	ESE	0.25	0
{"name": "ESE_9G8 (ESE Site)"	sequence: "GACATC"	CV: "59.27"	position: "65"}	115	6	121	0.166667	0	(.....	0.833333	......	1	0.166667	ESE_9G8	ESE	0.166667	0
{"name": "EIE (ESE Site)"	sequence: "GACATC"	CV: "NA"	position: "65"}	115	6	121	0.166667	0	(.....	0.833333	......	1	0.166667	EIE	ESE	0.166667	0
{"name": "EIE (ESE Site)"	sequence: "ACATCA"	CV: "NA"	position: "66"}	116	6	122	0.166667	0	......	1	......	1	0	EIE	ESE	0	0
{"name": "Sironi_motif3 (ESS Site)"	sequence: "CATCACAG"	CV: "64.76"	position: "67"}	117	8	125	0	-0.125	........	1	........	1	0	Sironi_motif3	ESS	0	0
{"name": "ESE_SRp40 (ESE Site)"	sequence: "TCACAGG"	CV: "99.9"	position: "69"}	119	7	126	0.142857	0	.......	1	.......	1	0	ESE_SRp40	ESE	0	0
{"name": "Sironi_motif1 (ESS Site)"	sequence: "TCACAGGG"	CV: "62.01"	position: "69"}	119	8	127	0	-0.125	........	1	........	1	0	Sironi_motif1	ESS	0	0
{"name": "ESE_ASF (ESE Site)"	sequence: "CACAGGG"	CV: "92.58"	position: "70"}	120	7	127	0.142857	0	.......	1	.......	1	0	ESE_ASF	ESE	0	0
{"name": "ESE_ASFB (ESE Site)"	sequence: "CACAGGG"	CV: "92.69"	position: "70"}	120	7	127	0.142857	0	.......	1	.......	1	0	ESE_ASFB	ESE	0	0
{"name": "Sironi_motif2 (ESS Site)"	sequence: "ACAGGGC"	CV: "63.68"	position: "71"}	121	7	128	0	-0.142857	.......	1	.......	1	0	Sironi_motif2	ESS	0	0
{"name": "Sironi_motif1 (ESS Site)"	sequence: "ACAGGGCT"	CV: "65.6"	position: "71"}	121	8	129	0	-0.125	........	1	........	1	0	Sironi_motif1	ESS	0	0
{"name": "ESE_9G8 (ESE Site)"	sequence: "CAGGGC"	CV: "59.67"	position: "72"}	122	6	128	0.166667	0	......	1	......	1	0	ESE_9G8	ESE	0	0
{"name": "ESS_hnRNPA1 (ESS Site)"	sequence: "CAGGGC"	CV: "83.22"	position: "72"}	122	6	128	0	-0.166667	......	1	......	1	0	ESS_hnRNPA1	ESS	0	0
{"name": "IIE (ESS Site)"	sequence: "GGGCTG"	CV: "NA"	position: "74"}	124	6	130	0	-0.166667	......	1	......	1	0	IIE	ESS	0	0
{"name": "ESE_SC35 (ESE Site)"	sequence: "GGCTGCAG"	CV: "86.43"	position: "75"}	125	8	133	0.125	0	.......(	0.875	........	1	0.125	ESE_SC35	ESE	0.125	0
{"name": "ESE_SRp55 (ESE Site)"	sequence: "TGCAGC"	CV: "87.22"	position: "78"}	128	6	134	0.166667	0	....((	0.666667	......	1	0.333333	ESE_SRp55	ESE	0.333333	0
{"name": "ESE_9G8 (ESE Site)"	sequence: "GCAGCC"	CV: "63.23"	position: "79"}	129	6	135	0.166667	0	...(((	0.5	......	1	0.5	ESE_9G8	ESE	0.5	0
{"name": "EIE (ESE Site)"	sequence: "CAGCCT"	CV: "NA"	position: "80"}	130	6	136	0.166667	0	..((((	0.333333	......	1	0.666667	EIE	ESE	0.666667	0
{"name": "ESE_ASF (ESE Site)"	sequence: "CAGCCTG"	CV: "76.56"	position: "80"}	130	7	137	0.142857	0	..(((((	0.285714	.......	1	0.714286	ESE_ASF	ESE	0.714286	0
{"name": "ESE_ASFB (ESE Site)"	sequence: "CAGCCTG"	CV: "76.31"	position: "80"}	130	7	137	0.142857	0	..(((((	0.285714	.......	1	0.714286	ESE_ASFB	ESE	0.714286	0
{"name": "EIE (ESE Site)"	sequence: "AGCCTG"	CV: "NA"	position: "81"}	131	6	137	0.166667	0	.(((((	0.166667	......	1	0.833333	EIE	ESE	0.833333	0
{"name": "PESE (ESE Site)"	sequence: "AGCCTGGA"	CV: "30.49411237707"	position: "81"}	131	8	139	0.125	0	.((((((.	0.25	........	1	0.75	PESE	ESE	0.75	0
{"name": "EIE (ESE Site)"	sequence: "GCCTGG"	CV: "NA"	position: "82"}	132	6	138	0.166667	0	((((((	0	......	1	1	EIE	ESE	1	0
{"name": "PESE (ESE Site)"	sequence: "GCCTGGAA"	CV: "29.30414477041"	position: "82"}	132	8	140	0.125	0	((((((..	0.25	........	1	0.75	PESE	ESE	0.75	0
{"name": "EIE (ESE Site)"	sequence: "CCTGGA"	CV: "NA"	position: "83"}	133	6	139	0.166667	0	(((((.	0.166667	......	1	0.833333	EIE	ESE	0.833333	0
{"name": "PESE (ESE Site)"	sequence: "CCTGGAAC"	CV: "44.5464311341"	position: "83"}	133	8	141	0.125	0	(((((...	0.375	........	1	0.625	PESE	ESE	0.625	0
{"name": "EIE (ESE Site)"	sequence: "CTGGAA"	CV: "NA"	position: "84"}	134	6	140	0.166667	0	((((..	0.333333	......	1	0.666667	EIE	ESE	0.666667	0
{"name": "RESCUE ESE (ESE Site)"	sequence: "TGGAAC"	CV: "NA"	position: "85"}	135	6	141	0.166667	0	(((...	0.5	......	1	0.5	RESCUE ESE	ESE	0.5	0
{"name": "EIE (ESE Site)"	sequence: "TGGAAC"	CV: "NA"	position: "85"}	135	6	141	0.166667	0	(((...	0.5	......	1	0.5	EIE	ESE	0.5	0
{"name": "EIE (ESE Site)"	sequence: "GGAACC"	CV: "NA"	position: "86"}	136	6	142	0.166667	0	((....	0.666667	......	1	0.333333	EIE	ESE	0.333333	0
{"name": "RESCUE ESE (ESE Site)"	sequence: "GAACCA"	CV: "NA"	position: "87"}	137	6	143	0.166667	0	(.....	0.833333	.....(	0.833333	0	RESCUE ESE	ESE	0	0
{"name": "EIE (ESE Site)"	sequence: "GAACCA"	CV: "NA"	position: "87"}	137	6	143	0.166667	0	(.....	0.833333	.....(	0.833333	0	EIE	ESE	0	0
{"name": "EIE (ESE Site)"	sequence: "ACCACC"	CV: "NA"	position: "89"}	139	6	145	0.166667	0	......	1	...(((	0.5	-0.5	EIE	ESE	-0.5	0
{"name": "Sironi_motif3 (ESS Site)"	sequence: "CCACCTAC"	CV: "63.3"	position: "90"}	140	8	148	0	-0.125	.......)	0.875	..(((...	0.625	-0.25	Sironi_motif3	ESS	0	-0.25
{"name": "EIE (ESE Site)"	sequence: "CACCTA"	CV: "NA"	position: "91"}	141	6	147	0.166667	0	......	1	.(((..	0.5	-0.5	EIE	ESE	-0.5	0
{"name": "EIE (ESE Site)"	sequence: "ACCTAC"	CV: "NA"	position: "92"}	142	6	148	0.166667	0	.....)	0.833333	(((...	0.5	-0.333333	EIE	ESE	-0.333333	0
{"name": "EIE (ESE Site)"	sequence: "CCTACC"	CV: "NA"	position: "93"}	143	6	149	0.166667	0	....))	0.666667	((....	0.666667	0	EIE	ESE	0	0
{"name": "Sironi_motif3 (ESS Site)"	sequence: "CCTACCAG"	CV: "78.21"	position: "93"}	143	8	151	0	-0.125	....))))	0.5	((.....)	0.625	0.125	Sironi_motif3	ESS	0	0.125
{"name": "EIE (ESE Site)"	sequence: "CTACCA"	CV: "NA"	position: "94"}	144	6	150	0.166667	0	...)))	0.5	(.....	0.833333	0.333333	EIE	ESE	0.333333	0
{"name": "ESE_SRp40 (ESE Site)"	sequence: "CTACCAG"	CV: "82.06"	position: "94"}	144	7	151	0.142857	0	...))))	0.428571	(.....)	0.714286	0.285714	ESE_SRp40	ESE	0.285714	0
{"name": "EIE (ESE Site)"	sequence: "TACCAG"	CV: "NA"	position: "95"}	145	6	151	0.166667	0	..))))	0.333333	.....)	0.833333	0.5	EIE	ESE	0.5	0
{"name": "ESS_hnRNPA1 (ESS Site)"	sequence: "CAGGTG"	CV: "70.6"	position: "98"}	148	6	154	0	-0.166667	))))).	0.166667	..))).	0.5	0.333333	ESS_hnRNPA1	ESS	0	0.333333
{"name": "Sironi_motif1 (ESS Site)"	sequence: "CAGGTGGC"	CV: "61.49"	position: "98"}	148	8	156	0	-0.125	)))))...	0.375	..)))...	0.625	0.25	Sironi_motif1	ESS	0	0.25
{"name": "IIE (ESS Site)"	sequence: "AGGTGG"	CV: "NA"	position: "99"}	149	6	155	0	-0.166667	))))..	0.333333	.)))..	0.5	0.166667	IIE	ESS	0	0.166667
{"name": "Fas ESS (ESS Site)"	sequence: "AGGTGG"	CV: "NA"	position: "99"}	149	6	155	0	-0.166667	))))..	0.333333	.)))..	0.5	0.166667	Fas ESS	ESS	0	0.166667
{"name": "Sironi_motif2 (ESS Site)"	sequence: "AGGTGGC"	CV: "63.13"	position: "99"}	149	7	156	0	-0.142857	))))...	0.428571	.)))...	0.571429	0.142857	Sironi_motif2	ESS	0	0.142857
{"name": "ESE_9G8 (ESE Site)"	sequence: "GGTGGC"	CV: "66.72"	position: "100"}	150	6	156	0.166667	0	)))...	0.5	)))...	0.5	0	ESE_9G8	ESE	0	0
{"name": "IIE (ESS Site)"	sequence: "GGTGGC"	CV: "NA"	position: "100"}	150	6	156	0	-0.166667	)))...	0.5	)))...	0.5	0	IIE	ESS	0	0
{"name": "Sironi_motif2 (ESS Site)"	sequence: "GGTGGCT"	CV: "68.45"	position: "100"}	150	7	157	0	-0.142857	)))....	0.571429	)))....	0.571429	0	Sironi_motif2	ESS	0	0
{"name": "IIE (ESS Site)"	sequence: "GTGGCT"	CV: "NA"	position: "101"}	151	6	157	0	-0.166667	))....	0.666667	))....	0.666667	0	IIE	ESS	0	0
{"name": "IIE (ESS Site)"	sequence: "TGGCTG"	CV: "NA"	position: "102"}	152	6	158	0	-0.166667	).....	0.833333	).....	0.833333	0	IIE	ESS	0	0
{"name": "IIE (ESS Site)"	sequence: "GGCTGT"	CV: "NA"	position: "103"}	153	6	159	0	-0.166667	......	1	......	1	0	IIE	ESS	0	0
{"name": "Sironi_motif2 (ESS Site)"	sequence: "GGCTGTG"	CV: "60.01"	position: "103"}	153	7	160	0	-0.142857	.......	1	.......	1	0	Sironi_motif2	ESS	0	0
{"name": "EIE (ESE Site)"	sequence: "GCTGTG"	CV: "NA"	position: "104"}	154	6	160	0.166667	0	......	1	......	1	0	EIE	ESE	0	0
{"name": "IIE (ESS Site)"	sequence: "GCTGTG"	CV: "NA"	position: "104"}	154	6	160	0	-0.166667	......	1	......	1	0	IIE	ESS	0	0
{"name": "IIE (ESS Site)"	sequence: "CTGTGT"	CV: "NA"	position: "105"}	155	6	161	0	-0.166667	......	1	......	1	0	IIE	ESS	0	0
{"name": "ESE_SRp55 (ESE Site)"	sequence: "TGTGTC"	CV: "86.39"	position: "106"}	156	6	162	0.166667	0	......	1	.....|	0.833333	-0.166667	ESE_SRp55	ESE	-0.166667	0
{"name": "IIE (ESS Site)"	sequence: "TGTGTC"	CV: "NA"	position: "106"}	156	6	162	0	-0.166667	......	1	.....|	0.833333	-0.166667	IIE	ESS	0	-0.166667
{"name": "Sironi_motif2 (ESS Site)"	sequence: "TGTGTCG"	CV: "66.68"	position: "106"}	156	7	163	0	-0.142857	.......	1	.....||	0.714286	-0.285714	Sironi_motif2	ESS	0	-0.285714
{"name": "RESCUE ESE (ESE Site)"	sequence: "GTGTCG"	CV: "NA"	position: "107"}	157	6	163	0.166667	0	......	1	....||	0.666667	-0.333333	RESCUE ESE	ESE	-0.333333	0
{"name": "Sironi_motif2 (ESS Site)"	sequence: "TGTCGGT"	CV: "73.28"	position: "108"}	158	7	165	0	-0.142857	.......	1	...||||	0.428571	-0.571429	Sironi_motif2	ESS	0	-0.571429
{"name": "ESE_SC35 (ESE Site)"	sequence: "GTACTGCG"	CV: "75.18"	position: "113"}	163	8	171	0.125	0	...)))..	0.625	||||||||	0	-0.625	ESE_SC35	ESE	-0.625	0
{"name": "EIE (ESE Site)"	sequence: "ACTGCG"	CV: "NA"	position: "115"}	165	6	171	0.166667	0	.)))..	0.5	||||||	0	-0.5	EIE	ESE	-0.5	0
{"name": "EIE (ESE Site)"	sequence: "CTGCGA"	CV: "NA"	position: "116"}	166	6	172	0.166667	0	)))...	0.5	||||||	0	-0.5	EIE	ESE	-0.5	0
{"name": "EIE (ESE Site)"	sequence: "TGCGAG"	CV: "NA"	position: "117"}	167	6	173	0.166667	0	))...)	0.5	||||||	0	-0.5	EIE	ESE	-0.5	0
{"name": "Sironi_motif2 (ESS Site)"	sequence: "TGCGAGG"	CV: "71.04"	position: "117"}	167	7	174	0	-0.142857	))...))	0.428571	|||||||	0	-0.428571	Sironi_motif2	ESS	0	-0.428571
{"name": "Sironi_motif1 (ESS Site)"	sequence: "TGCGAGGC"	CV: "65.65"	position: "117"}	167	8	175	0	-0.125	))...)))	0.375	||||||||	0	-0.375	Sironi_motif1	ESS	0	-0.375
{"name": "EIE (ESE Site)"	sequence: "CGAGGC"	CV: "NA"	position: "119"}	169	6	175	0.166667	0	...)))	0.5	||||||	0	-0.5	EIE	ESE	-0.5	0
{"name": "ESE_9G8 (ESE Site)"	sequence: "GAGGCA"	CV: "63.49"	position: "120"}	170	6	176	0.166667	0	..))))	0.333333	||||||	0	-0.333333	ESE_9G8	ESE	-0.333333	0
{"name": "ESS_hnRNPA1 (ESS Site)"	sequence: "GAGGCA"	CV: "78.93"	position: "120"}	170	6	176	0	-0.166667	..))))	0.333333	||||||	0	-0.333333	ESS_hnRNPA1	ESS	0	-0.333333
{"name": "ESE_9G8 (ESE Site)"	sequence: "GCAGAG"	CV: "67.52"	position: "123"}	173	6	179	0.166667	0	))))))	0	||||||	0	0	ESE_9G8	ESE	0	0
{"name": "EIE (ESE Site)"	sequence: "GCAGAG"	CV: "NA"	position: "123"}	173	6	179	0.166667	0	))))))	0	||||||	0	0	EIE	ESE	0	0
{"name": "Sironi_motif1 (ESS Site)"	sequence: "GCAGAGAG"	CV: "66.36"	position: "123"}	173	8	181	0	-0.125	))))))))	0	||||||||	0	0	Sironi_motif1	ESS	0	0
{"name": "ESS_hnRNPA1 (ESS Site)"	sequence: "CAGAGA"	CV: "73.7"	position: "124"}	174	6	180	0	-0.166667	))))))	0	||||||	0	0	ESS_hnRNPA1	ESS	0	0
{"name": "EIE (ESE Site)"	sequence: "CAGAGA"	CV: "NA"	position: "124"}	174	6	180	0.166667	0	))))))	0	||||||	0	0	EIE	ESE	0	0
{"name": "ESE_ASF (ESE Site)"	sequence: "CAGAGAG"	CV: "76.15"	position: "124"}	174	7	181	0.142857	0	)))))))	0	|||||||	0	0	ESE_ASF	ESE	0	0
{"name": "ESE_ASFB (ESE Site)"	sequence: "CAGAGAG"	CV: "76.08"	position: "124"}	174	7	181	0.142857	0	)))))))	0	|||||||	0	0	ESE_ASFB	ESE	0	0
{"name": "EIE (ESE Site)"	sequence: "AGAGAG"	CV: "NA"	position: "125"}	175	6	181	0.166667	0	))))))	0	||||||	0	0	EIE	ESE	0	0
{"name": "ESE_SRp40 (ESE Site)"	sequence: "AGAGAGG"	CV: "78.41"	position: "125"}	175	7	182	0.142857	0	)))))).	0.142857	|||||||	0	-0.142857	ESE_SRp40	ESE	-0.142857	0
{"name": "Sironi_motif2 (ESS Site)"	sequence: "AGAGAGG"	CV: "73.7"	position: "125"}	175	7	182	0	-0.142857	)))))).	0.142857	|||||||	0	-0.142857	Sironi_motif2	ESS	0	-0.142857
{"name": "Sironi_motif1 (ESS Site)"	sequence: "AGAGAGGA"	CV: "82.1"	position: "125"}	175	8	183	0	-0.125	))))))..	0.25	||||||||	0	-0.25	Sironi_motif1	ESS	0	-0.25
{"name": "PESE (ESE Site)"	sequence: "AGAGAGGA"	CV: "43.89814972273"	position: "125"}	175	8	183	0.125	0	))))))..	0.25	||||||||	0	-0.25	PESE	ESE	-0.25	0
{"name": "ESS_hnRNPA1 (ESS Site)"	sequence: "GAGAGG"	CV: "74.65"	position: "126"}	176	6	182	0	-0.166667	))))).	0.166667	||||||	0	-0.166667	ESS_hnRNPA1	ESS	0	-0.166667
{"name": "ESE_ASF (ESE Site)"	sequence: "GAGAGGA"	CV: "86.17"	position: "126"}	176	7	183	0.142857	0	)))))..	0.285714	|||||||	0	-0.285714	ESE_ASF	ESE	-0.285714	0
{"name": "RESCUE ESE (ESE Site)"	sequence: "AGAGGA"	CV: "NA"	position: "127"}	177	6	183	0.166667	0	))))..	0.333333	||||||	0	-0.333333	RESCUE ESE	ESE	-0.333333	0
{"name": "EIE (ESE Site)"	sequence: "AGAGGA"	CV: "NA"	position: "127"}	177	6	183	0.166667	0	))))..	0.333333	||||||	0	-0.333333	EIE	ESE	-0.333333	0
{"name": "Sironi_motif2 (ESS Site)"	sequence: "AGAGGAG"	CV: "73.7"	position: "127"}	177	7	184	0	-0.142857	))))...	0.428571	|||||||	0	-0.428571	Sironi_motif2	ESS	0	-0.428571
{"name": "ESE_9G8 (ESE Site)"	sequence: "GAGGAG"	CV: "79.87"	position: "128"}	178	6	184	0.166667	0	)))...	0.5	||||||	0	-0.5	ESE_9G8	ESE	-0.5	0
{"name": "ESS_hnRNPA1 (ESS Site)"	sequence: "GAGGAG"	CV: "77.74"	position: "128"}	178	6	184	0	-0.166667	)))...	0.5	||||||	0	-0.5	ESS_hnRNPA1	ESS	0	-0.5
{"name": "RESCUE ESE (ESE Site)"	sequence: "GAGGAG"	CV: "NA"	position: "128"}	178	6	184	0.166667	0	)))...	0.5	||||||	0	-0.5	RESCUE ESE	ESE	-0.5	0
{"name": "EIE (ESE Site)"	sequence: "GAGGAG"	CV: "NA"	position: "128"}	178	6	184	0.166667	0	)))...	0.5	||||||	0	-0.5	EIE	ESE	-0.5	0
{"name": "Sironi_motif1 (ESS Site)"	sequence: "GAGGAGGG"	CV: "65.72"	position: "128"}	178	8	186	0	-0.125	))).....	0.625	||||||||	0	-0.625	Sironi_motif1	ESS	0	-0.625
{"name": "EIE (ESE Site)"	sequence: "AGGAGG"	CV: "NA"	position: "129"}	179	6	185	0.166667	0	))....	0.666667	||||||	0	-0.666667	EIE	ESE	-0.666667	0
{"name": "ESE_ASF (ESE Site)"	sequence: "AGGAGGG"	CV: "73.88"	position: "129"}	179	7	186	0.142857	0	)).....	0.714286	|||||||	0	-0.714286	ESE_ASF	ESE	-0.714286	0
{"name": "Sironi_motif2 (ESS Site)"	sequence: "AGGAGGG"	CV: "65.97"	position: "129"}	179	7	186	0	-0.142857	)).....	0.714286	|||||||	0	-0.714286	Sironi_motif2	ESS	0	-0.714286
{"name": "IIE (ESS Site)"	sequence: "GGAGGG"	CV: "NA"	position: "130"}	180	6	186	0	-0.166667	).....	0.833333	||||||	0	-0.833333	IIE	ESS	0	-0.833333
{"name": "Fas ESS (ESS Site)"	sequence: "GGAGGG"	CV: "NA"	position: "130"}	180	6	186	0	-0.166667	).....	0.833333	||||||	0	-0.833333	Fas ESS	ESS	0	-0.833333
{"name": "Sironi_motif2 (ESS Site)"	sequence: "GGAGGGC"	CV: "84.33"	position: "130"}	180	7	187	0	-0.142857	)......	0.857143	||||||.	0.142857	-0.714286	Sironi_motif2	ESS	0	-0.714286
{"name": "ESE_9G8 (ESE Site)"	sequence: "GAGGGC"	CV: "79"	position: "131"}	181	6	187	0.166667	0	......	1	|||||.	0.166667	-0.833333	ESE_9G8	ESE	-0.833333	0
{"name": "ESS_hnRNPA1 (ESS Site)"	sequence: "GAGGGC"	CV: "87.03"	position: "131"}	181	6	187	0	-0.166667	......	1	|||||.	0.166667	-0.833333	ESS_hnRNPA1	ESS	0	-0.833333
{"name": "ESE_SC35 (ESE Site)"	sequence: "GGGCCCTG"	CV: "85.38"	position: "133"}	183	8	191	0.125	0	.......)	0.875	|||.....	0.625	-0.25	ESE_SC35	ESE	-0.25	0
{"name": "EIE (ESE Site)"	sequence: "GGCCCT"	CV: "NA"	position: "134"}	184	6	190	0.166667	0	......	1	||....	0.666667	-0.333333	EIE	ESE	-0.333333	0
{"name": "PESE (ESE Site)"	sequence: "GGCCCTGC"	CV: "13.27628899332"	position: "134"}	184	8	192	0.125	0	......))	0.75	||......	0.75	0	PESE	ESE	0	0
{"name": "EIE (ESE Site)"	sequence: "GCCCTG"	CV: "NA"	position: "135"}	185	6	191	0.166667	0	.....)	0.833333	|.....	0.833333	0	EIE	ESE	0	0
{"name": "EIE (ESE Site)"	sequence: "CCCTGC"	CV: "NA"	position: "136"}	186	6	192	0.166667	0	....))	0.666667	......	1	0.333333	EIE	ESE	0.333333	0
{"name": "EIE (ESE Site)"	sequence: "CCTGCT"	CV: "NA"	position: "137"}	187	6	193	0.166667	0	...)))	0.5	......	1	0.5	EIE	ESE	0.5	0
{"name": "IIE (ESS Site)"	sequence: "CTGCTG"	CV: "NA"	position: "138"}	188	6	194	0	-0.166667	..))).	0.5	......	1	0.5	IIE	ESS	0	0.5
{"name": "ESE_SRp55 (ESE Site)"	sequence: "TGCTGC"	CV: "76.4"	position: "139"}	189	6	195	0.166667	0	.)))..	0.5	......	1	0.5	ESE_SRp55	ESE	0.5	0
{"name": "ESE_ASFB (ESE Site)"	sequence: "CTGCAGT"	CV: "71.77"	position: "141"}	191	7	198	0.142857	0	)).....	0.714286	.......	1	0.285714	ESE_ASFB	ESE	0.285714	0
{"name": "IIE (ESS Site)"	sequence: "TGCAGT"	CV: "NA"	position: "142"}	192	6	198	0	-0.166667	).....	0.833333	......	1	0.166667	IIE	ESS	0	0.166667
{"name": "ESE_9G8 (ESE Site)"	sequence: "GCAGTC"	CV: "63.23"	position: "143"}	193	6	199	0.166667	0	......	1	......	1	0	ESE_9G8	ESE	0	0
{"name": "EIE (ESE Site)"	sequence: "TCATCG"	CV: "NA"	position: "147"}	197	6	203	0.166667	0	......	1	......	1	0	EIE	ESE	0	0
{"name": "EIE (ESE Site)"	sequence: "CATCGT"	CV: "NA"	position: "148"}	198	6	204	0.166667	0	......	1	......	1	0	EIE	ESE	0	0
{"name": "EIE (ESE Site)"	sequence: "ATCGTG"	CV: "NA"	position: "149"}	199	6	205	0.166667	0	......	1	......	1	0	EIE	ESE	0	0
{"name": "EIE (ESE Site)"	sequence: "TCGTGG"	CV: "NA"	position: "150"}	200	6	206	0.166667	0	......	1	......	1	0	EIE	ESE	0	0
{"name": "ESE_SRp55 (ESE Site)"	sequence: "CGTGGC"	CV: "75.89"	position: "151"}	201	6	207	0.166667	0	......	1	......	1	0	ESE_SRp55	ESE	0	0
{"name": "Sironi_motif2 (ESS Site)"	sequence: "CGTGGCT"	CV: "61.65"	position: "151"}	201	7	208	0	-0.142857	.......	1	.......	1	0	Sironi_motif2	ESS	0	0
{"name": "IIE (ESS Site)"	sequence: "GTGGCT"	CV: "NA"	position: "152"}	202	6	208	0	-0.166667	......	1	......	1	0	IIE	ESS	0	0
{"name": "ESE_ASF (ESE Site)"	sequence: "GGCTCGA"	CV: "74.29"	position: "154"}	204	7	211	0.142857	0	.......	1	.......	1	0	ESE_ASF	ESE	0	0
{"name": "ESE_SC35 (ESE Site)"	sequence: "GGCTCGAA"	CV: "83.54"	position: "154"}	204	8	212	0.125	0	........	1	........	1	0	ESE_SC35	ESE	0	0
{"name": "ESE_ASF (ESE Site)"	sequence: "CGAACGG"	CV: "80.05"	position: "158"}	208	7	215	0.142857	0	.......	1	......)	0.857143	-0.142857	ESE_ASF	ESE	-0.142857	0
{"name": "ESE_ASFB (ESE Site)"	sequence: "CGAACGG"	CV: "83"	position: "158"}	208	7	215	0.142857	0	.......	1	......)	0.857143	-0.142857	ESE_ASFB	ESE	-0.142857	0
{"name": "EIE (ESE Site)"	sequence: "GAACGG"	CV: "NA"	position: "159"}	209	6	215	0.166667	0	......	1	.....)	0.833333	-0.166667	EIE	ESE	-0.166667	0
{"name": "Sironi_motif2 (ESS Site)"	sequence: "GAACGGG"	CV: "62.31"	position: "159"}	209	7	216	0	-0.142857	.......	1	.....))	0.714286	-0.285714	Sironi_motif2	ESS	0	-0.285714
{"name": "EIE (ESE Site)"	sequence: "AACGGG"	CV: "NA"	position: "160"}	210	6	216	0.166667	0	......	1	....))	0.666667	-0.333333	EIE	ESE	-0.333333	0
{"name": "Sironi_motif2 (ESS Site)"	sequence: "GGTCAGG"	CV: "65.36"	position: "164"}	214	7	221	0	-0.142857	.....))	0.714286	))...))	0.428571	-0.285714	Sironi_motif2	ESS	0	-0.285714
{"name": "ESS_hnRNPA1 (ESS Site)"	sequence: "CAGGCC"	CV: "73.22"	position: "167"}	217	6	223	0	-0.166667	..))))	0.333333	..))))	0.333333	0	ESS_hnRNPA1	ESS	0	0
{"name": "EIE (ESE Site)"	sequence: "GGCCCT"	CV: "NA"	position: "169"}	219	6	225	0.166667	0	))))))	0	))))))	0	0	EIE	ESE	0	0
{"name": "PESE (ESE Site)"	sequence: "GGCCCTGC"	CV: "13.27628899332"	position: "169"}	219	8	227	0.125	0	))))))))	0	))))))))	0	0	PESE	ESE	0	0
{"name": "EIE (ESE Site)"	sequence: "GCCCTG"	CV: "NA"	position: "170"}	220	6	226	0.166667	0	))))))	0	))))))	0	0	EIE	ESE	0	0
{"name": "EIE (ESE Site)"	sequence: "CCCTGC"	CV: "NA"	position: "171"}	221	6	227	0.166667	0	))))))	0	))))))	0	0	EIE	ESE	0	0
{"name": "EIE (ESE Site)"	sequence: "CCTGCC"	CV: "NA"	position: "172"}	222	6	228	0.166667	0	))))))	0	))))))	0	0	EIE	ESE	0	0
{"name": "Sironi_motif3 (ESS Site)"	sequence: "CCTGCCCC"	CV: "67.52"	position: "172"}	222	8	230	0	-0.125	))))))..	0.25	))))))..	0.25	0	Sironi_motif3	ESS	0	0
{"name": "EIE (ESE Site)"	sequence: "CTGCCC"	CV: "NA"	position: "173"}	223	6	229	0.166667	0	))))).	0.166667	))))).	0.166667	0	EIE	ESE	0	0
{"name": "EIE (ESE Site)"	sequence: "TGCCCC"	CV: "NA"	position: "174"}	224	6	230	0.166667	0	))))..	0.333333	))))..	0.333333	0	EIE	ESE	0	0
{"name": "ESE_SC35 (ESE Site)"	sequence: "TGCCCCCG"	CV: "83.05"	position: "174"}	224	8	232	0.125	0	))))...)	0.375	))))...)	0.375	0	ESE_SC35	ESE	0	0
{"name": "Sironi_motif3 (ESS Site)"	sequence: "TGCCCCCG"	CV: "60.44"	position: "174"}	224	8	232	0	-0.125	))))...)	0.375	))))...)	0.375	0	Sironi_motif3	ESS	0	0
{"name": "EIE (ESE Site)"	sequence: "GCCCCC"	CV: "NA"	position: "175"}	225	6	231	0.166667	0	)))...	0.5	)))...	0.5	0	EIE	ESE	0	0
{"name": "Sironi_motif3 (ESS Site)"	sequence: "GCCCCCGT"	CV: "61.69"	position: "175"}	225	8	233	0	-0.125	)))...))	0.375	)))...))	0.375	0	Sironi_motif3	ESS	0	0
{"name": "ESE_ASF (ESE Site)"	sequence: "CCCCCGT"	CV: "82.56"	position: "176"}	226	7	233	0.142857	0	))...))	0.428571	))...))	0.428571	0	ESE_ASF	ESE	0	0
{"name": "ESE_ASFB (ESE Site)"	sequence: "CCCCCGT"	CV: "87.46"	position: "176"}	226	7	233	0.142857	0	))...))	0.428571	))...))	0.428571	0	ESE_ASFB	ESE	0	0
{"name": "ESE_SRp55 (ESE Site)"	sequence: "CCCGTC"	CV: "76.27"	position: "178"}	228	6	234	0.166667	0	...)))	0.5	...)))	0.5	0	ESE_SRp55	ESE	0	0

## Sheet: COL7A1 e15 - Analysis
Char	Str 1	Str 2	Mask	Comp	Concat	ESE	ESS	ESE+ESS	S1, ESE	S1, ESS	S1, ESE + ESS	S2,ESE	S2, ESS	S2,ESE + ESS	∆ESE	∆ESS	∆ESE+ESS
1	.	.	.	.	.	0	0	0	0	0	0	0	0	0	0	0	0
2	.	.	.	.	..	0	0	0	0	0	0	0	0	0	0	0	0
3	.	.	.	.	...	0	0	0	0	0	0	0	0	0	0	0	0
4	.	.	.	.	....	0	0	0	0	0	0	0	0	0	0	0	0
5	.	.	.	.	.....	0	0	0	0	0	0	0	0	0	0	0	0
6	(	(	.	(	.....(	0	0	0	0	0	0	0	0	0	0	0	0
7	(	(	.	(	.....((	0	0	0	0	0	0	0	0	0	0	0	0
8	(	(	.	(	.....(((	0	0	0	0	0	0	0	0	0	0	0	0
9	(	(	.	(	.....((((	0	0	0	0	0	0	0	0	0	0	0	0
10	(	(	.	(	.....(((((	0	0	0	0	0	0	0	0	0	0	0	0
11	.	.	.	.	.....(((((.	0	0	0	0	0	0	0	0	0	0	0	0
12	.	.	.	.	.....(((((..	0	0	0	0	0	0	0	0	0	0	0	0
13	(	(	.	(	.....(((((..(	0	0	0	0	0	0	0	0	0	0	0	0
14	(	(	.	(	.....(((((..((	0	0	0	0	0	0	0	0	0	0	0	0
15	(	(	.	(	.....(((((..(((	0	0	0	0	0	0	0	0	0	0	0	0
16	.	(	.	(	.....(((((..((((	0	0	0	0	0	0	0	0	0	0	0	0
17	.	.	.	.	.....(((((..((((.	0	0	0	0	0	0	0	0	0	0	0	0
18	(	(	.	(	.....(((((..((((.(	0	0	0	0	0	0	0	0	0	0	0	0
19	(	(	.	(	.....(((((..((((.((	0	0	0	0	0	0	0	0	0	0	0	0
20	(	(	.	(	.....(((((..((((.(((	0	0	0	0	0	0	0	0	0	0	0	0
21	.	.	.	.	.....(((((..((((.(((.	0	0	0	0	0	0	0	0	0	0	0	0
22	(	(	.	(	.....(((((..((((.(((.(	0	0	0	0	0	0	0	0	0	0	0	0
23	(	(	.	(	.....(((((..((((.(((.((	0	0	0	0	0	0	0	0	0	0	0	0
24	(	(	.	(	.....(((((..((((.(((.(((	0	0	0	0	0	0	0	0	0	0	0	0
25	(	(	.	(	.....(((((..((((.(((.((((	0	0	0	0	0	0	0	0	0	0	0	0
26	.	.	.	.	.....(((((..((((.(((.((((.	0	0	0	0	0	0	0	0	0	0	0	0
27	.	.	.	.	.....(((((..((((.(((.((((..	0	0	0	0	0	0	0	0	0	0	0	0
28	(	(	.	(	.....(((((..((((.(((.((((..(	0	0	0	0	0	0	0	0	0	0	0	0
29	(	(	.	(	.....(((((..((((.(((.((((..((	0	0	0	0	0	0	0	0	0	0	0	0
30	(	(	.	(	.....(((((..((((.(((.((((..(((	0	0	0	0	0	0	0	0	0	0	0	0
31	(	(	.	(	.....(((((..((((.(((.((((..((((	0	0	0	0	0	0	0	0	0	0	0	0
32	(	(	.	(	.....(((((..((((.(((.((((..(((((	0	0	0	0	0	0	0	0	0	0	0	0
33	(	(	.	(	.....(((((..((((.(((.((((..((((((	0	0	0	0	0	0	0	0	0	0	0	0
34	.	.	.	.	.....(((((..((((.(((.((((..((((((.	0	0	0	0	0	0	0	0	0	0	0	0
35	(	(	.	(	.....(((((..((((.(((.((((..((((((.(	0	0	0	0	0	0	0	0	0	0	0	0
36	(	(	.	(	.....(((((..((((.(((.((((..((((((.((	0	0	0	0	0	0	0	0	0	0	0	0
37	(	(	.	(	.....(((((..((((.(((.((((..((((((.(((	0	0	0	0	0	0	0	0	0	0	0	0
38	(	(	.	(	.....(((((..((((.(((.((((..((((((.((((	0	0	0	0	0	0	0	0	0	0	0	0
39	(	(	.	(	.....(((((..((((.(((.((((..((((((.(((((	0	0	0	0	0	0	0	0	0	0	0	0
40	(	(	.	(	.....(((((..((((.(((.((((..((((((.((((((	0	0	0	0	0	0	0	0	0	0	0	0
41	.	.	.	.	.....(((((..((((.(((.((((..((((((.((((((.	0	0	0	0	0	0	0	0	0	0	0	0
42	(	(	.	(	.....(((((..((((.(((.((((..((((((.((((((.(	0	0	0	0	0	0	0	0	0	0	0	0
43	(	(	.	(	.....(((((..((((.(((.((((..((((((.((((((.((	0	0	0	0	0	0	0	0	0	0	0	0
44	(	(	.	(	.....(((((..((((.(((.((((..((((((.((((((.(((	0	0	0	0	0	0	0	0	0	0	0	0
45	.	.	.	.	.....(((((..((((.(((.((((..((((((.((((((.(((.	0	0	0	0	0	0	0	0	0	0	0	0
46	.	.	.	.	.....(((((..((((.(((.((((..((((((.((((((.(((..	0	0	0	0	0	0	0	0	0	0	0	0
47	.	.	.	.	.....(((((..((((.(((.((((..((((((.((((((.(((...	0	0	0	0	0	0	0	0	0	0	0	0
48	.	(	.	(	.....(((((..((((.(((.((((..((((((.((((((.(((...(	0	0	0	0	0	0	0	0	0	0	0	0
49	.	(	.	(	.....(((((..((((.(((.((((..((((((.((((((.(((...((	0	0	0	0	0	0	0	0	0	0	0	0
50	(	.	.	.	.....(((((..((((.(((.((((..((((((.((((((.(((...((.	0	0	0	0	0	0	0	0	0	0	0	0
51	(	.	.	.	.....(((((..((((.(((.((((..((((((.((((((.(((...((..	0	0	0	0	0	0	0	0	0	0	0	0
52	(	.	.	.	.....(((((..((((.(((.((((..((((((.((((((.(((...((...	0	0	0	0	0	0	0	0	0	0	0	0
53	.	.	.	.	.....(((((..((((.(((.((((..((((((.((((((.(((...((....	0	0	0	0	0	0	0	0	0	0	0	0
54	.	.	.	.	.....(((((..((((.(((.((((..((((((.((((((.(((...((.....	0	-0.125	-0.125	0	-0.125	-0.125	0	-0.125	-0.125	0	0	0
55	.	.	.	.	.....(((((..((((.(((.((((..((((((.((((((.(((...((......	0	-0.125	-0.125	0	-0.125	-0.125	0	-0.125	-0.125	0	0	0
56	.	.	.	.	.....(((((..((((.(((.((((..((((((.((((((.(((...((.......	0	-0.125	-0.125	0	-0.125	-0.125	0	-0.125	-0.125	0	0	0
57	.	.	.	.	.....(((((..((((.(((.((((..((((((.((((((.(((...((........	0	-0.125	-0.125	0	-0.125	-0.125	0	-0.125	-0.125	0	0	0
58	.	.	.	.	.....(((((..((((.(((.((((..((((((.((((((.(((...((.........	0	-0.25	-0.25	0	-0.25	-0.25	0	-0.25	-0.25	0	0	0
59	.	(	.	(	.....(((((..((((.(((.((((..((((((.((((((.(((...((.........(	0	-0.25	-0.25	0	-0.25	-0.25	0	0	0	0	0.25	0.25
60	.	(	.	(	.....(((((..((((.(((.((((..((((((.((((((.(((...((.........((	0.125	-0.25	-0.125	0.125	-0.25	-0.125	0	0	0	-0.125	0.25	0.125
61	.	(	.	(	.....(((((..((((.(((.((((..((((((.((((((.(((...((.........(((	0.577381	-0.25	0.327381	0.577381	-0.25	0.327381	0	0	0	-0.577381	0.25	-0.327381
62	.	(	.	(	.....(((((..((((.(((.((((..((((((.((((((.(((...((.........((((	0.744048	-0.291667	0.452381	0.744048	-0.291667	0.452381	0	0	0	-0.744048	0.291667	-0.452381
63	.	(	.	(	.....(((((..((((.(((.((((..((((((.((((((.(((...((.........(((((	1.03571	-0.291667	0.744048	1.03571	-0.291667	0.744048	0	0	0	-1.03571	0.291667	-0.744048
64	(	(	.	(	.....(((((..((((.(((.((((..((((((.((((((.(((...((.........((((((	1.20238	-0.291667	0.910714	0	0	0	0	0	0	0	0	0
65	(	(	.	(	.....(((((..((((.(((.((((..((((((.((((((.(((...((.........(((((((	1.34524	-0.416667	0.928571	0	0	0	0	0	0	0	0	0
66	(	(	.	(	.....(((((..((((.(((.((((..((((((.((((((.(((...((.........((((((((	1.63095	-0.291667	1.33929	0	0	0	0	0	0	0	0	0
67	.	.	.	.	.....(((((..((((.(((.((((..((((((.((((((.(((...((.........((((((((.	1.46429	-0.291667	1.17262	1.46429	-0.291667	1.17262	1.46429	-0.291667	1.17262	0	0	0
68	.	.	.	.	.....(((((..((((.(((.((((..((((((.((((((.(((...((.........((((((((..	0.886905	-0.291667	0.595238	0.886905	-0.291667	0.595238	0.886905	-0.291667	0.595238	0	0	0
69	.	.	.	.	.....(((((..((((.(((.((((..((((((.((((((.(((...((.........((((((((...	0.720238	-0.291667	0.428571	0.720238	-0.291667	0.428571	0.720238	-0.291667	0.428571	0	0	0
70	)	)	.	)	.....(((((..((((.(((.((((..((((((.((((((.(((...((.........((((((((...)	0.553571	-0.434524	0.119048	0	0	0	0	0	0	0	0	0
71	)	)	.	)	.....(((((..((((.(((.((((..((((((.((((((.(((...((.........((((((((...))	0.696429	-0.434524	0.261905	0	0	0	0	0	0	0	0	0
72	)	)	.	)	.....(((((..((((.(((.((((..((((((.((((((.(((...((.........((((((((...)))	0.720238	-0.434524	0.285714	0	0	0	0	0	0	0	0	0
73	.	)	.	)	.....(((((..((((.(((.((((..((((((.((((((.(((...((.........((((((((...))))	0.434524	-0.434524	1.11022e-16	0.434524	-0.434524	1.11022e-16	0	0	0	-0.434524	0.434524	-1.11022e-16
74	.	.	.	.	.....(((((..((((.(((.((((..((((((.((((((.(((...((.........((((((((...)))).	0.577381	-0.267857	0.309524	0.577381	-0.267857	0.309524	0.577381	-0.267857	0.309524	0	0	0
75	.	)	.	)	.....(((((..((((.(((.((((..((((((.((((((.(((...((.........((((((((...)))).)	0.744048	-0.267857	0.47619	0.744048	-0.267857	0.47619	0	0	0	-0.744048	0.267857	-0.47619
76	.	)	.	)	.....(((((..((((.(((.((((..((((((.((((((.(((...((.........((((((((...)))).))	0.869048	-0.267857	0.60119	0.869048	-0.267857	0.60119	0	0	0	-0.869048	0.267857	-0.60119
77	.	)	.	)	.....(((((..((((.(((.((((..((((((.((((((.(((...((.........((((((((...)))).)))	0.869048	-0.125	0.744048	0.869048	-0.125	0.744048	0	0	0	-0.869048	0.125	-0.744048
78	.	)	.	)	.....(((((..((((.(((.((((..((((((.((((((.(((...((.........((((((((...)))).))))	0.559524	-0.125	0.434524	0.559524	-0.125	0.434524	0	0	0	-0.559524	0.125	-0.434524
79	.	.	.	.	.....(((((..((((.(((.((((..((((((.((((((.(((...((.........((((((((...)))).)))).	0.434524	-0.125	0.309524	0.434524	-0.125	0.309524	0.434524	-0.125	0.309524	0	0	0
80	.	.	.	.	.....(((((..((((.(((.((((..((((((.((((((.(((...((.........((((((((...)))).))))..	0.434524	-0.25	0.184524	0.434524	-0.25	0.184524	0.434524	-0.25	0.184524	0	0	0
81	.	.	.	.	.....(((((..((((.(((.((((..((((((.((((((.(((...((.........((((((((...)))).))))...	0.410714	-0.125	0.285714	0.410714	-0.125	0.285714	0.410714	-0.125	0.285714	0	0	0
82	.	.	.	.	.....(((((..((((.(((.((((..((((((.((((((.(((...((.........((((((((...)))).))))....	0.410714	-0.125	0.285714	0.410714	-0.125	0.285714	0.410714	-0.125	0.285714	0	0	0
83	.	.	.	.	.....(((((..((((.(((.((((..((((((.((((((.(((...((.........((((((((...)))).)))).....	0.577381	-0.125	0.452381	0.577381	-0.125	0.452381	0.577381	-0.125	0.452381	0	0	0
84	.	.	.	.	.....(((((..((((.(((.((((..((((((.((((((.(((...((.........((((((((...)))).))))......	0.785714	-0.25	0.535714	0.785714	-0.25	0.535714	0.785714	-0.25	0.535714	0	0	0
85	.	.	.	.	.....(((((..((((.(((.((((..((((((.((((((.(((...((.........((((((((...)))).)))).......	0.952381	-0.25	0.702381	0.952381	-0.25	0.702381	0.952381	-0.25	0.702381	0	0	0
86	.	.	.	.	.....(((((..((((.(((.((((..((((((.((((((.(((...((.........((((((((...)))).))))........	1.07738	-0.25	0.827381	1.07738	-0.25	0.827381	1.07738	-0.25	0.827381	0	0	0
87	.	.	.	.	.....(((((..((((.(((.((((..((((((.((((((.(((...((.........((((((((...)))).)))).........	1.22024	-0.25	0.970238	1.22024	-0.25	0.970238	1.22024	-0.25	0.970238	0	0	0
88	.	.	.	.	.....(((((..((((.(((.((((..((((((.((((((.(((...((.........((((((((...)))).))))..........	1.07738	-0.125	0.952381	1.07738	-0.125	0.952381	1.07738	-0.125	0.952381	0	0	0
89	.	.	.	.	.....(((((..((((.(((.((((..((((((.((((((.(((...((.........((((((((...)))).))))...........	0.910714	-0.125	0.785714	0.910714	-0.125	0.785714	0.910714	-0.125	0.785714	0	0	0
90	.	.	.	.	.....(((((..((((.(((.((((..((((((.((((((.(((...((.........((((((((...)))).))))............	0.577381	-0.25	0.327381	0.577381	-0.25	0.327381	0.577381	-0.25	0.327381	0	0	0
91	.	.	.	.	.....(((((..((((.(((.((((..((((((.((((((.(((...((.........((((((((...)))).)))).............	0.577381	-0.25	0.327381	0.577381	-0.25	0.327381	0.577381	-0.25	0.327381	0	0	0
92	.	.	.	.	.....(((((..((((.(((.((((..((((((.((((((.(((...((.........((((((((...)))).))))..............	0.869048	-0.25	0.619048	0.869048	-0.25	0.619048	0.869048	-0.25	0.619048	0	0	0
93	.	.	.	.	.....(((((..((((.(((.((((..((((((.((((((.(((...((.........((((((((...)))).))))...............	1.16071	-0.375	0.785714	1.16071	-0.375	0.785714	1.16071	-0.375	0.785714	0	0	0
94	.	.	.	.	.....(((((..((((.(((.((((..((((((.((((((.(((...((.........((((((((...)))).))))................	1.20238	-0.375	0.827381	1.20238	-0.375	0.827381	1.20238	-0.375	0.827381	0	0	0
95	.	.	.	.	.....(((((..((((.(((.((((..((((((.((((((.(((...((.........((((((((...)))).)))).................	1.36905	-0.375	0.994048	1.36905	-0.375	0.994048	1.36905	-0.375	0.994048	0	0	0
96	.	.	.	.	.....(((((..((((.(((.((((..((((((.((((((.(((...((.........((((((((...)))).))))..................	1.53571	-0.375	1.16071	1.53571	-0.375	1.16071	1.53571	-0.375	1.16071	0	0	0
97	.	.	.	.	.....(((((..((((.(((.((((..((((((.((((((.(((...((.........((((((((...)))).))))...................	1.70238	-0.5	1.20238	1.70238	-0.5	1.20238	1.70238	-0.5	1.20238	0	0	0
98	.	.	.	.	.....(((((..((((.(((.((((..((((((.((((((.(((...((.........((((((((...)))).))))....................	1.82143	-0.375	1.44643	1.82143	-0.375	1.44643	1.82143	-0.375	1.44643	0	0	0
99	.	.	.	.	.....(((((..((((.(((.((((..((((((.((((((.(((...((.........((((((((...)))).)))).....................	1.77976	-0.375	1.40476	1.77976	-0.375	1.40476	1.77976	-0.375	1.40476	0	0	0
100	.	.	.	.	.....(((((..((((.(((.((((..((((((.((((((.(((...((.........((((((((...)))).))))......................	1.4881	-0.25	1.2381	1.4881	-0.25	1.2381	1.4881	-0.25	1.2381	0	0	0
101	.	.	.	.	.....(((((..((((.(((.((((..((((((.((((((.(((...((.........((((((((...)))).)))).......................	1.22024	-0.125	1.09524	1.22024	-0.125	1.09524	1.22024	-0.125	1.09524	0	0	0
102	(	.	.	.	.....(((((..((((.(((.((((..((((((.((((((.(((...((.........((((((((...)))).))))........................	1.20238	-0.125	1.07738	0	0	0	1.20238	-0.125	1.07738	1.20238	-0.125	1.07738
103	(	.	.	.	.....(((((..((((.(((.((((..((((((.((((((.(((...((.........((((((((...)))).)))).........................	1.03571	-0.125	0.910714	0	0	0	1.03571	-0.125	0.910714	1.03571	-0.125	0.910714
104	(	.	.	.	.....(((((..((((.(((.((((..((((((.((((((.(((...((.........((((((((...)))).))))..........................	1.34524	-0.125	1.22024	0	0	0	1.34524	-0.125	1.22024	1.34524	-0.125	1.22024
105	(	.	.	.	.....(((((..((((.(((.((((..((((((.((((((.(((...((.........((((((((...)))).))))...........................	1.05952	0	1.05952	0	0	0	1.05952	0	1.05952	1.05952	0	1.05952
106	.	.	.	.	.....(((((..((((.(((.((((..((((((.((((((.(((...((.........((((((((...)))).))))............................	1.05952	-0.125	0.934524	1.05952	-0.125	0.934524	1.05952	-0.125	0.934524	0	0	0
107	(	.	.	.	.....(((((..((((.(((.((((..((((((.((((((.(((...((.........((((((((...)))).)))).............................	0.892857	-0.125	0.767857	0	0	0	0.892857	-0.125	0.767857	0.892857	-0.125	0.767857
108	(	.	.	.	.....(((((..((((.(((.((((..((((((.((((((.(((...((.........((((((((...)))).))))..............................	0.85119	-0.125	0.72619	0	0	0	0.85119	-0.125	0.72619	0.85119	-0.125	0.72619
109	(	.	.	.	.....(((((..((((.(((.((((..((((((.((((((.(((...((.........((((((((...)))).))))...............................	0.684524	-0.125	0.559524	0	0	0	0.684524	-0.125	0.559524	0.684524	-0.125	0.559524
110	(	.	.	.	.....(((((..((((.(((.((((..((((((.((((((.(((...((.........((((((((...)))).))))................................	0.535714	-0.25	0.285714	0	0	0	0.535714	-0.25	0.285714	0.535714	-0.25	0.285714
111	(	.	.	.	.....(((((..((((.(((.((((..((((((.((((((.(((...((.........((((((((...)))).)))).................................	0.702381	-0.375	0.327381	0	0	0	0.702381	-0.375	0.327381	0.702381	-0.375	0.327381
112	.	.	.	.	.....(((((..((((.(((.((((..((((((.((((((.(((...((.........((((((((...)))).))))..................................	1.03571	-0.5	0.535714	1.03571	-0.5	0.535714	1.03571	-0.5	0.535714	0	0	0
113	(	.	.	.	.....(((((..((((.(((.((((..((((((.((((((.(((...((.........((((((((...)))).))))...................................	1.4881	-0.5	0.988095	0	0	0	1.4881	-0.5	0.988095	1.4881	-0.5	0.988095
114	(	.	.	.	.....(((((..((((.(((.((((..((((((.((((((.(((...((.........((((((((...)))).))))....................................	1.94643	-0.375	1.57143	0	0	0	1.94643	-0.375	1.57143	1.94643	-0.375	1.57143
115	(	.	.	.	.....(((((..((((.(((.((((..((((((.((((((.(((...((.........((((((((...)))).)))).....................................	2.15476	-0.375	1.77976	0	0	0	2.15476	-0.375	1.77976	2.15476	-0.375	1.77976
116	.	.	.	.	.....(((((..((((.(((.((((..((((((.((((((.(((...((.........((((((((...)))).))))......................................	2.19643	-0.375	1.82143	2.19643	-0.375	1.82143	2.19643	-0.375	1.82143	0	0	0
117	.	.	.	.	.....(((((..((((.(((.((((..((((((.((((((.(((...((.........((((((((...)))).)))).......................................	1.8869	-0.5	1.3869	1.8869	-0.5	1.3869	1.8869	-0.5	1.3869	0	0	0
118	.	.	.	.	.....(((((..((((.(((.((((..((((((.((((((.(((...((.........((((((((...)))).))))........................................	1.41071	-0.375	1.03571	1.41071	-0.375	1.03571	1.41071	-0.375	1.03571	0	0	0
119	.	.	.	.	.....(((((..((((.(((.((((..((((((.((((((.(((...((.........((((((((...)))).)))).........................................	1.3869	-0.375	1.0119	1.3869	-0.375	1.0119	1.3869	-0.375	1.0119	0	0	0
120	.	.	.	.	.....(((((..((((.(((.((((..((((((.((((((.(((...((.........((((((((...)))).))))..........................................	1.05357	-0.25	0.803571	1.05357	-0.25	0.803571	1.05357	-0.25	0.803571	0	0	0
121	.	.	.	.	.....(((((..((((.(((.((((..((((((.((((((.(((...((.........((((((((...)))).))))...........................................	0.720238	-0.517857	0.202381	0.720238	-0.517857	0.202381	0.720238	-0.517857	0.202381	0	0	0
122	.	.	.	.	.....(((((..((((.(((.((((..((((((.((((((.(((...((.........((((((((...)))).))))............................................	0.595238	-0.684524	-0.0892857	0.595238	-0.684524	-0.0892857	0.595238	-0.684524	-0.0892857	0	0	0
123	.	.	.	.	.....(((((..((((.(((.((((..((((((.((((((.(((...((.........((((((((...)))).)))).............................................	0.595238	-0.684524	-0.0892857	0.595238	-0.684524	-0.0892857	0.595238	-0.684524	-0.0892857	0	0	0
124	.	.	.	.	.....(((((..((((.(((.((((..((((((.((((((.(((...((.........((((((((...)))).))))..............................................	0.595238	-0.85119	-0.255952	0.595238	-0.85119	-0.255952	0.595238	-0.85119	-0.255952	0	0	0
125	.	.	.	.	.....(((((..((((.(((.((((..((((((.((((((.(((...((.........((((((((...)))).))))...............................................	0.720238	-0.72619	-0.00595238	0.720238	-0.72619	-0.00595238	0.720238	-0.72619	-0.00595238	0	0	0
126	.	.	.	.	.....(((((..((((.(((.((((..((((((.((((((.(((...((.........((((((((...)))).))))................................................	0.577381	-0.72619	-0.14881	0.577381	-0.72619	-0.14881	0.577381	-0.72619	-0.14881	0	0	0
127	.	.	.	.	.....(((((..((((.(((.((((..((((((.((((((.(((...((.........((((((((...)))).)))).................................................	0.291667	-0.60119	-0.309524	0.291667	-0.60119	-0.309524	0.291667	-0.60119	-0.309524	0	0	0
128	.	.	.	.	.....(((((..((((.(((.((((..((((((.((((((.(((...((.........((((((((...)))).))))..................................................	0.291667	-0.291667	-4.44089e-16	0.291667	-0.291667	-4.44089e-16	0.291667	-0.291667	-4.44089e-16	0	0	0
129	.	.	.	.	.....(((((..((((.(((.((((..((((((.((((((.(((...((.........((((((((...)))).))))...................................................	0.458333	-0.166667	0.291667	0.458333	-0.166667	0.291667	0.458333	-0.166667	0.291667	0	0	0
130	.	.	.	.	.....(((((..((((.(((.((((..((((((.((((((.(((...((.........((((((((...)))).))))....................................................	0.910714	0	0.910714	0.910714	0	0.910714	0.910714	0	0.910714	0	0	0
131	.	.	.	.	.....(((((..((((.(((.((((..((((((.((((((.(((...((.........((((((((...)))).)))).....................................................	1.20238	0	1.20238	1.20238	0	1.20238	1.20238	0	1.20238	0	0	0
132	(	.	.	.	.....(((((..((((.(((.((((..((((((.((((((.(((...((.........((((((((...)))).))))......................................................	1.49405	0	1.49405	0	0	0	1.49405	0	1.49405	1.49405	0	1.49405
133	(	.	.	.	.....(((((..((((.(((.((((..((((((.((((((.(((...((.........((((((((...)))).)))).......................................................	1.66071	0	1.66071	0	0	0	1.66071	0	1.66071	1.66071	0	1.66071
134	(	.	.	.	.....(((((..((((.(((.((((..((((((.((((((.(((...((.........((((((((...)))).))))........................................................	1.66071	0	1.66071	0	0	0	1.66071	0	1.66071	1.66071	0	1.66071
135	(	.	.	.	.....(((((..((((.(((.((((..((((((.((((((.(((...((.........((((((((...)))).)))).........................................................	1.82738	0	1.82738	0	0	0	1.82738	0	1.82738	1.82738	0	1.82738
136	(	.	.	.	.....(((((..((((.(((.((((..((((((.((((((.(((...((.........((((((((...)))).))))..........................................................	1.82738	0	1.82738	0	0	0	1.82738	0	1.82738	1.82738	0	1.82738
137	(	.	.	.	.....(((((..((((.(((.((((..((((((.((((((.(((...((.........((((((((...)))).))))...........................................................	1.70833	0	1.70833	0	0	0	1.70833	0	1.70833	1.70833	0	1.70833
138	.	.	.	.	.....(((((..((((.(((.((((..((((((.((((((.(((...((.........((((((((...)))).))))............................................................	1.54167	0	1.54167	1.54167	0	1.54167	1.54167	0	1.54167	0	0	0
139	.	.	.	.	.....(((((..((((.(((.((((..((((((.((((((.(((...((.........((((((((...)))).)))).............................................................	1.41667	0	1.41667	1.41667	0	1.41667	1.41667	0	1.41667	0	0	0
140	.	.	.	.	.....(((((..((((.(((.((((..((((((.((((((.(((...((.........((((((((...)))).))))..............................................................	1.125	-0.125	1	1.125	-0.125	1	1.125	-0.125	1	0	0	0
141	.	.	.	.	.....(((((..((((.(((.((((..((((((.((((((.(((...((.........((((((((...)))).))))...............................................................	0.833333	-0.125	0.708333	0.833333	-0.125	0.708333	0.833333	-0.125	0.708333	0	0	0
142	.	(	.	(	.....(((((..((((.(((.((((..((((((.((((((.(((...((.........((((((((...)))).))))...............................................................(	0.833333	-0.125	0.708333	0.833333	-0.125	0.708333	0	0	0	-0.833333	0.125	-0.708333
143	.	(	.	(	.....(((((..((((.(((.((((..((((((.((((((.(((...((.........((((((((...)))).))))...............................................................((	0.666667	-0.25	0.416667	0.666667	-0.25	0.416667	0	0	0	-0.666667	0.25	-0.416667
144	.	(	.	(	.....(((((..((((.(((.((((..((((((.((((((.(((...((.........((((((((...)))).))))...............................................................(((	0.97619	-0.25	0.72619	0.97619	-0.25	0.72619	0	0	0	-0.97619	0.25	-0.72619
145	.	.	.	.	.....(((((..((((.(((.((((..((((((.((((((.(((...((.........((((((((...)))).))))...............................................................(((.	0.97619	-0.25	0.72619	0.97619	-0.25	0.72619	0.97619	-0.25	0.72619	0	0	0
146	.	.	.	.	.....(((((..((((.(((.((((..((((((.((((((.(((...((.........((((((((...)))).))))...............................................................(((..	0.97619	-0.25	0.72619	0.97619	-0.25	0.72619	0.97619	-0.25	0.72619	0	0	0
147	)	.	.	.	.....(((((..((((.(((.((((..((((((.((((((.(((...((.........((((((((...)))).))))...............................................................(((...	0.809524	-0.25	0.559524	0	0	0	0.809524	-0.25	0.559524	0.809524	-0.25	0.559524
148	)	.	.	.	.....(((((..((((.(((.((((..((((((.((((((.(((...((.........((((((((...)))).))))...............................................................(((....	0.642857	-0.416667	0.22619	0	0	0	0.642857	-0.416667	0.22619	0.642857	-0.416667	0.22619
149	)	.	.	.	.....(((((..((((.(((.((((..((((((.((((((.(((...((.........((((((((...)))).))))...............................................................(((.....	0.47619	-0.892857	-0.416667	0	0	0	0.47619	-0.892857	-0.416667	0.47619	-0.892857	-0.416667
150	)	)	.	)	.....(((((..((((.(((.((((..((((((.((((((.(((...((.........((((((((...)))).))))...............................................................(((.....)	0.47619	-1.20238	-0.72619	0	0	0	0	0	0	0	0	0
151	)	)	.	)	.....(((((..((((.(((.((((..((((((.((((((.(((...((.........((((((((...)))).))))...............................................................(((.....))	0.166667	-1.24405	-1.07738	0	0	0	0	0	0	0	0	0
152	)	)	.	)	.....(((((..((((.(((.((((..((((((.((((((.(((...((.........((((((((...)))).))))...............................................................(((.....)))	0.166667	-1.41071	-1.24405	0	0	0	0	0	0	0	0	0
153	.	.	.	.	.....(((((..((((.(((.((((..((((((.((((((.(((...((.........((((((((...)))).))))...............................................................(((.....))).	0.166667	-1.72024	-1.55357	0.166667	-1.72024	-1.55357	0.166667	-1.72024	-1.55357	0	0	0
154	.	.	.	.	.....(((((..((((.(((.((((..((((((.((((((.(((...((.........((((((((...)))).))))...............................................................(((.....)))..	0.333333	-1.72024	-1.3869	0.333333	-1.72024	-1.3869	0.333333	-1.72024	-1.3869	0	0	0
155	.	.	.	.	.....(((((..((((.(((.((((..((((((.((((((.(((...((.........((((((((...)))).))))...............................................................(((.....)))...	0.333333	-1.55357	-1.22024	0.333333	-1.55357	-1.22024	0.333333	-1.55357	-1.22024	0	0	0
156	.	.	.	.	.....(((((..((((.(((.((((..((((((.((((((.(((...((.........((((((((...)))).))))...............................................................(((.....)))....	0.333333	-1.42857	-1.09524	0.333333	-1.42857	-1.09524	0.333333	-1.42857	-1.09524	0	0	0
157	.	.	.	.	.....(((((..((((.(((.((((..((((((.((((((.(((...((.........((((((((...)))).))))...............................................................(((.....))).....	0.5	-1.11905	-0.619048	0.5	-1.11905	-0.619048	0.5	-1.11905	-0.619048	0	0	0
158	.	.	.	.	.....(((((..((((.(((.((((..((((((.((((((.(((...((.........((((((((...)))).))))...............................................................(((.....)))......	0.5	-1.09524	-0.595238	0.5	-1.09524	-0.595238	0.5	-1.09524	-0.595238	0	0	0
159	.	.	.	.	.....(((((..((((.(((.((((..((((((.((((((.(((...((.........((((((((...)))).))))...............................................................(((.....))).......	0.5	-0.928571	-0.428571	0.5	-0.928571	-0.428571	0.5	-0.928571	-0.428571	0	0	0
160	.	.	.	.	.....(((((..((((.(((.((((..((((((.((((((.(((...((.........((((((((...)))).))))...............................................................(((.....)))........	0.333333	-0.619048	-0.285714	0.333333	-0.619048	-0.285714	0.333333	-0.619048	-0.285714	0	0	0
161	.	.	x	|	.....(((((..((((.(((.((((..((((((.((((((.(((...((.........((((((((...)))).))))...............................................................(((.....)))........|	0.333333	-0.452381	-0.119048	0.333333	-0.452381	-0.119048	0	0	0	-0.333333	0.452381	0.119048
162	.	.	x	|	.....(((((..((((.(((.((((..((((((.((((((.(((...((.........((((((((...)))).))))...............................................................(((.....)))........||	0.166667	-0.285714	-0.119048	0.166667	-0.285714	-0.119048	0	0	0	-0.166667	0.285714	0.119048
163	.	.	x	|	.....(((((..((((.(((.((((..((((((.((((((.(((...((.........((((((((...)))).))))...............................................................(((.....)))........|||	0.125	-0.142857	-0.0178571	0.125	-0.142857	-0.0178571	0	0	0	-0.125	0.142857	0.0178571
164	.	.	x	|	.....(((((..((((.(((.((((..((((((.((((((.(((...((.........((((((((...)))).))))...............................................................(((.....)))........||||	0.125	-0.142857	-0.0178571	0.125	-0.142857	-0.0178571	0	0	0	-0.125	0.142857	0.0178571
165	.	.	x	|	.....(((((..((((.(((.((((..((((((.((((((.(((...((.........((((((((...)))).))))...............................................................(((.....)))........|||||	0.291667	0	0.291667	0.291667	0	0.291667	0	0	0	-0.291667	0	-0.291667
166	)	.	x	|	.....(((((..((((.(((.((((..((((((.((((((.(((...((.........((((((((...)))).))))...............................................................(((.....)))........||||||	0.458333	0	0.458333	0	0	0	0	0	0	0	0	0
167	)	.	x	|	.....(((((..((((.(((.((((..((((((.((((((.(((...((.........((((((((...)))).))))...............................................................(((.....)))........|||||||	0.625	-0.267857	0.357143	0	0	0	0	0	0	0	0	0
168	)	.	x	|	.....(((((..((((.(((.((((..((((((.((((((.(((...((.........((((((((...)))).))))...............................................................(((.....)))........||||||||	0.625	-0.267857	0.357143	0	0	0	0	0	0	0	0	0
169	.	.	x	|	.....(((((..((((.(((.((((..((((((.((((((.(((...((.........((((((((...)))).))))...............................................................(((.....)))........|||||||||	0.791667	-0.267857	0.52381	0.791667	-0.267857	0.52381	0	0	0	-0.791667	0.267857	-0.52381
170	.	.	x	|	.....(((((..((((.(((.((((..((((((.((((((.(((...((.........((((((((...)))).))))...............................................................(((.....)))........||||||||||	0.958333	-0.434524	0.52381	0.958333	-0.434524	0.52381	0	0	0	-0.958333	0.434524	-0.52381
171	.	.	x	|	.....(((((..((((.(((.((((..((((((.((((((.(((...((.........((((((((...)))).))))...............................................................(((.....)))........|||||||||||	0.666667	-0.434524	0.232143	0.666667	-0.434524	0.232143	0	0	0	-0.666667	0.434524	-0.232143
172	)	.	x	|	.....(((((..((((.(((.((((..((((((.((((((.(((...((.........((((((((...)))).))))...............................................................(((.....)))........||||||||||||	0.5	-0.434524	0.0654762	0	0	0	0	0	0	0	0	0
173	)	.	x	|	.....(((((..((((.(((.((((..((((((.((((((.(((...((.........((((((((...)))).))))...............................................................(((.....)))........|||||||||||||	0.666667	-0.559524	0.107143	0	0	0	0	0	0	0	0	0
174	)	.	x	|	.....(((((..((((.(((.((((..((((((.((((((.(((...((.........((((((((...)))).))))...............................................................(((.....)))........||||||||||||||	1.11905	-0.583333	0.535714	0	0	0	0	0	0	0	0	0
175	)	.	x	|	.....(((((..((((.(((.((((..((((((.((((((.(((...((.........((((((((...)))).))))...............................................................(((.....)))........|||||||||||||||	1.3869	-0.72619	0.660714	0	0	0	0	0	0	0	0	0
176	)	.	x	|	.....(((((..((((.(((.((((..((((((.((((((.(((...((.........((((((((...)))).))))...............................................................(((.....)))........||||||||||||||||	1.3631	-0.72619	0.636905	0	0	0	0	0	0	0	0	0
177	)	.	x	|	.....(((((..((((.(((.((((..((((((.((((((.(((...((.........((((((((...)))).))))...............................................................(((.....)))........|||||||||||||||||	1.69643	-0.869048	0.827381	0	0	0	0	0	0	0	0	0
178	)	.	x	|	.....(((((..((((.(((.((((..((((((.((((((.(((...((.........((((((((...)))).))))...............................................................(((.....)))........||||||||||||||||||	2.19643	-1.16071	1.03571	0	0	0	0	0	0	0	0	0
179	)	.	x	|	.....(((((..((((.(((.((((..((((((.((((((.(((...((.........((((((((...)))).))))...............................................................(((.....)))........|||||||||||||||||||	2.17262	-1.30357	0.869048	0	0	0	0	0	0	0	0	0
180	)	.	x	|	.....(((((..((((.(((.((((..((((((.((((((.(((...((.........((((((((...)))).))))...............................................................(((.....)))........||||||||||||||||||||	2.00595	-1.6131	0.392857	0	0	0	0	0	0	0	0	0
181	.	.	x	|	.....(((((..((((.(((.((((..((((((.((((((.(((...((.........((((((((...)))).))))...............................................................(((.....)))........|||||||||||||||||||||	1.72024	-1.65476	0.0654762	1.72024	-1.65476	0.0654762	0	0	0	-1.72024	1.65476	-0.0654762
182	.	.	x	|	.....(((((..((((.(((.((((..((((((.((((((.(((...((.........((((((((...)))).))))...............................................................(((.....)))........||||||||||||||||||||||	1.57738	-1.34524	0.232143	1.57738	-1.34524	0.232143	0	0	0	-1.57738	1.34524	-0.232143
183	.	.	x	|	.....(((((..((((.(((.((((..((((((.((((((.(((...((.........((((((((...)))).))))...............................................................(((.....)))........|||||||||||||||||||||||	1.10119	-1.22024	-0.119048	1.10119	-1.22024	-0.119048	0	0	0	-1.10119	1.22024	0.119048
184	.	.	x	|	.....(((((..((((.(((.((((..((((((.((((((.(((...((.........((((((((...)))).))))...............................................................(((.....)))........||||||||||||||||||||||||	0.892857	-0.910714	-0.0178571	0.892857	-0.910714	-0.0178571	0	0	0	-0.892857	0.910714	0.0178571
185	.	.	x	|	.....(((((..((((.(((.((((..((((((.((((((.(((...((.........((((((((...)))).))))...............................................................(((.....)))........|||||||||||||||||||||||||	0.892857	-0.910714	-0.0178571	0.892857	-0.910714	-0.0178571	0	0	0	-0.892857	0.910714	0.0178571
186	.	.	.	.	.....(((((..((((.(((.((((..((((((.((((((.(((...((.........((((((((...)))).))))...............................................................(((.....)))........|||||||||||||||||||||||||.	0.916667	-0.309524	0.607143	0.916667	-0.309524	0.607143	0.916667	-0.309524	0.607143	0	0	0
187	.	.	.	.	.....(((((..((((.(((.((((..((((((.((((((.(((...((.........((((((((...)))).))))...............................................................(((.....)))........|||||||||||||||||||||||||..	0.916667	0	0.916667	0.916667	0	0.916667	0.916667	0	0.916667	0	0	0
188	.	.	.	.	.....(((((..((((.(((.((((..((((((.((((((.(((...((.........((((((((...)))).))))...............................................................(((.....)))........|||||||||||||||||||||||||...	0.916667	-0.166667	0.75	0.916667	-0.166667	0.75	0.916667	-0.166667	0.75	0	0	0
189	.	.	.	.	.....(((((..((((.(((.((((..((((((.((((((.(((...((.........((((((((...)))).))))...............................................................(((.....)))........|||||||||||||||||||||||||....	1.08333	-0.166667	0.916667	1.08333	-0.166667	0.916667	1.08333	-0.166667	0.916667	0	0	0
190	)	.	.	.	.....(((((..((((.(((.((((..((((((.((((((.(((...((.........((((((((...)))).))))...............................................................(((.....)))........|||||||||||||||||||||||||.....	0.916667	-0.166667	0.75	0	0	0	0.916667	-0.166667	0.75	0.916667	-0.166667	0.75
191	)	.	.	.	.....(((((..((((.(((.((((..((((((.((((((.(((...((.........((((((((...)))).))))...............................................................(((.....)))........|||||||||||||||||||||||||......	0.767857	-0.166667	0.60119	0	0	0	0.767857	-0.166667	0.60119	0.767857	-0.166667	0.60119
192	)	.	.	.	.....(((((..((((.(((.((((..((((((.((((((.(((...((.........((((((((...)))).))))...............................................................(((.....)))........|||||||||||||||||||||||||.......	0.47619	-0.333333	0.142857	0	0	0	0.47619	-0.333333	0.142857	0.47619	-0.333333	0.142857
193	.	.	.	.	.....(((((..((((.(((.((((..((((((.((((((.(((...((.........((((((((...)))).))))...............................................................(((.....)))........|||||||||||||||||||||||||........	0.47619	-0.333333	0.142857	0.47619	-0.333333	0.142857	0.47619	-0.333333	0.142857	0	0	0
194	.	.	.	.	.....(((((..((((.(((.((((..((((((.((((((.(((...((.........((((((((...)))).))))...............................................................(((.....)))........|||||||||||||||||||||||||.........	0.47619	-0.166667	0.309524	0.47619	-0.166667	0.309524	0.47619	-0.166667	0.309524	0	0	0
195	.	.	.	.	.....(((((..((((.(((.((((..((((((.((((((.(((...((.........((((((((...)))).))))...............................................................(((.....)))........|||||||||||||||||||||||||..........	0.309524	-0.166667	0.142857	0.309524	-0.166667	0.142857	0.309524	-0.166667	0.142857	0	0	0
196	.	.	.	.	.....(((((..((((.(((.((((..((((((.((((((.(((...((.........((((((((...)))).))))...............................................................(((.....)))........|||||||||||||||||||||||||...........	0.309524	-0.166667	0.142857	0.309524	-0.166667	0.142857	0.309524	-0.166667	0.142857	0	0	0
197	.	.	.	.	.....(((((..((((.(((.((((..((((((.((((((.(((...((.........((((((((...)))).))))...............................................................(((.....)))........|||||||||||||||||||||||||............	0.47619	-0.166667	0.309524	0.47619	-0.166667	0.309524	0.47619	-0.166667	0.309524	0	0	0
198	.	.	.	.	.....(((((..((((.(((.((((..((((((.((((((.(((...((.........((((((((...)))).))))...............................................................(((.....)))........|||||||||||||||||||||||||.............	0.5	0	0.5	0.5	0	0.5	0.5	0	0.5	0	0	0
199	.	.	.	.	.....(((((..((((.(((.((((..((((((.((((((.(((...((.........((((((((...)))).))))...............................................................(((.....)))........|||||||||||||||||||||||||..............	0.5	0	0.5	0.5	0	0.5	0.5	0	0.5	0	0	0
200	.	.	.	.	.....(((((..((((.(((.((((..((((((.((((((.(((...((.........((((((((...)))).))))...............................................................(((.....)))........|||||||||||||||||||||||||...............	0.666667	0	0.666667	0.666667	0	0.666667	0.666667	0	0.666667	0	0	0
201	.	.	.	.	.....(((((..((((.(((.((((..((((((.((((((.(((...((.........((((((((...)))).))))...............................................................(((.....)))........|||||||||||||||||||||||||................	0.833333	-0.142857	0.690476	0.833333	-0.142857	0.690476	0.833333	-0.142857	0.690476	0	0	0
202	.	.	.	.	.....(((((..((((.(((.((((..((((((.((((((.(((...((.........((((((((...)))).))))...............................................................(((.....)))........|||||||||||||||||||||||||.................	0.833333	-0.309524	0.52381	0.833333	-0.309524	0.52381	0.833333	-0.309524	0.52381	0	0	0
203	.	.	.	.	.....(((((..((((.(((.((((..((((((.((((((.(((...((.........((((((((...)))).))))...............................................................(((.....)))........|||||||||||||||||||||||||..................	0.666667	-0.309524	0.357143	0.666667	-0.309524	0.357143	0.666667	-0.309524	0.357143	0	0	0
204	.	.	.	.	.....(((((..((((.(((.((((..((((((.((((((.(((...((.........((((((((...)))).))))...............................................................(((.....)))........|||||||||||||||||||||||||...................	0.767857	-0.309524	0.458333	0.767857	-0.309524	0.458333	0.767857	-0.309524	0.458333	0	0	0
205	.	.	.	.	.....(((((..((((.(((.((((..((((((.((((((.(((...((.........((((((((...)))).))))...............................................................(((.....)))........|||||||||||||||||||||||||....................	0.60119	-0.309524	0.291667	0.60119	-0.309524	0.291667	0.60119	-0.309524	0.291667	0	0	0
206	.	.	.	.	.....(((((..((((.(((.((((..((((((.((((((.(((...((.........((((((((...)))).))))...............................................................(((.....)))........|||||||||||||||||||||||||.....................	0.434524	-0.309524	0.125	0.434524	-0.309524	0.125	0.434524	-0.309524	0.125	0	0	0
207	.	.	.	.	.....(((((..((((.(((.((((..((((((.((((((.(((...((.........((((((((...)))).))))...............................................................(((.....)))........|||||||||||||||||||||||||......................	0.267857	-0.309524	-0.0416667	0.267857	-0.309524	-0.0416667	0.267857	-0.309524	-0.0416667	0	0	0
208	.	.	.	.	.....(((((..((((.(((.((((..((((((.((((((.(((...((.........((((((((...)))).))))...............................................................(((.....)))........|||||||||||||||||||||||||.......................	0.553571	0	0.553571	0.553571	0	0.553571	0.553571	0	0.553571	0	0	0
209	.	.	.	.	.....(((((..((((.(((.((((..((((((.((((((.(((...((.........((((((((...)))).))))...............................................................(((.....)))........|||||||||||||||||||||||||........................	0.720238	-0.142857	0.577381	0.720238	-0.142857	0.577381	0.720238	-0.142857	0.577381	0	0	0
210	.	.	.	.	.....(((((..((((.(((.((((..((((((.((((((.(((...((.........((((((((...)))).))))...............................................................(((.....)))........|||||||||||||||||||||||||.........................	0.886905	-0.142857	0.744048	0.886905	-0.142857	0.744048	0.886905	-0.142857	0.744048	0	0	0
211	.	.	.	.	.....(((((..((((.(((.((((..((((((.((((((.(((...((.........((((((((...)))).))))...............................................................(((.....)))........|||||||||||||||||||||||||..........................	0.744048	-0.142857	0.60119	0.744048	-0.142857	0.60119	0.744048	-0.142857	0.60119	0	0	0
212	.	.	.	.	.....(((((..((((.(((.((((..((((((.((((((.(((...((.........((((((((...)))).))))...............................................................(((.....)))........|||||||||||||||||||||||||...........................	0.619048	-0.142857	0.47619	0.619048	-0.142857	0.47619	0.619048	-0.142857	0.47619	0	0	0
213	.	.	.	.	.....(((((..((((.(((.((((..((((((.((((((.(((...((.........((((((((...)))).))))...............................................................(((.....)))........|||||||||||||||||||||||||............................	0.619048	-0.142857	0.47619	0.619048	-0.142857	0.47619	0.619048	-0.142857	0.47619	0	0	0
214	.	)	.	)	.....(((((..((((.(((.((((..((((((.((((((.(((...((.........((((((((...)))).))))...............................................................(((.....)))........|||||||||||||||||||||||||............................)	0.619048	-0.285714	0.333333	0.619048	-0.285714	0.333333	0	0	0	-0.619048	0.285714	-0.333333
215	.	)	.	)	.....(((((..((((.(((.((((..((((((.((((((.(((...((.........((((((((...)))).))))...............................................................(((.....)))........|||||||||||||||||||||||||............................))	0.166667	-0.285714	-0.119048	0.166667	-0.285714	-0.119048	0	0	0	-0.166667	0.285714	0.119048
216	.	.	.	.	.....(((((..((((.(((.((((..((((((.((((((.(((...((.........((((((((...)))).))))...............................................................(((.....)))........|||||||||||||||||||||||||............................)).	0	-0.142857	-0.142857	0	-0.142857	-0.142857	0	-0.142857	-0.142857	0	0	0
217	.	.	.	.	.....(((((..((((.(((.((((..((((((.((((((.(((...((.........((((((((...)))).))))...............................................................(((.....)))........|||||||||||||||||||||||||............................))..	0	-0.309524	-0.309524	0	-0.309524	-0.309524	0	-0.309524	-0.309524	0	0	0
218	.	.	.	.	.....(((((..((((.(((.((((..((((((.((((((.(((...((.........((((((((...)))).))))...............................................................(((.....)))........|||||||||||||||||||||||||............................))...	0	-0.309524	-0.309524	0	-0.309524	-0.309524	0	-0.309524	-0.309524	0	0	0
219	)	)	.	)	.....(((((..((((.(((.((((..((((((.((((((.(((...((.........((((((((...)))).))))...............................................................(((.....)))........|||||||||||||||||||||||||............................))...)	0.291667	-0.309524	-0.0178571	0	0	0	0	0	0	0	0	0
220	)	)	.	)	.....(((((..((((.(((.((((..((((((.((((((.(((...((.........((((((((...)))).))))...............................................................(((.....)))........|||||||||||||||||||||||||............................))...))	0.458333	-0.309524	0.14881	0	0	0	0	0	0	0	0	0
221	)	)	.	)	.....(((((..((((.(((.((((..((((((.((((((.(((...((.........((((((((...)))).))))...............................................................(((.....)))........|||||||||||||||||||||||||............................))...)))	0.625	-0.166667	0.458333	0	0	0	0	0	0	0	0	0
222	)	)	.	)	.....(((((..((((.(((.((((..((((((.((((((.(((...((.........((((((((...)))).))))...............................................................(((.....)))........|||||||||||||||||||||||||............................))...))))	0.791667	-0.291667	0.5	0	0	0	0	0	0	0	0	0
223	)	)	.	)	.....(((((..((((.(((.((((..((((((.((((((.(((...((.........((((((((...)))).))))...............................................................(((.....)))........|||||||||||||||||||||||||............................))...)))))	0.958333	-0.125	0.833333	0	0	0	0	0	0	0	0	0
224	)	)	.	)	.....(((((..((((.(((.((((..((((((.((((((.(((...((.........((((((((...)))).))))...............................................................(((.....)))........|||||||||||||||||||||||||............................))...))))))	1.25	-0.25	1	0	0	0	0	0	0	0	0	0
225	)	)	.	)	.....(((((..((((.(((.((((..((((((.((((((.(((...((.........((((((((...)))).))))...............................................................(((.....)))........|||||||||||||||||||||||||............................))...)))))))	1.25	-0.375	0.875	0	0	0	0	0	0	0	0	0
226	)	)	.	)	.....(((((..((((.(((.((((..((((((.((((((.(((...((.........((((((((...)))).))))...............................................................(((.....)))........|||||||||||||||||||||||||............................))...))))))))	1.36905	-0.375	0.994048	0	0	0	0	0	0	0	0	0
227	)	)	.	)	.....(((((..((((.(((.((((..((((((.((((((.(((...((.........((((((((...)))).))))...............................................................(((.....)))........|||||||||||||||||||||||||............................))...)))))))))	1.07738	-0.375	0.702381	0	0	0	0	0	0	0	0	0
228	.	.	.	.	.....(((((..((((.(((.((((..((((((.((((((.(((...((.........((((((((...)))).))))...............................................................(((.....)))........|||||||||||||||||||||||||............................))...))))))))).	1.07738	-0.375	0.702381	1.07738	-0.375	0.702381	1.07738	-0.375	0.702381	0	0	0
229	.	.	.	.	.....(((((..((((.(((.((((..((((((.((((((.(((...((.........((((((((...)))).))))...............................................................(((.....)))........|||||||||||||||||||||||||............................))...)))))))))..	0.910714	-0.375	0.535714	0.910714	-0.375	0.535714	0.910714	-0.375	0.535714	0	0	0
230	.	.	.	.	.....(((((..((((.(((.((((..((((((.((((((.(((...((.........((((((((...)))).))))...............................................................(((.....)))........|||||||||||||||||||||||||............................))...)))))))))...	0.744048	-0.25	0.494048	0.744048	-0.25	0.494048	0.744048	-0.25	0.494048	0	0	0
231	)	)	.	)	.....(((((..((((.(((.((((..((((((.((((((.(((...((.........((((((((...)))).))))...............................................................(((.....)))........|||||||||||||||||||||||||............................))...)))))))))...)	0.577381	-0.25	0.327381	0	0	0	0	0	0	0	0	0
232	)	)	.	)	.....(((((..((((.(((.((((..((((((.((((((.(((...((.........((((((((...)))).))))...............................................................(((.....)))........|||||||||||||||||||||||||............................))...)))))))))...))	0.452381	-0.125	0.327381	0	0	0	0	0	0	0	0	0
233	)	)	.	)	.....(((((..((((.(((.((((..((((((.((((((.(((...((.........((((((((...)))).))))...............................................................(((.....)))........|||||||||||||||||||||||||............................))...)))))))))...)))	0.166667	0	0.166667	0	0	0	0	0	0	0	0	0
234	)	)	.	)	.....(((((..((((.(((.((((..((((((.((((((.(((...((.........((((((((...)))).))))...............................................................(((.....)))........|||||||||||||||||||||||||............................))...)))))))))...))))	0	0	0	0	0	0	0	0	0	0	0	0
235	)	)	.	)	.....(((((..((((.(((.((((..((((((.((((((.(((...((.........((((((((...)))).))))...............................................................(((.....)))........|||||||||||||||||||||||||............................))...)))))))))...)))))	0	0	0	0	0	0	0	0	0	0	0	0
236	)	)	.	)	.....(((((..((((.(((.((((..((((((.((((((.(((...((.........((((((((...)))).))))...............................................................(((.....)))........|||||||||||||||||||||||||............................))...)))))))))...))))))	0	0	0	0	0	0	0	0	0	0	0	0
237	)	)	.	)	.....(((((..((((.(((.((((..((((((.((((((.(((...((.........((((((((...)))).))))...............................................................(((.....)))........|||||||||||||||||||||||||............................))...)))))))))...)))))))	0	0	0	0	0	0	0	0	0	0	0	0
238	)	)	.	)	.....(((((..((((.(((.((((..((((((.((((((.(((...((.........((((((((...)))).))))...............................................................(((.....)))........|||||||||||||||||||||||||............................))...)))))))))...))))))))	0	0	0	0	0	0	0	0	0	0	0	0
239	)	)	.	)	.....(((((..((((.(((.((((..((((((.((((((.(((...((.........((((((((...)))).))))...............................................................(((.....)))........|||||||||||||||||||||||||............................))...)))))))))...)))))))))	0	0	0	0	0	0	0	0	0	0	0	0
240	)	)	.	)	.....(((((..((((.(((.((((..((((((.((((((.(((...((.........((((((((...)))).))))...............................................................(((.....)))........|||||||||||||||||||||||||............................))...)))))))))...))))))))))	0	0	0	0	0	0	0	0	0	0	0	0
241	.	.	.	.	.....(((((..((((.(((.((((..((((((.((((((.(((...((.........((((((((...)))).))))...............................................................(((.....)))........|||||||||||||||||||||||||............................))...)))))))))...)))))))))).	0	0	0	0	0	0	0	0	0	0	0	0
242	)	)	.	)	.....(((((..((((.(((.((((..((((((.((((((.(((...((.........((((((((...)))).))))...............................................................(((.....)))........|||||||||||||||||||||||||............................))...)))))))))...)))))))))).)	0	0	0	0	0	0	0	0	0	0	0	0
243	)	)	.	)	.....(((((..((((.(((.((((..((((((.((((((.(((...((.........((((((((...)))).))))...............................................................(((.....)))........|||||||||||||||||||||||||............................))...)))))))))...)))))))))).))	0	0	0	0	0	0	0	0	0	0	0	0
244	)	)	.	)	.....(((((..((((.(((.((((..((((((.((((((.(((...((.........((((((((...)))).))))...............................................................(((.....)))........|||||||||||||||||||||||||............................))...)))))))))...)))))))))).)))	0	0	0	0	0	0	0	0	0	0	0	0
245	.	)	.	)	.....(((((..((((.(((.((((..((((((.((((((.(((...((.........((((((((...)))).))))...............................................................(((.....)))........|||||||||||||||||||||||||............................))...)))))))))...)))))))))).))))	0	0	0	0	0	0	0	0	0	0	0	0
246	)	)	.	)	.....(((((..((((.(((.((((..((((((.((((((.(((...((.........((((((((...)))).))))...............................................................(((.....)))........|||||||||||||||||||||||||............................))...)))))))))...)))))))))).)))))	0	0	0	0	0	0	0	0	0	0	0	0
247	)	)	.	)	.....(((((..((((.(((.((((..((((((.((((((.(((...((.........((((((((...)))).))))...............................................................(((.....)))........|||||||||||||||||||||||||............................))...)))))))))...)))))))))).))))))	0	0	0	0	0	0	0	0	0	0	0	0
248	)	)	.	)	.....(((((..((((.(((.((((..((((((.((((((.(((...((.........((((((((...)))).))))...............................................................(((.....)))........|||||||||||||||||||||||||............................))...)))))))))...)))))))))).)))))))	0	0	0	0	0	0	0	0	0	0	0	0
249	.	.	.	.	.....(((((..((((.(((.((((..((((((.((((((.(((...((.........((((((((...)))).))))...............................................................(((.....)))........|||||||||||||||||||||||||............................))...)))))))))...)))))))))).))))))).	0	0	0	0	0	0	0	0	0	0	0	0
250	.	.	.	.	.....(((((..((((.(((.((((..((((((.((((((.(((...((.........((((((((...)))).))))...............................................................(((.....)))........|||||||||||||||||||||||||............................))...)))))))))...)))))))))).)))))))..	0	0	0	0	0	0	0	0	0	0	0	0
251	)	)	.	)	.....(((((..((((.(((.((((..((((((.((((((.(((...((.........((((((((...)))).))))...............................................................(((.....)))........|||||||||||||||||||||||||............................))...)))))))))...)))))))))).)))))))..)	0	0	0	0	0	0	0	0	0	0	0	0
252	)	)	.	)	.....(((((..((((.(((.((((..((((((.((((((.(((...((.........((((((((...)))).))))...............................................................(((.....)))........|||||||||||||||||||||||||............................))...)))))))))...)))))))))).)))))))..))	0	0	0	0	0	0	0	0	0	0	0	0
253	)	)	.	)	.....(((((..((((.(((.((((..((((((.((((((.(((...((.........((((((((...)))).))))...............................................................(((.....)))........|||||||||||||||||||||||||............................))...)))))))))...)))))))))).)))))))..)))	0	0	0	0	0	0	0	0	0	0	0	0
254	)	)	.	)	.....(((((..((((.(((.((((..((((((.((((((.(((...((.........((((((((...)))).))))...............................................................(((.....)))........|||||||||||||||||||||||||............................))...)))))))))...)))))))))).)))))))..))))	0	0	0	0	0	0	0	0	0	0	0	0
255	)	)	.	)	.....(((((..((((.(((.((((..((((((.((((((.(((...((.........((((((((...)))).))))...............................................................(((.....)))........|||||||||||||||||||||||||............................))...)))))))))...)))))))))).)))))))..)))))	0	0	0	0	0	0	0	0	0	0	0	0
256	.	.	.	.	.....(((((..((((.(((.((((..((((((.((((((.(((...((.........((((((((...)))).))))...............................................................(((.....)))........|||||||||||||||||||||||||............................))...)))))))))...)))))))))).)))))))..))))).	0	0	0	0	0	0	0	0	0	0	0	0
257	.	.	.	.	.....(((((..((((.(((.((((..((((((.((((((.(((...((.........((((((((...)))).))))...............................................................(((.....)))........|||||||||||||||||||||||||............................))...)))))))))...)))))))))).)))))))..)))))..	0	0	0	0	0	0	0	0	0	0	0	0
258	.	.	.	.	.....(((((..((((.(((.((((..((((((.((((((.(((...((.........((((((((...)))).))))...............................................................(((.....)))........|||||||||||||||||||||||||............................))...)))))))))...)))))))))).)))))))..)))))...	0	0	0	0	0	0	0	0	0	0	0	0
259	.	.	.	.	.....(((((..((((.(((.((((..((((((.((((((.(((...((.........((((((((...)))).))))...............................................................(((.....)))........|||||||||||||||||||||||||............................))...)))))))))...)))))))))).)))))))..)))))....	0	0	0	0	0	0	0	0	0	0	0	0
260	.	.	.	.	.....(((((..((((.(((.((((..((((((.((((((.(((...((.........((((((((...)))).))))...............................................................(((.....)))........|||||||||||||||||||||||||............................))...)))))))))...)))))))))).)))))))..))))).....	0	0	0	0	0	0	0	0	0	0	0	0
261	.	.	.	.	.....(((((..((((.(((.((((..((((((.((((((.(((...((.........((((((((...)))).))))...............................................................(((.....)))........|||||||||||||||||||||||||............................))...)))))))))...)))))))))).)))))))..)))))......	0	0	0	0	0	0	0	0	0	0	0	0
262	.	.	.	.	.....(((((..((((.(((.((((..((((((.((((((.(((...((.........((((((((...)))).))))...............................................................(((.....)))........|||||||||||||||||||||||||............................))...)))))))))...)))))))))).)))))))..))))).......	0	0	0	0	0	0	0	0	0	0	0	0
263	.	.	.	.	.....(((((..((((.(((.((((..((((((.((((((.(((...((.........((((((((...)))).))))...............................................................(((.....)))........|||||||||||||||||||||||||............................))...)))))))))...)))))))))).)))))))..)))))........	0	0	0	0	0	0	0	0	0	0	0	0
264	.	.	.	.	.....(((((..((((.(((.((((..((((((.((((((.(((...((.........((((((((...)))).))))...............................................................(((.....)))........|||||||||||||||||||||||||............................))...)))))))))...)))))))))).)))))))..))))).........	0	0	0	0	0	0	0	0	0	0	0	0
265	.	.	.	.	.....(((((..((((.(((.((((..((((((.((((((.(((...((.........((((((((...)))).))))...............................................................(((.....)))........|||||||||||||||||||||||||............................))...)))))))))...)))))))))).)))))))..)))))..........	0	0	0	0	0	0	0	0	0	0	0	0
266	.	.	.	.	.....(((((..((((.(((.((((..((((((.((((((.(((...((.........((((((((...)))).))))...............................................................(((.....)))........|||||||||||||||||||||||||............................))...)))))))))...)))))))))).)))))))..)))))...........	0	0	0	0	0	0	0	0	0	0	0	0
267	.	.	.	.	.....(((((..((((.(((.((((..((((((.((((((.(((...((.........((((((((...)))).))))...............................................................(((.....)))........|||||||||||||||||||||||||............................))...)))))))))...)))))))))).)))))))..)))))............	0	0	0	0	0	0	0	0	0	0	0	0
268	.	.	.	.	.....(((((..((((.(((.((((..((((((.((((((.(((...((.........((((((((...)))).))))...............................................................(((.....)))........|||||||||||||||||||||||||............................))...)))))))))...)))))))))).)))))))..))))).............	0	0	0	0	0	0	0	0	0	0	0	0
269	.	.	.	.	.....(((((..((((.(((.((((..((((((.((((((.(((...((.........((((((((...)))).))))...............................................................(((.....)))........|||||||||||||||||||||||||............................))...)))))))))...)))))))))).)))))))..)))))..............	0	0	0	0	0	0	0	0	0	0	0	0
270	.	.	.	.	.....(((((..((((.(((.((((..((((((.((((((.(((...((.........((((((((...)))).))))...............................................................(((.....)))........|||||||||||||||||||||||||............................))...)))))))))...)))))))))).)))))))..)))))...............	0	0	0	0	0	0	0	0	0	0	0	0
271	.	.	.	.	.....(((((..((((.(((.((((..((((((.((((((.(((...((.........((((((((...)))).))))...............................................................(((.....)))........|||||||||||||||||||||||||............................))...)))))))))...)))))))))).)))))))..)))))................	0	0	0	0	0	0	0	0	0	0	0	0
272	.	.	.	.	.....(((((..((((.(((.((((..((((((.((((((.(((...((.........((((((((...)))).))))...............................................................(((.....)))........|||||||||||||||||||||||||............................))...)))))))))...)))))))))).)))))))..))))).................	0	0	0	0	0	0	0	0	0	0	0	0
273	.	.	.	.	.....(((((..((((.(((.((((..((((((.((((((.(((...((.........((((((((...)))).))))...............................................................(((.....)))........|||||||||||||||||||||||||............................))...)))))))))...)))))))))).)))))))..)))))..................	0	0	0	0	0	0	0	0	0	0	0	0
274	.	.	.	.	.....(((((..((((.(((.((((..((((((.((((((.(((...((.........((((((((...)))).))))...............................................................(((.....)))........|||||||||||||||||||||||||............................))...)))))))))...)))))))))).)))))))..)))))...................	0	0	0	0	0	0	0	0	0	0	0	0
275	.	.	.	.	.....(((((..((((.(((.((((..((((((.((((((.(((...((.........((((((((...)))).))))...............................................................(((.....)))........|||||||||||||||||||||||||............................))...)))))))))...)))))))))).)))))))..)))))....................	0	0	0	0	0	0	0	0	0	0	0	0
276	.	.	.	.	.....(((((..((((.(((.((((..((((((.((((((.(((...((.........((((((((...)))).))))...............................................................(((.....)))........|||||||||||||||||||||||||............................))...)))))))))...)))))))))).)))))))..))))).....................	0	0	0	0	0	0	0	0	0	0	0	0
277	.	.	.	.	.....(((((..((((.(((.((((..((((((.((((((.(((...((.........((((((((...)))).))))...............................................................(((.....)))........|||||||||||||||||||||||||............................))...)))))))))...)))))))))).)))))))..)))))......................	0	0	0	0	0	0	0	0	0	0	0	0
278	.	.	.	.	.....(((((..((((.(((.((((..((((((.((((((.(((...((.........((((((((...)))).))))...............................................................(((.....)))........|||||||||||||||||||||||||............................))...)))))))))...)))))))))).)))))))..))))).......................	0	0	0	0	0	0	0	0	0	0	0	0
279	.	.	.	.	.....(((((..((((.(((.((((..((((((.((((((.(((...((.........((((((((...)))).))))...............................................................(((.....)))........|||||||||||||||||||||||||............................))...)))))))))...)))))))))).)))))))..)))))........................	0	0	0	0	0	0	0	0	0	0	0	0
280	.	.	.	.	.....(((((..((((.(((.((((..((((((.((((((.(((...((.........((((((((...)))).))))...............................................................(((.....)))........|||||||||||||||||||||||||............................))...)))))))))...)))))))))).)))))))..))))).........................	0	0	0	0	0	0	0	0	0	0	0	0
281	.	.	.	.	.....(((((..((((.(((.((((..((((((.((((((.(((...((.........((((((((...)))).))))...............................................................(((.....)))........|||||||||||||||||||||||||............................))...)))))))))...)))))))))).)))))))..)))))..........................	0	0	0	0	0	0	0	0	0	0	0	0
282	.	.	.	.	.....(((((..((((.(((.((((..((((((.((((((.(((...((.........((((((((...)))).))))...............................................................(((.....)))........|||||||||||||||||||||||||............................))...)))))))))...)))))))))).)))))))..)))))...........................	0	0	0	0	0	0	0	0	0	0	0	0
283	.	.	.	.	.....(((((..((((.(((.((((..((((((.((((((.(((...((.........((((((((...)))).))))...............................................................(((.....)))........|||||||||||||||||||||||||............................))...)))))))))...)))))))))).)))))))..)))))............................	0	0	0	0	0	0	0	0	0	0	0	0
284	.	.	.	.	.....(((((..((((.(((.((((..((((((.((((((.(((...((.........((((((((...)))).))))...............................................................(((.....)))........|||||||||||||||||||||||||............................))...)))))))))...)))))))))).)))))))..))))).............................	0	0	0	0	0	0	0	0	0	0	0	0

## Sheet: SRSF2 e2 - 2ry Str + Mask
Structure 1 (no AO)	Structure 2 (H2A(+268+292))	H2A(+268+292) Mask	Structure 2 + Mask
.......(((((((((((.(((..(((.((..((......))..)).)))...))).))))))))))).........................(((.(((....))).)))..............................(((((.(((.((((.(((((((...(((....)))...)))..)))).........(((.(((.(((..((.............)).)))))))))..)))).)))...)))))...((.............)).......(((.............)))......................((((((((.(((((((((((((((.(((((((..........))))))).)).....(((..(((((.((...)).…	.......(((((((((((.(((..(((.((..............)).)))...))).))))))))))).........................(((.(((....))).)))........................................(((((((((((......................(((......))).(((.(((.(((..((.............)).)))))))))........((.((((((.((.((..(((....))).)).(((.(((((.............)))))..))).......)))))))).))................................................................))))..)))…	.................................................................................................................................................................................................................................................................................................................................................xxxxxxxxxxxxxxxxxxxxxxxxx.....................................…	.......(((((((((((.(((..(((.((..............)).)))...))).))))))))))).........................(((.(((....))).)))........................................(((((((((((......................(((......))).(((.(((.(((..((.............)).)))))))))........((.((((((.((.((..(((....))).)).(((.(((((.............)))))..))).......)))))))).))...........|||||||||||||||||||||||||............................))))..)))…

## Sheet: SRSF2 e2 - HSF3.0
Name	Seq	Score	Pos	Start	Len	S+L	ESE Frac	ESS Frac	S1 Struc	S1 Score	S2 Struc	S2 Score	∆ Score	Name	Type	ESE Score	ESS Scores
{"name": "IIE (ESS Site)"	sequence: "CTTGCT"	CV: "NA"	position: "1"}	51	6	57	0	-0.166667	...)))	0.5	...)))	0.5	0	IIE	ESS	0	0
{"name": "IIE (ESS Site)"	sequence: "TTGCTC"	CV: "NA"	position: "2"}	52	6	58	0	-0.166667	..))).	0.5	..))).	0.5	0	IIE	ESS	0	0
{"name": "ESE_SRp40 (ESE Site)"	sequence: "TTGCTCG"	CV: "79.07"	position: "2"}	52	7	59	0.142857	0	..))).)	0.428571	..))).)	0.428571	0	ESE_SRp40	ESE	0	0
{"name": "ESE_SRp55 (ESE Site)"	sequence: "CTCGTC"	CV: "76.27"	position: "5"}	55	6	61	0.166667	0	)).)))	0.166667	)).)))	0.166667	0	ESE_SRp55	ESE	0	0
{"name": "Sironi_motif3 (ESS Site)"	sequence: "CGTCCCGC"	CV: "67.87"	position: "7"}	57	8	65	0	-0.125	.)))))))	0.125	.)))))))	0.125	0	Sironi_motif3	ESS	0	0
{"name": "EIE (ESE Site)"	sequence: "CCCGCC"	CV: "NA"	position: "10"}	60	6	66	0.166667	0	))))))	0	))))))	0	0	EIE	ESE	0	0
{"name": "PESE (ESE Site)"	sequence: "CCCGCCCG"	CV: "20.40240730986"	position: "10"}	60	8	68	0.125	0	))))))))	0	))))))))	0	0	PESE	ESE	0	0
{"name": "EIE (ESE Site)"	sequence: "CCGCCC"	CV: "NA"	position: "11"}	61	6	67	0.166667	0	))))))	0	))))))	0	0	EIE	ESE	0	0
{"name": "Sironi_motif3 (ESS Site)"	sequence: "CCGCCCGC"	CV: "66.88"	position: "11"}	61	8	69	0	-0.125	))))))))	0	))))))))	0	0	Sironi_motif3	ESS	0	0
{"name": "PESE (ESE Site)"	sequence: "CCGCCCGC"	CV: "0.7581947664652"	position: "11"}	61	8	69	0.125	0	))))))))	0	))))))))	0	0	PESE	ESE	0	0
{"name": "ESE_ASF (ESE Site)"	sequence: "CGCCCGC"	CV: "79.18"	position: "12"}	62	7	69	0.142857	0	)))))))	0	)))))))	0	0	ESE_ASF	ESE	0	0
{"name": "ESE_ASFB (ESE Site)"	sequence: "CGCCCGC"	CV: "85.77"	position: "12"}	62	7	69	0.142857	0	)))))))	0	)))))))	0	0	ESE_ASFB	ESE	0	0
{"name": "PESS (ESS Site)"	sequence: "CGCCCGCA"	CV: "-5.762363178611"	position: "12"}	62	8	70	0	-0.125	))))))).	0.125	))))))).	0.125	0	PESS	ESS	0	0
{"name": "ESE_SC35 (ESE Site)"	sequence: "GCCCGCAG"	CV: "75.37"	position: "13"}	63	8	71	0.125	0	))))))..	0.25	))))))..	0.25	0	ESE_SC35	ESE	0	0
{"name": "Sironi_motif3 (ESS Site)"	sequence: "GCCCGCAG"	CV: "61.3"	position: "13"}	63	8	71	0	-0.125	))))))..	0.25	))))))..	0.25	0	Sironi_motif3	ESS	0	0
{"name": "PESE (ESE Site)"	sequence: "GCCCGCAG"	CV: "10.83994541661"	position: "13"}	63	8	71	0.125	0	))))))..	0.25	))))))..	0.25	0	PESE	ESE	0	0
{"name": "ESE_SRp55 (ESE Site)"	sequence: "CGCAGC"	CV: "81.9"	position: "16"}	66	6	72	0.166667	0	)))...	0.5	)))...	0.5	0	ESE_SRp55	ESE	0	0
{"name": "ESE_ASFB (ESE Site)"	sequence: "CGCAGCC"	CV: "74.61"	position: "16"}	66	7	73	0.142857	0	)))....	0.571429	)))....	0.571429	0	ESE_ASFB	ESE	0	0
{"name": "ESE_9G8 (ESE Site)"	sequence: "GCAGCC"	CV: "63.23"	position: "17"}	67	6	73	0.166667	0	))....	0.666667	))....	0.666667	0	ESE_9G8	ESE	0	0
{"name": "EIE (ESE Site)"	sequence: "CAGCCC"	CV: "NA"	position: "18"}	68	6	74	0.166667	0	).....	0.833333	).....	0.833333	0	EIE	ESE	0	0
{"name": "ESE_ASF (ESE Site)"	sequence: "CAGCCCT"	CV: "76.15"	position: "18"}	68	7	75	0.142857	0	)......	0.857143	)......	0.857143	0	ESE_ASF	ESE	0	0
{"name": "ESE_ASFB (ESE Site)"	sequence: "CAGCCCT"	CV: "77.08"	position: "18"}	68	7	75	0.142857	0	)......	0.857143	)......	0.857143	0	ESE_ASFB	ESE	0	0
{"name": "Sironi_motif3 (ESS Site)"	sequence: "CAGCCCTA"	CV: "60.93"	position: "18"}	68	8	76	0	-0.125	).......	0.875	).......	0.875	0	Sironi_motif3	ESS	0	0
{"name": "EIE (ESE Site)"	sequence: "AGCCCT"	CV: "NA"	position: "19"}	69	6	75	0.166667	0	......	1	......	1	0	EIE	ESE	0	0
{"name": "EIE (ESE Site)"	sequence: "GCCCTA"	CV: "NA"	position: "20"}	70	6	76	0.166667	0	......	1	......	1	0	EIE	ESE	0	0
{"name": "EIE (ESE Site)"	sequence: "CCCTAG"	CV: "NA"	position: "21"}	71	6	77	0.166667	0	......	1	......	1	0	EIE	ESE	0	0
{"name": "ESS_hnRNPA1 (ESS Site)"	sequence: "TAGGCG"	CV: "87.51"	position: "24"}	74	6	80	0	-0.166667	......	1	......	1	0	ESS_hnRNPA1	ESS	0	0
{"name": "PESE (ESE Site)"	sequence: "AGGCGGCG"	CV: "13.92125226567"	position: "25"}	75	8	83	0.125	0	........	1	........	1	0	PESE	ESE	0	0
{"name": "ESE_9G8 (ESE Site)"	sequence: "GGCGGC"	CV: "70.34"	position: "26"}	76	6	82	0.166667	0	......	1	......	1	0	ESE_9G8	ESE	0	0
{"name": "Sironi_motif2 (ESS Site)"	sequence: "GGCGGCG"	CV: "67.96"	position: "26"}	76	7	83	0	-0.142857	.......	1	.......	1	0	Sironi_motif2	ESS	0	0
{"name": "PESS (ESS Site)"	sequence: "GGCGGCGT"	CV: "-3.528840849609"	position: "26"}	76	8	84	0	-0.125	........	1	........	1	0	PESS	ESS	0	0
{"name": "PESE (ESE Site)"	sequence: "GCGGCGTC"	CV: "7.381200253838"	position: "27"}	77	8	85	0.125	0	........	1	........	1	0	PESE	ESE	0	0
{"name": "ESE_9G8 (ESE Site)"	sequence: "GGCGTC"	CV: "66.92"	position: "29"}	79	6	85	0.166667	0	......	1	......	1	0	ESE_9G8	ESE	0	0
{"name": "ESE_SRp55 (ESE Site)"	sequence: "GGCGTC"	CV: "78.38"	position: "29"}	79	6	85	0.166667	0	......	1	......	1	0	ESE_SRp55	ESE	0	0
{"name": "RESCUE ESE (ESE Site)"	sequence: "CGTCGC"	CV: "NA"	position: "31"}	81	6	87	0.166667	0	......	1	......	1	0	RESCUE ESE	ESE	0	0
{"name": "PESE (ESE Site)"	sequence: "CGTCGCCG"	CV: "21.75828186761"	position: "31"}	81	8	89	0.125	0	........	1	........	1	0	PESE	ESE	0	0
{"name": "ESE_9G8 (ESE Site)"	sequence: "GTCGCC"	CV: "62.62"	position: "32"}	82	6	88	0.166667	0	......	1	......	1	0	ESE_9G8	ESE	0	0
{"name": "PESE (ESE Site)"	sequence: "GTCGCCGC"	CV: "4.922044471358"	position: "32"}	82	8	90	0.125	0	........	1	........	1	0	PESE	ESE	0	0
{"name": "Sironi_motif3 (ESS Site)"	sequence: "TCGCCGCA"	CV: "61.29"	position: "33"}	83	8	91	0	-0.125	........	1	........	1	0	Sironi_motif3	ESS	0	0
{"name": "ESE_ASF (ESE Site)"	sequence: "CGCCGCA"	CV: "73.47"	position: "34"}	84	7	91	0.142857	0	.......	1	.......	1	0	ESE_ASF	ESE	0	0
{"name": "ESE_ASFB (ESE Site)"	sequence: "CGCCGCA"	CV: "82.38"	position: "34"}	84	7	91	0.142857	0	.......	1	.......	1	0	ESE_ASFB	ESE	0	0
{"name": "ESE_SC35 (ESE Site)"	sequence: "CGCCGCAG"	CV: "75.37"	position: "34"}	84	8	92	0.125	0	........	1	........	1	0	ESE_SC35	ESE	0	0
{"name": "PESE (ESE Site)"	sequence: "GCCGCAGC"	CV: "2.9203771065"	position: "35"}	85	8	93	0.125	0	........	1	........	1	0	PESE	ESE	0	0
{"name": "ESE_SRp55 (ESE Site)"	sequence: "CGCAGC"	CV: "81.9"	position: "37"}	87	6	93	0.166667	0	......	1	......	1	0	ESE_SRp55	ESE	0	0
{"name": "ESE_ASFB (ESE Site)"	sequence: "CGCAGCC"	CV: "74.61"	position: "37"}	87	7	94	0.142857	0	.......	1	.......	1	0	ESE_ASFB	ESE	0	0
{"name": "PESS (ESS Site)"	sequence: "CGCAGCCG"	CV: "-2.363344518227"	position: "37"}	87	8	95	0	-0.125	.......(	0.875	.......(	0.875	0	PESS	ESS	0	0
{"name": "ESE_9G8 (ESE Site)"	sequence: "GCAGCC"	CV: "63.23"	position: "38"}	88	6	94	0.166667	0	......	1	......	1	0	ESE_9G8	ESE	0	0
{"name": "ESE_ASF (ESE Site)"	sequence: "CAGCCGA"	CV: "93.16"	position: "39"}	89	7	96	0.142857	0	.....((	0.714286	.....((	0.714286	0	ESE_ASF	ESE	0	0
{"name": "ESE_ASFB (ESE Site)"	sequence: "CAGCCGA"	CV: "91.54"	position: "39"}	89	7	96	0.142857	0	.....((	0.714286	.....((	0.714286	0	ESE_ASFB	ESE	0	0
{"name": "ESE_9G8 (ESE Site)"	sequence: "GCCGAT"	CV: "68.93"	position: "41"}	91	6	97	0.166667	0	...(((	0.5	...(((	0.5	0	ESE_9G8	ESE	0	0
{"name": "ESE_SC35 (ESE Site)"	sequence: "CGATCCCG"	CV: "75.55"	position: "43"}	93	8	101	0.125	0	.(((.(((	0.25	.(((.(((	0.25	0	ESE_SC35	ESE	0	0
{"name": "ESE_SC35 (ESE Site)"	sequence: "GATCCCGG"	CV: "79.61"	position: "44"}	94	8	102	0.125	0	(((.(((.	0.25	(((.(((.	0.25	0	ESE_SC35	ESE	0	0
{"name": "Sironi_motif3 (ESS Site)"	sequence: "GATCCCGG"	CV: "66.76"	position: "44"}	94	8	102	0	-0.125	(((.(((.	0.25	(((.(((.	0.25	0	Sironi_motif3	ESS	0	0
{"name": "Sironi_motif1 (ESS Site)"	sequence: "CCGGAGTC"	CV: "61.34"	position: "48"}	98	8	106	0	-0.125	(((....)	0.5	(((....)	0.5	0	Sironi_motif1	ESS	0	0
{"name": "ESE_ASFB (ESE Site)"	sequence: "CGGAGTC"	CV: "72.46"	position: "49"}	99	7	106	0.142857	0	((....)	0.571429	((....)	0.571429	0	ESE_ASFB	ESE	0	0
{"name": "ESE_9G8 (ESE Site)"	sequence: "GGAGTC"	CV: "67.52"	position: "50"}	100	6	106	0.166667	0	(....)	0.666667	(....)	0.666667	0	ESE_9G8	ESE	0	0
{"name": "Sironi_motif2 (ESS Site)"	sequence: "GGAGTCG"	CV: "60.55"	position: "50"}	100	7	107	0	-0.142857	(....))	0.571429	(....))	0.571429	0	Sironi_motif2	ESS	0	0
{"name": "Sironi_motif2 (ESS Site)"	sequence: "AGTCGGA"	CV: "67.68"	position: "52"}	102	7	109	0	-0.142857	...))).	0.571429	...))).	0.571429	0	Sironi_motif2	ESS	0	0
{"name": "ESE_ASFB (ESE Site)"	sequence: "CGGAGTC"	CV: "72.46"	position: "55"}	105	7	112	0.142857	0	))).)))	0.142857	))).)))	0.142857	0	ESE_ASFB	ESE	0	0
{"name": "ESE_9G8 (ESE Site)"	sequence: "GGAGTC"	CV: "67.52"	position: "56"}	106	6	112	0.166667	0	)).)))	0.166667	)).)))	0.166667	0	ESE_9G8	ESE	0	0
{"name": "Sironi_motif2 (ESS Site)"	sequence: "GGAGTCG"	CV: "60.55"	position: "56"}	106	7	113	0	-0.142857	)).))).	0.285714	)).))).	0.285714	0	Sironi_motif2	ESS	0	0
{"name": "ESE_ASF (ESE Site)"	sequence: "GAGTCGT"	CV: "73.42"	position: "57"}	107	7	114	0.142857	0	).)))..	0.428571	).)))..	0.428571	0	ESE_ASF	ESE	0	0
{"name": "Fas ESS (ESS Site)"	sequence: "AGTCGT"	CV: "NA"	position: "58"}	108	6	114	0	-0.166667	.)))..	0.5	.)))..	0.5	0	Fas ESS	ESS	0	0
{"name": "Fas ESS (ESS Site)"	sequence: "GTCGTT"	CV: "NA"	position: "59"}	109	6	115	0	-0.166667	)))...	0.5	)))...	0.5	0	Fas ESS	ESS	0	0
{"name": "Fas ESS (ESS Site)"	sequence: "TCGTTC"	CV: "NA"	position: "60"}	110	6	116	0	-0.166667	))....	0.666667	))....	0.666667	0	Fas ESS	ESS	0	0
{"name": "Fas ESS (ESS Site)"	sequence: "CGTTCC"	CV: "NA"	position: "61"}	111	6	117	0	-0.166667	).....	0.833333	).....	0.833333	0	Fas ESS	ESS	0	0
{"name": "ESE_SC35 (ESE Site)"	sequence: "CGTTCCAG"	CV: "75.92"	position: "61"}	111	8	119	0.125	0	).......	0.875	).......	0.875	0	ESE_SC35	ESE	0	0
{"name": "Sironi_motif3 (ESS Site)"	sequence: "CGTTCCAG"	CV: "63.88"	position: "61"}	111	8	119	0	-0.125	).......	0.875	).......	0.875	0	Sironi_motif3	ESS	0	0
{"name": "ESE_SRp40 (ESE Site)"	sequence: "TTCCAGG"	CV: "83.68"	position: "63"}	113	7	120	0.142857	0	.......	1	.......	1	0	ESE_SRp40	ESE	0	0
{"name": "ESS_hnRNPA1 (ESS Site)"	sequence: "CAGGTC"	CV: "71.55"	position: "66"}	116	6	122	0	-0.166667	......	1	......	1	0	ESS_hnRNPA1	ESS	0	0
{"name": "ESE_SC35 (ESE Site)"	sequence: "GTCTCGCA"	CV: "81.88"	position: "69"}	119	8	127	0.125	0	........	1	........	1	0	ESE_SC35	ESE	0	0
{"name": "Sironi_motif3 (ESS Site)"	sequence: "TCTCGCAG"	CV: "84.02"	position: "70"}	120	8	128	0	-0.125	........	1	........	1	0	Sironi_motif3	ESS	0	0
{"name": "ESE_SRp40 (ESE Site)"	sequence: "TCGCAGC"	CV: "79.19"	position: "72"}	122	7	129	0.142857	0	.......	1	.......	1	0	ESE_SRp40	ESE	0	0
{"name": "ESE_SRp55 (ESE Site)"	sequence: "CGCAGC"	CV: "81.9"	position: "73"}	123	6	129	0.166667	0	......	1	......	1	0	ESE_SRp55	ESE	0	0
{"name": "ESE_ASFB (ESE Site)"	sequence: "CGCAGCC"	CV: "74.61"	position: "73"}	123	7	130	0.142857	0	.......	1	.......	1	0	ESE_ASFB	ESE	0	0
{"name": "PESS (ESS Site)"	sequence: "CGCAGCCG"	CV: "-2.363344518227"	position: "73"}	123	8	131	0	-0.125	........	1	........	1	0	PESS	ESS	0	0
{"name": "ESE_9G8 (ESE Site)"	sequence: "GCAGCC"	CV: "63.23"	position: "74"}	124	6	130	0.166667	0	......	1	......	1	0	ESE_9G8	ESE	0	0
{"name": "ESE_ASF (ESE Site)"	sequence: "CAGCCGA"	CV: "93.16"	position: "75"}	125	7	132	0.142857	0	.......	1	.......	1	0	ESE_ASF	ESE	0	0
{"name": "ESE_ASFB (ESE Site)"	sequence: "CAGCCGA"	CV: "91.54"	position: "75"}	125	7	132	0.142857	0	.......	1	.......	1	0	ESE_ASFB	ESE	0	0
{"name": "ESE_9G8 (ESE Site)"	sequence: "GCCGAT"	CV: "68.93"	position: "77"}	127	6	133	0.166667	0	......	1	......	1	0	ESE_9G8	ESE	0	0
{"name": "Sironi_motif3 (ESS Site)"	sequence: "TCTCGCTA"	CV: "78.32"	position: "82"}	132	8	140	0	-0.125	........	1	........	1	0	Sironi_motif3	ESS	0	0
{"name": "EIE (ESE Site)"	sequence: "TCGCTA"	CV: "NA"	position: "84"}	134	6	140	0.166667	0	......	1	......	1	0	EIE	ESE	0	0
{"name": "EIE (ESE Site)"	sequence: "CGCTAC"	CV: "NA"	position: "85"}	135	6	141	0.166667	0	......	1	......	1	0	EIE	ESE	0	0
{"name": "ESE_SC35 (ESE Site)"	sequence: "CGCTACAG"	CV: "76.53"	position: "85"}	135	8	143	0.125	0	.......(	0.875	........	1	0.125	ESE_SC35	ESE	0.125	0
{"name": "EIE (ESE Site)"	sequence: "GCTACA"	CV: "NA"	position: "86"}	136	6	142	0.166667	0	......	1	......	1	0	EIE	ESE	0	0
{"name": "EIE (ESE Site)"	sequence: "CTACAG"	CV: "NA"	position: "87"}	137	6	143	0.166667	0	.....(	0.833333	......	1	0.166667	EIE	ESE	0.166667	0
{"name": "ESE_SRp40 (ESE Site)"	sequence: "CTACAGC"	CV: "90.8"	position: "87"}	137	7	144	0.142857	0	.....((	0.714286	.......	1	0.285714	ESE_SRp40	ESE	0.285714	0
{"name": "Sironi_motif1 (ESS Site)"	sequence: "CTACAGCC"	CV: "67.96"	position: "87"}	137	8	145	0	-0.125	.....(((	0.625	........	1	0.375	Sironi_motif1	ESS	0	0.375
{"name": "ESE_SRp55 (ESE Site)"	sequence: "TACAGC"	CV: "83.31"	position: "88"}	138	6	144	0.166667	0	....((	0.666667	......	1	0.333333	ESE_SRp55	ESE	0.333333	0
{"name": "ESS_hnRNPA1 (ESS Site)"	sequence: "TACAGC"	CV: "67.75"	position: "88"}	138	6	144	0	-0.166667	....((	0.666667	......	1	0.333333	ESS_hnRNPA1	ESS	0	0.333333
{"name": "EIE (ESE Site)"	sequence: "TACAGC"	CV: "NA"	position: "88"}	138	6	144	0.166667	0	....((	0.666667	......	1	0.333333	EIE	ESE	0.333333	0
{"name": "ESE_ASF (ESE Site)"	sequence: "CAGCCGC"	CV: "80.35"	position: "90"}	140	7	147	0.142857	0	..(((((	0.285714	.......	1	0.714286	ESE_ASF	ESE	0.714286	0
{"name": "ESE_ASFB (ESE Site)"	sequence: "CAGCCGC"	CV: "80.62"	position: "90"}	140	7	147	0.142857	0	..(((((	0.285714	.......	1	0.714286	ESE_ASFB	ESE	0.714286	0
{"name": "PESE (ESE Site)"	sequence: "GCCGCTCG"	CV: "1.884702964342"	position: "92"}	142	8	150	0.125	0	(((((.((	0.125	........	1	0.875	PESE	ESE	0.875	0
{"name": "ESE_SRp40 (ESE Site)"	sequence: "CCGCTCG"	CV: "78.77"	position: "93"}	143	7	150	0.142857	0	((((.((	0.142857	.......	1	0.857143	ESE_SRp40	ESE	0.857143	0
{"name": "ESE_ASF (ESE Site)"	sequence: "CGCTCGA"	CV: "83.49"	position: "94"}	144	7	151	0.142857	0	(((.(((	0.142857	.......	1	0.857143	ESE_ASF	ESE	0.857143	0
{"name": "ESE_ASFB (ESE Site)"	sequence: "CGCTCGA"	CV: "87.08"	position: "94"}	144	7	151	0.142857	0	(((.(((	0.142857	.......	1	0.857143	ESE_ASFB	ESE	0.857143	0
{"name": "Sironi_motif1 (ESS Site)"	sequence: "CTCGAAGT"	CV: "67.82"	position: "96"}	146	8	154	0	-0.125	(.(((.((	0.25	......((	0.75	0.5	Sironi_motif1	ESS	0	0.5
{"name": "ESE_9G8 (ESE Site)"	sequence: "GAAGTC"	CV: "80.41"	position: "99"}	149	6	155	0.166667	0	((.(((	0.166667	...(((	0.5	0.333333	ESE_9G8	ESE	0.333333	0
{"name": "ESE_SRp40 (ESE Site)"	sequence: "AGTCTCG"	CV: "79.07"	position: "101"}	151	7	158	0.142857	0	.((((.(	0.285714	.((((((	0.142857	-0.142857	ESE_SRp40	ESE	-0.142857	0
{"name": "PESE (ESE Site)"	sequence: "CGGTCCCG"	CV: "9.403605987582"	position: "106"}	156	8	164	0.125	0	.(((((((	0.125	(((((((.	0.125	0	PESE	ESE	0	0
{"name": "Sironi_motif3 (ESS Site)"	sequence: "GGTCCCGC"	CV: "66.3"	position: "107"}	157	8	165	0	-0.125	(((((((.	0.125	((((((..	0.25	0.125	Sironi_motif3	ESS	0	0.125
{"name": "ESE_SC35 (ESE Site)"	sequence: "GTCCCGCA"	CV: "83.29"	position: "108"}	158	8	166	0.125	0	((((((..	0.25	(((((...	0.375	0.125	ESE_SC35	ESE	0.125	0
{"name": "Sironi_motif3 (ESS Site)"	sequence: "TCCCGCAC"	CV: "69.12"	position: "109"}	159	8	167	0	-0.125	(((((...	0.375	((((....	0.5	0.125	Sironi_motif3	ESS	0	0.125
{"name": "ESE_ASFB (ESE Site)"	sequence: "CGCACTC"	CV: "77"	position: "112"}	162	7	169	0.142857	0	((...((	0.428571	(......	0.857143	0.428571	ESE_ASFB	ESE	0.428571	0
{"name": "ESE_SRp40 (ESE Site)"	sequence: "GCACTCG"	CV: "81.58"	position: "113"}	163	7	170	0.142857	0	(...(((	0.428571	.......	1	0.571429	ESE_SRp40	ESE	0.571429	0
{"name": "ESE_ASF (ESE Site)"	sequence: "CACTCGT"	CV: "84.07"	position: "114"}	164	7	171	0.142857	0	...(((.	0.571429	.......	1	0.428571	ESE_ASF	ESE	0.428571	0
{"name": "ESE_ASFB (ESE Site)"	sequence: "CACTCGT"	CV: "83.08"	position: "114"}	164	7	171	0.142857	0	...(((.	0.571429	.......	1	0.428571	ESE_ASFB	ESE	0.428571	0
{"name": "Fas ESS (ESS Site)"	sequence: "TCGTTC"	CV: "NA"	position: "117"}	167	6	173	0	-0.166667	(((...	0.5	......	1	0.5	Fas ESS	ESS	0	0.5
{"name": "Fas ESS (ESS Site)"	sequence: "CGTTCT"	CV: "NA"	position: "118"}	168	6	174	0	-0.166667	((....	0.666667	......	1	0.333333	Fas ESS	ESS	0	0.333333
{"name": "ESE_ASF (ESE Site)"	sequence: "CGGTCGA"	CV: "82.04"	position: "130"}	180	7	187	0.142857	0	)))..))	0.285714	.....((	0.714286	0.428571	ESE_ASF	ESE	0.428571	0
{"name": "ESE_ASFB (ESE Site)"	sequence: "CGGTCGA"	CV: "84.15"	position: "130"}	180	7	187	0.142857	0	)))..))	0.285714	.....((	0.714286	0.428571	ESE_ASFB	ESE	0.428571	0
{"name": "ESE_9G8 (ESE Site)"	sequence: "GTCGAC"	CV: "82.02"	position: "132"}	182	6	188	0.166667	0	)..)))	0.333333	...(((	0.5	0.166667	ESE_9G8	ESE	0.166667	0
{"name": "RESCUE ESE (ESE Site)"	sequence: "GTCGAC"	CV: "NA"	position: "132"}	182	6	188	0.166667	0	)..)))	0.333333	...(((	0.5	0.166667	RESCUE ESE	ESE	0.166667	0
{"name": "EIE (ESE Site)"	sequence: "TCGACC"	CV: "NA"	position: "133"}	183	6	189	0.166667	0	..))))	0.333333	..(((.	0.5	0.166667	EIE	ESE	0.166667	0
{"name": "EIE (ESE Site)"	sequence: "CGACCT"	CV: "NA"	position: "134"}	184	6	190	0.166667	0	.)))).	0.333333	.(((..	0.5	0.166667	EIE	ESE	0.166667	0
{"name": "EIE (ESE Site)"	sequence: "GACCTC"	CV: "NA"	position: "135"}	185	6	191	0.166667	0	))))..	0.333333	(((...	0.5	0.166667	EIE	ESE	0.166667	0
{"name": "ESE_SC35 (ESE Site)"	sequence: "GACCTCCA"	CV: "86"	position: "135"}	185	8	193	0.125	0	))))....	0.5	(((.....	0.625	0.125	ESE_SC35	ESE	0.125	0
{"name": "Sironi_motif3 (ESS Site)"	sequence: "ACCTCCAA"	CV: "63.74"	position: "136"}	186	8	194	0	-0.125	))).....	0.625	((......	0.75	0.125	Sironi_motif3	ESS	0	0.125
{"name": "Sironi_motif3 (ESS Site)"	sequence: "CCTCCAAG"	CV: "78.21"	position: "137"}	187	8	195	0	-0.125	))......	0.75	(......)	0.75	0	Sironi_motif3	ESS	0	0
{"name": "ESE_SRp40 (ESE Site)"	sequence: "CTCCAAG"	CV: "78.11"	position: "138"}	188	7	195	0.142857	0	)......	0.857143	......)	0.857143	0	ESE_SRp40	ESE	0	0
{"name": "ESE_9G8 (ESE Site)"	sequence: "CAAGTC"	CV: "61.08"	position: "141"}	191	6	197	0.166667	0	......	1	...)))	0.5	-0.5	ESE_9G8	ESE	-0.5	0
{"name": "EIE (ESE Site)"	sequence: "CCAGAT"	CV: "NA"	position: "146"}	196	6	202	0.166667	0	..(((.	0.5	).(((.	0.333333	-0.166667	EIE	ESE	-0.166667	0
{"name": "Sironi_motif1 (ESS Site)"	sequence: "CCAGATCC"	CV: "64.62"	position: "146"}	196	8	204	0	-0.125	..(((.((	0.375	).(((.((	0.25	-0.125	Sironi_motif1	ESS	0	-0.125
{"name": "RESCUE ESE (ESE Site)"	sequence: "CAGATC"	CV: "NA"	position: "147"}	197	6	203	0.166667	0	.(((.(	0.333333	.(((.(	0.333333	0	RESCUE ESE	ESE	0	0
{"name": "EIE (ESE Site)"	sequence: "CAGATC"	CV: "NA"	position: "147"}	197	6	203	0.166667	0	.(((.(	0.333333	.(((.(	0.333333	0	EIE	ESE	0	0
{"name": "EIE (ESE Site)"	sequence: "AGATCC"	CV: "NA"	position: "148"}	198	6	204	0.166667	0	(((.((	0.166667	(((.((	0.166667	0	EIE	ESE	0	0
{"name": "ESE_SC35 (ESE Site)"	sequence: "GATCCGCA"	CV: "81.57"	position: "149"}	199	8	207	0.125	0	((.(((.(	0.25	((.(((.(	0.25	0	ESE_SC35	ESE	0	0
{"name": "ESE_SRp40 (ESE Site)"	sequence: "CCGCACG"	CV: "80.26"	position: "152"}	202	7	209	0.142857	0	(((.(((	0.142857	(((.(((	0.142857	0	ESE_SRp40	ESE	0	0
{"name": "ESE_ASF (ESE Site)"	sequence: "CGCACGA"	CV: "97.76"	position: "153"}	203	7	210	0.142857	0	((.(((.	0.285714	((.(((.	0.285714	0	ESE_ASF	ESE	0	0
{"name": "ESE_ASFB (ESE Site)"	sequence: "CGCACGA"	CV: "99.85"	position: "153"}	203	7	210	0.142857	0	((.(((.	0.285714	((.(((.	0.285714	0	ESE_ASFB	ESE	0	0
{"name": "ESE_9G8 (ESE Site)"	sequence: "CACGAA"	CV: "67.79"	position: "155"}	205	6	211	0.166667	0	.(((..	0.5	.(((..	0.5	0	ESE_9G8	ESE	0	0
{"name": "RESCUE ESE (ESE Site)"	sequence: "ACGAAG"	CV: "NA"	position: "156"}	206	6	212	0.166667	0	(((..(	0.333333	(((..(	0.333333	0	RESCUE ESE	ESE	0	0
{"name": "ESE_ASF (ESE Site)"	sequence: "CGAAGGT"	CV: "78.72"	position: "157"}	207	7	214	0.142857	0	((..((.	0.428571	((..((.	0.428571	0	ESE_ASF	ESE	0	0
{"name": "ESE_ASFB (ESE Site)"	sequence: "CGAAGGT"	CV: "82.92"	position: "157"}	207	7	214	0.142857	0	((..((.	0.428571	((..((.	0.428571	0	ESE_ASFB	ESE	0	0
{"name": "Sironi_motif2 (ESS Site)"	sequence: "CGAAGGT"	CV: "60.36"	position: "157"}	207	7	214	0	-0.142857	((..((.	0.428571	((..((.	0.428571	0	Sironi_motif2	ESS	0	0
{"name": "ESE_9G8 (ESE Site)"	sequence: "GAAGGT"	CV: "70.74"	position: "158"}	208	6	214	0.166667	0	(..((.	0.5	(..((.	0.5	0	ESE_9G8	ESE	0	0
{"name": "ESS_hnRNPA1 (ESS Site)"	sequence: "GAAGGT"	CV: "70.84"	position: "158"}	208	6	214	0	-0.166667	(..((.	0.5	(..((.	0.5	0	ESS_hnRNPA1	ESS	0	0
{"name": "ESS_hnRNPA1 (ESS Site)"	sequence: "AAGGTC"	CV: "71.55"	position: "159"}	209	6	215	0	-0.166667	..((..	0.666667	..((..	0.666667	0	ESS_hnRNPA1	ESS	0	0
{"name": "ESE_SC35 (ESE Site)"	sequence: "GGTCCAAG"	CV: "82"	position: "161"}	211	8	219	0.125	0	((......	0.75	((......	0.75	0	ESE_SC35	ESE	0	0
{"name": "Sironi_motif3 (ESS Site)"	sequence: "GGTCCAAG"	CV: "62.3"	position: "161"}	211	8	219	0	-0.125	((......	0.75	((......	0.75	0	Sironi_motif3	ESS	0	0
{"name": "ESE_9G8 (ESE Site)"	sequence: "CAAGTC"	CV: "61.08"	position: "165"}	215	6	221	0.166667	0	......	1	......	1	0	ESE_9G8	ESE	0	0
{"name": "Sironi_motif3 (ESS Site)"	sequence: "AGTCCAAG"	CV: "61.03"	position: "167"}	217	8	225	0	-0.125	........	1	........	1	0	Sironi_motif3	ESS	0	0
{"name": "ESE_9G8 (ESE Site)"	sequence: "CAAGTC"	CV: "61.08"	position: "171"}	221	6	227	0.166667	0	.....)	0.833333	.....)	0.833333	0	ESE_9G8	ESE	0	0
{"name": "ESE_SRp55 (ESE Site)"	sequence: "CTCGTC"	CV: "76.27"	position: "177"}	227	6	233	0.166667	0	).))))	0.166667	).))))	0.166667	0	ESE_SRp55	ESE	0	0
{"name": "RESCUE ESE (ESE Site)"	sequence: "TCGTCG"	CV: "NA"	position: "178"}	228	6	234	0.166667	0	.)))))	0.166667	.)))))	0.166667	0	RESCUE ESE	ESE	0	0
{"name": "ESE_ASFB (ESE Site)"	sequence: "CGTCGGT"	CV: "77.38"	position: "179"}	229	7	236	0.142857	0	)))))))	0	)))))))	0	0	ESE_ASFB	ESE	0	0
{"name": "Sironi_motif2 (ESS Site)"	sequence: "CGTCGGT"	CV: "63.41"	position: "179"}	229	7	236	0	-0.142857	)))))))	0	)))))))	0	0	Sironi_motif2	ESS	0	0
{"name": "ESE_SC35 (ESE Site)"	sequence: "GGTCTCCA"	CV: "84.71"	position: "183"}	233	8	241	0.125	0	)))))..)	0.25	)))))...	0.375	0.125	ESE_SC35	ESE	0.125	0
{"name": "ESE_SC35 (ESE Site)"	sequence: "GTCTCCAG"	CV: "87.9"	position: "184"}	234	8	242	0.125	0	))))..))	0.25	))))....	0.5	0.25	ESE_SC35	ESE	0.25	0
{"name": "ESE_SRp40 (ESE Site)"	sequence: "TCTCCAG"	CV: "79.78"	position: "185"}	235	7	242	0.142857	0	)))..))	0.285714	)))....	0.571429	0.285714	ESE_SRp40	ESE	0.285714	0
{"name": "Sironi_motif3 (ESS Site)"	sequence: "TCTCCAGA"	CV: "74.12"	position: "185"}	235	8	243	0	-0.125	)))..)))	0.25	))).....	0.625	0.375	Sironi_motif3	ESS	0	0.375
{"name": "ESE_ASF (ESE Site)"	sequence: "CTCCAGA"	CV: "73.42"	position: "186"}	236	7	243	0.142857	0	))..)))	0.285714	)).....	0.714286	0.428571	ESE_ASF	ESE	0.428571	0
{"name": "ESE_ASFB (ESE Site)"	sequence: "CTCCAGA"	CV: "76.46"	position: "186"}	236	7	243	0.142857	0	))..)))	0.285714	)).....	0.714286	0.428571	ESE_ASFB	ESE	0.428571	0
{"name": "EIE (ESE Site)"	sequence: "CCAGAT"	CV: "NA"	position: "188"}	238	6	244	0.166667	0	..))))	0.333333	......	1	0.666667	EIE	ESE	0.666667	0
{"name": "Sironi_motif1 (ESS Site)"	sequence: "CCAGATCT"	CV: "71.12"	position: "188"}	238	8	246	0	-0.125	..)))).)	0.375	........	1	0.625	Sironi_motif1	ESS	0	0.625
{"name": "RESCUE ESE (ESE Site)"	sequence: "CAGATC"	CV: "NA"	position: "189"}	239	6	245	0.166667	0	.)))).	0.333333	......	1	0.666667	RESCUE ESE	ESE	0.666667	0
{"name": "EIE (ESE Site)"	sequence: "CAGATC"	CV: "NA"	position: "189"}	239	6	245	0.166667	0	.)))).	0.333333	......	1	0.666667	EIE	ESE	0.666667	0
{"name": "Fas ESS (ESS Site)"	sequence: "TCGTTC"	CV: "NA"	position: "195"}	245	6	251	0	-0.166667	)))...	0.5	.((.((	0.333333	-0.166667	Fas ESS	ESS	0	-0.166667
{"name": "Fas ESS (ESS Site)"	sequence: "CGTTCG"	CV: "NA"	position: "196"}	246	6	252	0	-0.166667	))...)	0.5	((.(((	0.166667	-0.333333	Fas ESS	ESS	0	-0.333333
{"name": "PESE (ESE Site)"	sequence: "CGCGGTCC"	CV: "10.84160448612"	position: "200"}	250	8	258	0.125	0	.)))))..	0.375	(((((.((	0.125	-0.25	PESE	ESE	-0.25	0
{"name": "ESE_ASFB (ESE Site)"	sequence: "CGGTCCA"	CV: "71.46"	position: "202"}	252	7	259	0.142857	0	))))...	0.428571	(((.((.	0.285714	-0.142857	ESE_ASFB	ESE	-0.142857	0
{"name": "ESS_hnRNPA1 (ESS Site)"	sequence: "CAGGTC"	CV: "71.55"	position: "207"}	257	6	263	0	-0.166667	..((..	0.666667	(.((..	0.5	-0.166667	ESS_hnRNPA1	ESS	0	-0.166667
{"name": "ESE_SC35 (ESE Site)"	sequence: "GGTCCCGG"	CV: "81.82"	position: "209"}	259	8	267	0.125	0	((......	0.75	((..(((.	0.375	-0.375	ESE_SC35	ESE	-0.375	0
{"name": "Sironi_motif3 (ESS Site)"	sequence: "GGTCCCGG"	CV: "65.87"	position: "209"}	259	8	267	0	-0.125	((......	0.75	((..(((.	0.375	-0.375	Sironi_motif3	ESS	0	-0.375
{"name": "ESE_ASF (ESE Site)"	sequence: "GTCCCGG"	CV: "74.64"	position: "210"}	260	7	267	0.142857	0	(......	0.857143	(..(((.	0.428571	-0.428571	ESE_ASF	ESE	-0.428571	0
{"name": "ESE_SC35 (ESE Site)"	sequence: "GGTCTCGG"	CV: "77.15"	position: "215"}	265	8	273	0.125	0	........	1	(....)))	0.5	-0.5	ESE_SC35	ESE	-0.5	0
{"name": "ESE_ASFB (ESE Site)"	sequence: "CGGTCCA"	CV: "71.46"	position: "220"}	270	7	277	0.142857	0	....)).	0.714286	))).)).	0.285714	-0.428571	ESE_ASFB	ESE	-0.428571	0
{"name": "PESE (ESE Site)"	sequence: "TCCAGGAG"	CV: "43.95870575987"	position: "223"}	273	8	281	0.125	0	.)).....	0.75	.)).(((.	0.375	-0.375	PESE	ESE	-0.375	0
{"name": "Sironi_motif1 (ESS Site)"	sequence: "CCAGGAGT"	CV: "64.47"	position: "224"}	274	8	282	0	-0.125	))......	0.75	)).(((.(	0.25	-0.5	Sironi_motif1	ESS	0	-0.5
{"name": "ESE_9G8 (ESE Site)"	sequence: "CAGGAG"	CV: "60.54"	position: "225"}	275	6	281	0.166667	0	).....	0.833333	).(((.	0.333333	-0.5	ESE_9G8	ESE	-0.5	0
{"name": "ESS_hnRNPA1 (ESS Site)"	sequence: "CAGGAG"	CV: "73.94"	position: "225"}	275	6	281	0	-0.166667	).....	0.833333	).(((.	0.333333	-0.5	ESS_hnRNPA1	ESS	0	-0.5
{"name": "Sironi_motif1 (ESS Site)"	sequence: "CAGGAGTC"	CV: "63.55"	position: "225"}	275	8	283	0	-0.125	).......	0.875	).(((.((	0.25	-0.625	Sironi_motif1	ESS	0	-0.625
{"name": "PESE (ESE Site)"	sequence: "AGGAGTCC"	CV: "41.70859273576"	position: "226"}	276	8	284	0.125	0	.......(	0.875	.(((.(((	0.25	-0.625	PESE	ESE	-0.625	0
{"name": "ESE_9G8 (ESE Site)"	sequence: "GGAGTC"	CV: "67.52"	position: "227"}	277	6	283	0.166667	0	......	1	(((.((	0.166667	-0.833333	ESE_9G8	ESE	-0.833333	0
{"name": "Sironi_motif3 (ESS Site)"	sequence: "CCTCCCCC"	CV: "84.7"	position: "232"}	282	8	290	0	-0.125	.(((....	0.625	((((....	0.5	-0.125	Sironi_motif3	ESS	0	-0.125
{"name": "ESE_SC35 (ESE Site)"	sequence: "CTCCCCCA"	CV: "76.41"	position: "233"}	283	8	291	0.125	0	(((.....	0.625	(((.....	0.625	0	ESE_SC35	ESE	0	0
{"name": "Sironi_motif3 (ESS Site)"	sequence: "CTCCCCCA"	CV: "60.11"	position: "233"}	283	8	291	0	-0.125	(((.....	0.625	(((.....	0.625	0	Sironi_motif3	ESS	0	0
{"name": "Sironi_motif3 (ESS Site)"	sequence: "TCCCCCAG"	CV: "85.88"	position: "234"}	284	8	292	0	-0.125	((......	0.75	((......	0.75	0	Sironi_motif3	ESS	0	0
{"name": "EIE (ESE Site)"	sequence: "CCCCCA"	CV: "NA"	position: "235"}	285	6	291	0.166667	0	(.....	0.833333	(.....	0.833333	0	EIE	ESE	0	0
{"name": "ESE_ASFB (ESE Site)"	sequence: "CCCCCAG"	CV: "72.23"	position: "235"}	285	7	292	0.142857	0	(......	0.857143	(......	0.857143	0	ESE_ASFB	ESE	0	0
{"name": "EIE (ESE Site)"	sequence: "CCCCAG"	CV: "NA"	position: "236"}	286	6	292	0.166667	0	......	1	......	1	0	EIE	ESE	0	0
{"name": "ESE_ASFB (ESE Site)"	sequence: "CCCCAGT"	CV: "72.77"	position: "236"}	286	7	293	0.142857	0	.......	1	.......	1	0	ESE_ASFB	ESE	0	0
{"name": "ESE_ASFB (ESE Site)"	sequence: "CCCAGTG"	CV: "75.54"	position: "237"}	287	7	294	0.142857	0	.......	1	.......	1	0	ESE_ASFB	ESE	0	0
{"name": "EIE (ESE Site)"	sequence: "CCAGTG"	CV: "NA"	position: "238"}	288	6	294	0.166667	0	......	1	......	1	0	EIE	ESE	0	0
{"name": "Sironi_motif1 (ESS Site)"	sequence: "CCAGTGTC"	CV: "61.34"	position: "238"}	288	8	296	0	-0.125	........	1	........	1	0	Sironi_motif1	ESS	0	0
{"name": "ESS_hnRNPA1 (ESS Site)"	sequence: "CAGTGT"	CV: "68.94"	position: "239"}	289	6	295	0	-0.166667	......	1	......	1	0	ESS_hnRNPA1	ESS	0	0
{"name": "IIE (ESS Site)"	sequence: "CAGTGT"	CV: "NA"	position: "239"}	289	6	295	0	-0.166667	......	1	......	1	0	IIE	ESS	0	0
{"name": "ESE_SRp55 (ESE Site)"	sequence: "AGTGTC"	CV: "74.35"	position: "240"}	290	6	296	0.166667	0	......	1	......	1	0	ESE_SRp55	ESE	0	0
{"name": "IIE (ESS Site)"	sequence: "GTGTCC"	CV: "NA"	position: "241"}	291	6	297	0	-0.166667	......	1	......	1	0	IIE	ESS	0	0
{"name": "Sironi_motif3 (ESS Site)"	sequence: "TGTCCAAG"	CV: "69.69"	position: "242"}	292	8	300	0	-0.125	.......)	0.875	.......)	0.875	0	Sironi_motif3	ESS	0	0
{"name": "EIE (ESE Site)"	sequence: "CCAAGA"	CV: "NA"	position: "245"}	295	6	301	0.166667	0	....))	0.666667	....))	0.666667	0	EIE	ESE	0	0
{"name": "ESE_9G8 (ESE Site)"	sequence: "CAAGAG"	CV: "65.37"	position: "246"}	296	6	302	0.166667	0	...)))	0.5	...)))	0.5	0	ESE_9G8	ESE	0	0
{"name": "EIE (ESE Site)"	sequence: "CAAGAG"	CV: "NA"	position: "246"}	296	6	302	0.166667	0	...)))	0.5	...)))	0.5	0	EIE	ESE	0	0
{"name": "Sironi_motif1 (ESS Site)"	sequence: "CAAGAGGG"	CV: "90.77"	position: "246"}	296	8	304	0	-0.125	...)))..	0.625	...)))))	0.375	-0.25	Sironi_motif1	ESS	0	-0.25
{"name": "ESE_Tra2 (ESE Site)"	sequence: "AAGAG"	CV: "89.41"	position: "247"}	297	5	302	0.2	0	..)))	0.4	..)))	0.4	0	ESE_Tra2	ESE	0	0
{"name": "ESS_hnRNPA1 (ESS Site)"	sequence: "AAGAGG"	CV: "70.84"	position: "247"}	297	6	303	0	-0.166667	..))).	0.5	..))))	0.333333	-0.166667	ESS_hnRNPA1	ESS	0	-0.166667
{"name": "RESCUE ESE (ESE Site)"	sequence: "AAGAGG"	CV: "NA"	position: "247"}	297	6	303	0.166667	0	..))).	0.5	..))))	0.333333	-0.166667	RESCUE ESE	ESE	-0.166667	0
{"name": "EIE (ESE Site)"	sequence: "AAGAGG"	CV: "NA"	position: "247"}	297	6	303	0.166667	0	..))).	0.5	..))))	0.333333	-0.166667	EIE	ESE	-0.166667	0
{"name": "ESE_ASF (ESE Site)"	sequence: "AAGAGGG"	CV: "76.5"	position: "247"}	297	7	304	0.142857	0	..)))..	0.571429	..)))))	0.285714	-0.285714	ESE_ASF	ESE	-0.285714	0
{"name": "Sironi_motif2 (ESS Site)"	sequence: "AGAGGGA"	CV: "79.77"	position: "248"}	298	7	305	0	-0.142857	.)))...	0.571429	.))))).	0.285714	-0.285714	Sironi_motif2	ESS	0	-0.285714
{"name": "ESE_9G8 (ESE Site)"	sequence: "GAGGGA"	CV: "66.92"	position: "249"}	299	6	305	0.166667	0	)))...	0.5	))))).	0.166667	-0.333333	ESE_9G8	ESE	-0.333333	0
{"name": "ESS_hnRNPA1 (ESS Site)"	sequence: "GAGGGA"	CV: "88.93"	position: "249"}	299	6	305	0	-0.166667	)))...	0.5	))))).	0.166667	-0.333333	ESS_hnRNPA1	ESS	0	-0.333333
{"name": "IIE (ESS Site)"	sequence: "GAGGGA"	CV: "NA"	position: "249"}	299	6	305	0	-0.166667	)))...	0.5	))))).	0.166667	-0.333333	IIE	ESS	0	-0.333333
{"name": "EIE (ESE Site)"	sequence: "GGGAAT"	CV: "NA"	position: "251"}	301	6	307	0.166667	0	).....	0.833333	)))..)	0.333333	-0.5	EIE	ESE	-0.5	0
{"name": "IIE (ESS Site)"	sequence: "GGGAAT"	CV: "NA"	position: "251"}	301	6	307	0	-0.166667	).....	0.833333	)))..)	0.333333	-0.5	IIE	ESS	0	-0.5
{"name": "ESE_9G8 (ESE Site)"	sequence: "GAATCC"	CV: "59.87"	position: "253"}	303	6	309	0.166667	0	......	1	)..)))	0.333333	-0.666667	ESE_9G8	ESE	-0.666667	0
{"name": "ESE_SC35 (ESE Site)"	sequence: "GAATCCAA"	CV: "80.71"	position: "253"}	303	8	311	0.125	0	........	1	)..)))..	0.5	-0.5	ESE_SC35	ESE	-0.5	0
{"name": "RESCUE ESE (ESE Site)"	sequence: "AATCCA"	CV: "NA"	position: "254"}	304	6	310	0.166667	0	......	1	..))).	0.5	-0.5	RESCUE ESE	ESE	-0.5	0
{"name": "Sironi_motif3 (ESS Site)"	sequence: "AATCCAAA"	CV: "65.63"	position: "254"}	304	8	312	0	-0.125	........	1	..)))...	0.625	-0.375	Sironi_motif3	ESS	0	-0.375
{"name": "RESCUE ESE (ESE Site)"	sequence: "ATCCAA"	CV: "NA"	position: "255"}	305	6	311	0.166667	0	......	1	.)))..	0.5	-0.5	RESCUE ESE	ESE	-0.5	0
{"name": "RESCUE ESE (ESE Site)"	sequence: "AAATCC"	CV: "NA"	position: "259"}	309	6	315	0.166667	0	......	1	......	1	0	RESCUE ESE	ESE	0	0
{"name": "RESCUE ESE (ESE Site)"	sequence: "AATCCA"	CV: "NA"	position: "260"}	310	6	316	0.166667	0	......	1	......	1	0	RESCUE ESE	ESE	0	0
{"name": "Sironi_motif1 (ESS Site)"	sequence: "ATCCAGGT"	CV: "60.99"	position: "261"}	311	8	319	0	-0.125	........	1	.....)))	0.625	-0.375	Sironi_motif1	ESS	0	-0.375
{"name": "ESS_hnRNPA1 (ESS Site)"	sequence: "CAGGTC"	CV: "71.55"	position: "264"}	314	6	320	0	-0.166667	......	1	..))))	0.333333	-0.666667	ESS_hnRNPA1	ESS	0	-0.666667
{"name": "Sironi_motif2 (ESS Site)"	sequence: "GGTCGCG"	CV: "65.36"	position: "266"}	316	7	323	0	-0.142857	.......	1	)))))))	0	-1	Sironi_motif2	ESS	0	-1
{"name": "ESE_ASFB (ESE Site)"	sequence: "CGATCGA"	CV: "73.54"	position: "271"}	321	7	328	0.142857	0	...((((	0.428571	))).)).	0.285714	-0.142857	ESE_ASFB	ESE	-0.142857	0
{"name": "EIE (ESE Site)"	sequence: "GATCGA"	CV: "NA"	position: "272"}	322	6	328	0.166667	0	..((((	0.333333	)).)).	0.333333	0	EIE	ESE	0	0
{"name": "RESCUE ESE (ESE Site)"	sequence: "CGAAGA"	CV: "NA"	position: "275"}	325	6	331	0.166667	0	((((((	0	))....	0.666667	0.666667	RESCUE ESE	ESE	0.666667	0
{"name": "ESE_9G8 (ESE Site)"	sequence: "GAAGAG"	CV: "84.7"	position: "276"}	326	6	332	0.166667	0	((((((	0	).....	0.833333	0.833333	ESE_9G8	ESE	0.833333	0
{"name": "RESCUE ESE (ESE Site)"	sequence: "GAAGAG"	CV: "NA"	position: "276"}	326	6	332	0.166667	0	((((((	0	).....	0.833333	0.833333	RESCUE ESE	ESE	0.833333	0
{"name": "EIE (ESE Site)"	sequence: "GAAGAG"	CV: "NA"	position: "276"}	326	6	332	0.166667	0	((((((	0	).....	0.833333	0.833333	EIE	ESE	0.833333	0
{"name": "Sironi_motif1 (ESS Site)"	sequence: "GAAGAGTC"	CV: "69.7"	position: "276"}	326	8	334	0	-0.125	((((((.(	0.125	).......	0.875	0.75	Sironi_motif1	ESS	0	0.75
{"name": "ESE_Tra2 (ESE Site)"	sequence: "AAGAG"	CV: "89.41"	position: "277"}	327	5	332	0.2	0	(((((	0	.....	1	1	ESE_Tra2	ESE	1	0
{"name": "ESS_hnRNPA1 (ESS Site)"	sequence: "AAGAGT"	CV: "72.74"	position: "277"}	327	6	333	0	-0.166667	(((((.	0.166667	......	1	0.833333	ESS_hnRNPA1	ESS	0	0.833333
{"name": "Sironi_motif3 (ESS Site)"	sequence: "AGTCCCCC"	CV: "67.53"	position: "280"}	330	8	338	0	-0.125	((.(((((	0.125	........	1	0.875	Sironi_motif3	ESS	0	0.875
{"name": "ESE_SC35 (ESE Site)"	sequence: "GTCCCCCC"	CV: "77.76"	position: "281"}	331	8	339	0.125	0	(.((((((	0.125	.......|	0.875	0.75	ESE_SC35	ESE	0.75	0
{"name": "Sironi_motif3 (ESS Site)"	sequence: "TCCCCCCA"	CV: "78.48"	position: "282"}	332	8	340	0	-0.125	.(((((((	0.125	......||	0.75	0.625	Sironi_motif3	ESS	0	0.625
{"name": "EIE (ESE Site)"	sequence: "CCCCCC"	CV: "NA"	position: "283"}	333	6	339	0.166667	0	((((((	0	.....|	0.833333	0.833333	EIE	ESE	0.833333	0
{"name": "ESE_ASFB (ESE Site)"	sequence: "CCCCCCA"	CV: "76.54"	position: "283"}	333	7	340	0.142857	0	(((((((	0	.....||	0.714286	0.714286	ESE_ASFB	ESE	0.714286	0
{"name": "Sironi_motif3 (ESS Site)"	sequence: "CCCCCCAA"	CV: "83.78"	position: "283"}	333	8	341	0	-0.125	((((((((	0	.....|||	0.625	0.625	Sironi_motif3	ESS	0	0.625
{"name": "EIE (ESE Site)"	sequence: "CCCCCA"	CV: "NA"	position: "284"}	334	6	340	0.166667	0	((((((	0	....||	0.666667	0.666667	EIE	ESE	0.666667	0
{"name": "ESE_ASFB (ESE Site)"	sequence: "CCCCCAA"	CV: "75.54"	position: "284"}	334	7	341	0.142857	0	(((((((	0	....|||	0.571429	0.571429	ESE_ASFB	ESE	0.571429	0
{"name": "Sironi_motif3 (ESS Site)"	sequence: "CCCCCAAG"	CV: "62.88"	position: "284"}	334	8	342	0	-0.125	((((((((	0	....||||	0.5	0.5	Sironi_motif3	ESS	0	0.5
{"name": "EIE (ESE Site)"	sequence: "CCCCAA"	CV: "NA"	position: "285"}	335	6	341	0.166667	0	((((((	0	...|||	0.5	0.5	EIE	ESE	0.5	0
{"name": "ESE_SRp40 (ESE Site)"	sequence: "CCCCAAG"	CV: "79.96"	position: "285"}	335	7	342	0.142857	0	(((((((	0	...||||	0.428571	0.428571	ESE_SRp40	ESE	0.428571	0
{"name": "EIE (ESE Site)"	sequence: "CCCAAG"	CV: "NA"	position: "286"}	336	6	342	0.166667	0	((((((	0	..||||	0.333333	0.333333	EIE	ESE	0.333333	0
{"name": "ESE_ASF (ESE Site)"	sequence: "CCCAAGT"	CV: "73.65"	position: "286"}	336	7	343	0.142857	0	(((((((	0	..|||||	0.285714	0.285714	ESE_ASF	ESE	0.285714	0
{"name": "ESE_ASFB (ESE Site)"	sequence: "CCCAAGT"	CV: "75.92"	position: "286"}	336	7	343	0.142857	0	(((((((	0	..|||||	0.285714	0.285714	ESE_ASFB	ESE	0.285714	0
{"name": "ESE_9G8 (ESE Site)"	sequence: "CAAGTC"	CV: "61.08"	position: "288"}	338	6	344	0.166667	0	((((((	0	||||||	0	0	ESE_9G8	ESE	0	0
{"name": "ESE_SC35 (ESE Site)"	sequence: "GTCTCCTG"	CV: "94.17"	position: "291"}	341	8	349	0.125	0	(((((((.	0.125	||||||||	0	-0.125	ESE_SC35	ESE	-0.125	0
{"name": "Sironi_motif3 (ESS Site)"	sequence: "TCTCCTGA"	CV: "74.12"	position: "292"}	342	8	350	0	-0.125	((((((.(	0.125	||||||||	0	-0.125	Sironi_motif3	ESS	0	-0.125
{"name": "ESE_ASF (ESE Site)"	sequence: "CTCCTGA"	CV: "73.42"	position: "293"}	343	7	350	0.142857	0	(((((.(	0.142857	|||||||	0	-0.142857	ESE_ASF	ESE	-0.142857	0
{"name": "ESE_ASFB (ESE Site)"	sequence: "CTCCTGA"	CV: "77.23"	position: "293"}	343	7	350	0.142857	0	(((((.(	0.142857	|||||||	0	-0.142857	ESE_ASFB	ESE	-0.142857	0
{"name": "EIE (ESE Site)"	sequence: "TCCTGA"	CV: "NA"	position: "294"}	344	6	350	0.166667	0	((((.(	0.166667	||||||	0	-0.166667	EIE	ESE	-0.166667	0
{"name": "PESE (ESE Site)"	sequence: "TCCTGAAG"	CV: "42.05741210042"	position: "294"}	344	8	352	0.125	0	((((.(((	0.125	||||||||	0	-0.125	PESE	ESE	-0.125	0
{"name": "RESCUE ESE (ESE Site)"	sequence: "CCTGAA"	CV: "NA"	position: "295"}	345	6	351	0.166667	0	(((.((	0.166667	||||||	0	-0.166667	RESCUE ESE	ESE	-0.166667	0
{"name": "EIE (ESE Site)"	sequence: "CCTGAA"	CV: "NA"	position: "295"}	345	6	351	0.166667	0	(((.((	0.166667	||||||	0	-0.166667	EIE	ESE	-0.166667	0
{"name": "PESE (ESE Site)"	sequence: "CCTGAAGA"	CV: "64.8679588053"	position: "295"}	345	8	353	0.125	0	(((.((((	0.125	||||||||	0	-0.125	PESE	ESE	-0.125	0
{"name": "RESCUE ESE (ESE Site)"	sequence: "CTGAAG"	CV: "NA"	position: "296"}	346	6	352	0.166667	0	((.(((	0.166667	||||||	0	-0.166667	RESCUE ESE	ESE	-0.166667	0
{"name": "EIE (ESE Site)"	sequence: "CTGAAG"	CV: "NA"	position: "296"}	346	6	352	0.166667	0	((.(((	0.166667	||||||	0	-0.166667	EIE	ESE	-0.166667	0
{"name": "ESE_ASF (ESE Site)"	sequence: "CTGAAGA"	CV: "77.73"	position: "296"}	346	7	353	0.142857	0	((.((((	0.142857	|||||||	0	-0.142857	ESE_ASF	ESE	-0.142857	0
{"name": "ESE_ASFB (ESE Site)"	sequence: "CTGAAGA"	CV: "76.69"	position: "296"}	346	7	353	0.142857	0	((.((((	0.142857	|||||||	0	-0.142857	ESE_ASFB	ESE	-0.142857	0
{"name": "PESE (ESE Site)"	sequence: "CTGAAGAG"	CV: "77.07829563789"	position: "296"}	346	8	354	0.125	0	((.(((((	0.125	||||||||	0	-0.125	PESE	ESE	-0.125	0
{"name": "RESCUE ESE (ESE Site)"	sequence: "TGAAGA"	CV: "NA"	position: "297"}	347	6	353	0.166667	0	(.((((	0.166667	||||||	0	-0.166667	RESCUE ESE	ESE	-0.166667	0
{"name": "EIE (ESE Site)"	sequence: "TGAAGA"	CV: "NA"	position: "297"}	347	6	353	0.166667	0	(.((((	0.166667	||||||	0	-0.166667	EIE	ESE	-0.166667	0
{"name": "Sironi_motif2 (ESS Site)"	sequence: "TGAAGAG"	CV: "65.39"	position: "297"}	347	7	354	0	-0.142857	(.(((((	0.142857	|||||||	0	-0.142857	Sironi_motif2	ESS	0	-0.142857
{"name": "PESE (ESE Site)"	sequence: "TGAAGAGG"	CV: "45.09516837482"	position: "297"}	347	8	355	0.125	0	(.((((((	0.125	||||||||	0	-0.125	PESE	ESE	-0.125	0
{"name": "ESE_9G8 (ESE Site)"	sequence: "GAAGAG"	CV: "84.7"	position: "298"}	348	6	354	0.166667	0	.(((((	0.166667	||||||	0	-0.166667	ESE_9G8	ESE	-0.166667	0
{"name": "RESCUE ESE (ESE Site)"	sequence: "GAAGAG"	CV: "NA"	position: "298"}	348	6	354	0.166667	0	.(((((	0.166667	||||||	0	-0.166667	RESCUE ESE	ESE	-0.166667	0
{"name": "EIE (ESE Site)"	sequence: "GAAGAG"	CV: "NA"	position: "298"}	348	6	354	0.166667	0	.(((((	0.166667	||||||	0	-0.166667	EIE	ESE	-0.166667	0
{"name": "Sironi_motif2 (ESS Site)"	sequence: "GAAGAGG"	CV: "60.55"	position: "298"}	348	7	355	0	-0.142857	.((((((	0.142857	|||||||	0	-0.142857	Sironi_motif2	ESS	0	-0.142857
{"name": "Sironi_motif1 (ESS Site)"	sequence: "GAAGAGGA"	CV: "81.26"	position: "298"}	348	8	356	0	-0.125	.(((((((	0.125	||||||||	0	-0.125	Sironi_motif1	ESS	0	-0.125
{"name": "PESE (ESE Site)"	sequence: "GAAGAGGA"	CV: "70.03347172738"	position: "298"}	348	8	356	0.125	0	.(((((((	0.125	||||||||	0	-0.125	PESE	ESE	-0.125	0
{"name": "ESE_Tra2 (ESE Site)"	sequence: "AAGAG"	CV: "89.41"	position: "299"}	349	5	354	0.2	0	(((((	0	|||||	0	0	ESE_Tra2	ESE	0	0
{"name": "ESS_hnRNPA1 (ESS Site)"	sequence: "AAGAGG"	CV: "70.84"	position: "299"}	349	6	355	0	-0.166667	((((((	0	||||||	0	0	ESS_hnRNPA1	ESS	0	0
{"name": "RESCUE ESE (ESE Site)"	sequence: "AAGAGG"	CV: "NA"	position: "299"}	349	6	355	0.166667	0	((((((	0	||||||	0	0	RESCUE ESE	ESE	0	0
{"name": "EIE (ESE Site)"	sequence: "AAGAGG"	CV: "NA"	position: "299"}	349	6	355	0.166667	0	((((((	0	||||||	0	0	EIE	ESE	0	0
{"name": "ESE_ASF (ESE Site)"	sequence: "AAGAGGA"	CV: "80.75"	position: "299"}	349	7	356	0.142857	0	(((((((	0	|||||||	0	0	ESE_ASF	ESE	0	0
{"name": "PESE (ESE Site)"	sequence: "AAGAGGAA"	CV: "37.18970215555"	position: "299"}	349	8	357	0.125	0	(((((((.	0.125	||||||||	0	-0.125	PESE	ESE	-0.125	0
{"name": "RESCUE ESE (ESE Site)"	sequence: "AGAGGA"	CV: "NA"	position: "300"}	350	6	356	0.166667	0	((((((	0	||||||	0	0	RESCUE ESE	ESE	0	0
{"name": "EIE (ESE Site)"	sequence: "AGAGGA"	CV: "NA"	position: "300"}	350	6	356	0.166667	0	((((((	0	||||||	0	0	EIE	ESE	0	0
{"name": "Sironi_motif2 (ESS Site)"	sequence: "AGAGGAA"	CV: "62.87"	position: "300"}	350	7	357	0	-0.142857	((((((.	0.142857	|||||||	0	-0.142857	Sironi_motif2	ESS	0	-0.142857
{"name": "PESE (ESE Site)"	sequence: "AGAGGAAG"	CV: "34.37757933463"	position: "300"}	350	8	358	0.125	0	((((((..	0.25	||||||||	0	-0.25	PESE	ESE	-0.25	0
{"name": "ESE_9G8 (ESE Site)"	sequence: "GAGGAA"	CV: "82.89"	position: "301"}	351	6	357	0.166667	0	(((((.	0.166667	||||||	0	-0.166667	ESE_9G8	ESE	-0.166667	0
{"name": "ESS_hnRNPA1 (ESS Site)"	sequence: "GAGGAA"	CV: "80.6"	position: "301"}	351	6	357	0	-0.166667	(((((.	0.166667	||||||	0	-0.166667	ESS_hnRNPA1	ESS	0	-0.166667
{"name": "RESCUE ESE (ESE Site)"	sequence: "GAGGAA"	CV: "NA"	position: "301"}	351	6	357	0.166667	0	(((((.	0.166667	||||||	0	-0.166667	RESCUE ESE	ESE	-0.166667	0
{"name": "EIE (ESE Site)"	sequence: "GAGGAA"	CV: "NA"	position: "301"}	351	6	357	0.166667	0	(((((.	0.166667	||||||	0	-0.166667	EIE	ESE	-0.166667	0
{"name": "RESCUE ESE (ESE Site)"	sequence: "AGGAAG"	CV: "NA"	position: "302"}	352	6	358	0.166667	0	((((..	0.333333	||||||	0	-0.333333	RESCUE ESE	ESE	-0.333333	0
{"name": "EIE (ESE Site)"	sequence: "AGGAAG"	CV: "NA"	position: "302"}	352	6	358	0.166667	0	((((..	0.333333	||||||	0	-0.333333	EIE	ESE	-0.333333	0
{"name": "PESE (ESE Site)"	sequence: "AGGAAGGA"	CV: "34.85041414523"	position: "302"}	352	8	360	0.125	0	((((....	0.5	||||||||	0	-0.5	PESE	ESE	-0.5	0
{"name": "Sironi_motif2 (ESS Site)"	sequence: "GGAAGGA"	CV: "68.38"	position: "303"}	353	7	360	0	-0.142857	(((....	0.571429	|||||||	0	-0.571429	Sironi_motif2	ESS	0	-0.571429
{"name": "ESE_9G8 (ESE Site)"	sequence: "GAAGGA"	CV: "71.75"	position: "304"}	354	6	360	0.166667	0	((....	0.666667	||||||	0	-0.666667	ESE_9G8	ESE	-0.666667	0
{"name": "ESS_hnRNPA1 (ESS Site)"	sequence: "GAAGGA"	CV: "71.79"	position: "304"}	354	6	360	0	-0.166667	((....	0.666667	||||||	0	-0.666667	ESS_hnRNPA1	ESS	0	-0.666667
{"name": "RESCUE ESE (ESE Site)"	sequence: "GAAGGA"	CV: "NA"	position: "304"}	354	6	360	0.166667	0	((....	0.666667	||||||	0	-0.666667	RESCUE ESE	ESE	-0.666667	0
{"name": "EIE (ESE Site)"	sequence: "GAAGGA"	CV: "NA"	position: "304"}	354	6	360	0.166667	0	((....	0.666667	||||||	0	-0.666667	EIE	ESE	-0.666667	0
{"name": "Sironi_motif2 (ESS Site)"	sequence: "GAAGGAG"	CV: "60.55"	position: "304"}	354	7	361	0	-0.142857	((.....	0.714286	|||||||	0	-0.714286	Sironi_motif2	ESS	0	-0.714286
{"name": "PESE (ESE Site)"	sequence: "GAAGGAGC"	CV: "72.20643801924"	position: "304"}	354	8	362	0.125	0	((......	0.75	||||||||	0	-0.75	PESE	ESE	-0.75	0
{"name": "ESS_hnRNPA1 (ESS Site)"	sequence: "AAGGAG"	CV: "73.94"	position: "305"}	355	6	361	0	-0.166667	(.....	0.833333	||||||	0	-0.833333	ESS_hnRNPA1	ESS	0	-0.833333
{"name": "RESCUE ESE (ESE Site)"	sequence: "AAGGAG"	CV: "NA"	position: "305"}	355	6	361	0.166667	0	(.....	0.833333	||||||	0	-0.833333	RESCUE ESE	ESE	-0.833333	0
{"name": "EIE (ESE Site)"	sequence: "AAGGAG"	CV: "NA"	position: "305"}	355	6	361	0.166667	0	(.....	0.833333	||||||	0	-0.833333	EIE	ESE	-0.833333	0
{"name": "EIE (ESE Site)"	sequence: "AGGAGC"	CV: "NA"	position: "306"}	356	6	362	0.166667	0	......	1	||||||	0	-1	EIE	ESE	-1	0
{"name": "EIE (ESE Site)"	sequence: "GGAGCG"	CV: "NA"	position: "307"}	357	6	363	0.166667	0	......	1	||||||	0	-1	EIE	ESE	-1	0
{"name": "Sironi_motif2 (ESS Site)"	sequence: "GGAGCGG"	CV: "77.46"	position: "307"}	357	7	364	0	-0.142857	.......	1	||||||.	0.142857	-0.857143	Sironi_motif2	ESS	0	-0.857143
{"name": "Sironi_motif1 (ESS Site)"	sequence: "GGAGCGGT"	CV: "72.34"	position: "307"}	357	8	365	0	-0.125	........	1	||||||..	0.25	-0.75	Sironi_motif1	ESS	0	-0.75
{"name": "ESS_hnRNPA1 (ESS Site)"	sequence: "GAGCGG"	CV: "70.84"	position: "308"}	358	6	364	0	-0.166667	......	1	|||||.	0.166667	-0.833333	ESS_hnRNPA1	ESS	0	-0.833333
{"name": "EIE (ESE Site)"	sequence: "GAGCGG"	CV: "NA"	position: "308"}	358	6	364	0.166667	0	......	1	|||||.	0.166667	-0.833333	EIE	ESE	-0.833333	0
{"name": "ESE_ASF (ESE Site)"	sequence: "GAGCGGT"	CV: "78.37"	position: "308"}	358	7	365	0.142857	0	.......	1	|||||..	0.285714	-0.714286	ESE_ASF	ESE	-0.714286	0
{"name": "Sironi_motif2 (ESS Site)"	sequence: "AGCGGTG"	CV: "64.21"	position: "309"}	359	7	366	0	-0.142857	.......	1	||||...	0.428571	-0.571429	Sironi_motif2	ESS	0	-0.571429
{"name": "ESE_9G8 (ESE Site)"	sequence: "GGTGTC"	CV: "63.29"	position: "312"}	362	6	368	0.166667	0	....))	0.666667	|.....	0.833333	0.166667	ESE_9G8	ESE	0.166667	0
{"name": "IIE (ESS Site)"	sequence: "GGTGTC"	CV: "NA"	position: "312"}	362	6	368	0	-0.166667	....))	0.666667	|.....	0.833333	0.166667	IIE	ESS	0	0.166667
{"name": "IIE (ESS Site)"	sequence: "GTGTCC"	CV: "NA"	position: "313"}	363	6	369	0	-0.166667	...)))	0.5	......	1	0.5	IIE	ESS	0	0.5
{"name": "IIE (ESS Site)"	sequence: "TGTCCT"	CV: "NA"	position: "314"}	364	6	370	0	-0.166667	..))))	0.333333	......	1	0.666667	IIE	ESS	0	0.666667
{"name": "ESE_SC35 (ESE Site)"	sequence: "GTCCTCTT"	CV: "77.03"	position: "315"}	365	8	373	0.125	0	.)))))))	0.125	........	1	0.875	ESE_SC35	ESE	0.875	0
{"name": "IIE (ESS Site)"	sequence: "CCTCTT"	CV: "NA"	position: "317"}	367	6	373	0	-0.166667	))))))	0	......	1	1	IIE	ESS	0	1
{"name": "Sironi_motif3 (ESS Site)"	sequence: "CCTCTTAA"	CV: "64.74"	position: "317"}	367	8	375	0	-0.125	)))))).)	0.125	........	1	0.875	Sironi_motif3	ESS	0	0.875
{"name": "ESE_9G8 (ESE Site)"	sequence: "TAAGAA"	CV: "65.98"	position: "322"}	372	6	378	0.166667	0	).))..	0.5	......	1	0.5	ESE_9G8	ESE	0.5	0
{"name": "ESS_hnRNPA1 (ESS Site)"	sequence: "TAAGAA"	CV: "74.89"	position: "322"}	372	6	378	0	-0.166667	).))..	0.5	......	1	0.5	ESS_hnRNPA1	ESS	0	0.5
{"name": "EIE (ESE Site)"	sequence: "TAAGAA"	CV: "NA"	position: "322"}	372	6	378	0.166667	0	).))..	0.5	......	1	0.5	EIE	ESE	0.5	0
{"name": "ESE_Tra2 (ESE Site)"	sequence: "AAGAA"	CV: "100.34"	position: "323"}	373	5	378	0.2	0	.))..	0.6	.....	1	0.4	ESE_Tra2	ESE	0.4	0
{"name": "ESS_hnRNPA1 (ESS Site)"	sequence: "AAGAAA"	CV: "65.36"	position: "323"}	373	6	379	0	-0.166667	.))...	0.666667	......	1	0.333333	ESS_hnRNPA1	ESS	0	0.333333
{"name": "RESCUE ESE (ESE Site)"	sequence: "AAGAAA"	CV: "NA"	position: "323"}	373	6	379	0.166667	0	.))...	0.666667	......	1	0.333333	RESCUE ESE	ESE	0.333333	0
{"name": "EIE (ESE Site)"	sequence: "AAGAAA"	CV: "NA"	position: "323"}	373	6	379	0.166667	0	.))...	0.666667	......	1	0.333333	EIE	ESE	0.333333	0
{"name": "RESCUE ESE (ESE Site)"	sequence: "AGAAAA"	CV: "NA"	position: "324"}	374	6	380	0.166667	0	))....	0.666667	......	1	0.333333	RESCUE ESE	ESE	0.333333	0
{"name": "EIE (ESE Site)"	sequence: "AGAAAA"	CV: "NA"	position: "324"}	374	6	380	0.166667	0	))....	0.666667	......	1	0.333333	EIE	ESE	0.333333	0
{"name": "ESE_9G8 (ESE Site)"	sequence: "GAAAAT"	CV: "66.18"	position: "325"}	375	6	381	0.166667	0	).....	0.833333	......	1	0.166667	ESE_9G8	ESE	0.166667	0
{"name": "RESCUE ESE (ESE Site)"	sequence: "GAAAAT"	CV: "NA"	position: "325"}	375	6	381	0.166667	0	).....	0.833333	......	1	0.166667	RESCUE ESE	ESE	0.166667	0
{"name": "EIE (ESE Site)"	sequence: "GAAAAT"	CV: "NA"	position: "325"}	375	6	381	0.166667	0	).....	0.833333	......	1	0.166667	EIE	ESE	0.166667	0
{"name": "ESE_Tra2 (ESE Site)"	sequence: "AAAAT"	CV: "81.36"	position: "326"}	376	5	381	0.2	0	.....	1	.....	1	0	ESE_Tra2	ESE	0	0
{"name": "EIE (ESE Site)"	sequence: "AAAATG"	CV: "NA"	position: "326"}	376	6	382	0.166667	0	.....(	0.833333	......	1	0.166667	EIE	ESE	0.166667	0
{"name": "PESS (ESS Site)"	sequence: "AAAATGGT"	CV: "-32.15318188794"	position: "326"}	376	8	384	0	-0.125	.....(((	0.625	........	1	0.375	PESS	ESS	0	0.375
{"name": "EIE (ESE Site)"	sequence: "AAATGG"	CV: "NA"	position: "327"}	377	6	383	0.166667	0	....((	0.666667	......	1	0.333333	EIE	ESE	0.333333	0
{"name": "PESS (ESS Site)"	sequence: "AAATGGTA"	CV: "-29.37921766577"	position: "327"}	377	8	385	0	-0.125	....(((.	0.625	........	1	0.375	PESS	ESS	0	0.375
{"name": "IIE (ESS Site)"	sequence: "GTAATG"	CV: "NA"	position: "332"}	382	6	388	0	-0.166667	((..((	0.333333	......	1	0.666667	IIE	ESS	0	0.666667
{"name": "ESS_hnRNPA1 (ESS Site)"	sequence: "TAATGT"	CV: "67.03"	position: "333"}	383	6	389	0	-0.166667	(..(((	0.333333	......	1	0.666667	ESS_hnRNPA1	ESS	0	0.666667
{"name": "IIE (ESS Site)"	sequence: "TAATGT"	CV: "NA"	position: "333"}	383	6	389	0	-0.166667	(..(((	0.333333	......	1	0.666667	IIE	ESS	0	0.666667
{"name": "PESS (ESS Site)"	sequence: "TAATGTCT"	CV: "-32.21747083148"	position: "333"}	383	8	391	0	-0.125	(..(((((	0.25	........	1	0.75	PESS	ESS	0	0.75
{"name": "IIE (ESS Site)"	sequence: "ATGTCT"	CV: "NA"	position: "335"}	385	6	391	0	-0.166667	.(((((	0.166667	......	1	0.833333	IIE	ESS	0	0.833333
{"name": "IIE (ESS Site)"	sequence: "TGTCTG"	CV: "NA"	position: "336"}	386	6	392	0	-0.166667	(((((.	0.166667	.....)	0.833333	0.666667	IIE	ESS	0	0.666667
{"name": "ESE_SRp40 (ESE Site)"	sequence: "TGTCTGG"	CV: "87.21"	position: "336"}	386	7	393	0.142857	0	(((((.(	0.142857	.....))	0.714286	0.571429	ESE_SRp40	ESE	0.571429	0
{"name": "Sironi_motif2 (ESS Site)"	sequence: "TGTCTGG"	CV: "68.44"	position: "336"}	386	7	393	0	-0.142857	(((((.(	0.142857	.....))	0.714286	0.571429	Sironi_motif2	ESS	0	0.571429
{"name": "IIE (ESS Site)"	sequence: "GTCTGG"	CV: "NA"	position: "337"}	387	6	393	0	-0.166667	((((.(	0.166667	....))	0.666667	0.5	IIE	ESS	0	0.5
{"name": "Sironi_motif2 (ESS Site)"	sequence: "GTCTGGG"	CV: "60.01"	position: "337"}	387	7	394	0	-0.142857	((((.((	0.142857	....)))	0.571429	0.428571	Sironi_motif2	ESS	0	0.428571
{"name": "IIE (ESS Site)"	sequence: "TCTGGG"	CV: "NA"	position: "338"}	388	6	394	0	-0.166667	(((.((	0.166667	...)))	0.5	0.333333	IIE	ESS	0	0.333333
{"name": "Sironi_motif2 (ESS Site)"	sequence: "TCTGGGA"	CV: "72.75"	position: "338"}	388	7	395	0	-0.142857	(((.((.	0.285714	...))))	0.428571	0.142857	Sironi_motif2	ESS	0	0.142857
{"name": "IIE (ESS Site)"	sequence: "CTGGGA"	CV: "NA"	position: "339"}	389	6	395	0	-0.166667	((.((.	0.333333	..))))	0.333333	0	IIE	ESS	0	0
{"name": "EIE (ESE Site)"	sequence: "TGGGAA"	CV: "NA"	position: "340"}	390	6	396	0.166667	0	(.((..	0.5	.)))).	0.333333	-0.166667	EIE	ESE	-0.166667	0
{"name": "IIE (ESS Site)"	sequence: "TGGGAA"	CV: "NA"	position: "340"}	390	6	396	0	-0.166667	(.((..	0.5	.)))).	0.333333	-0.166667	IIE	ESS	0	-0.166667
{"name": "EIE (ESE Site)"	sequence: "GGGAAT"	CV: "NA"	position: "341"}	391	6	397	0.166667	0	.((...	0.666667	))))..	0.333333	-0.333333	EIE	ESE	-0.333333	0
{"name": "IIE (ESS Site)"	sequence: "GGGAAT"	CV: "NA"	position: "341"}	391	6	397	0	-0.166667	.((...	0.666667	))))..	0.333333	-0.333333	IIE	ESS	0	-0.333333
{"name": "ESE_9G8 (ESE Site)"	sequence: "GAATCC"	CV: "59.87"	position: "343"}	393	6	399	0.166667	0	(...))	0.5	))..))	0.333333	-0.166667	ESE_9G8	ESE	-0.166667	0

## Sheet: SRSF2 e2 - Analysis
Char	Str 1	Str 2	Mask	Comp	Concat	ESE	ESS	ESE+ESS	S1, ESE	S1, ESS	S1, ESE + ESS	S2,ESE	S2, ESS	S2,ESE + ESS	∆ESE	∆ESS	∆ESE+ESS
1	.	.	.	.	.	0	0	0	0	0	0	0	0	0	0	0	0
2	.	.	.	.	..	0	0	0	0	0	0	0	0	0	0	0	0
3	.	.	.	.	...	0	0	0	0	0	0	0	0	0	0	0	0
4	.	.	.	.	....	0	0	0	0	0	0	0	0	0	0	0	0
5	.	.	.	.	.....	0	0	0	0	0	0	0	0	0	0	0	0
6	.	.	.	.	......	0	0	0	0	0	0	0	0	0	0	0	0
7	.	.	.	.	.......	0	0	0	0	0	0	0	0	0	0	0	0
8	(	(	.	(	.......(	0	0	0	0	0	0	0	0	0	0	0	0
9	(	(	.	(	.......((	0	0	0	0	0	0	0	0	0	0	0	0
10	(	(	.	(	.......(((	0	0	0	0	0	0	0	0	0	0	0	0
11	(	(	.	(	.......((((	0	0	0	0	0	0	0	0	0	0	0	0
12	(	(	.	(	.......(((((	0	0	0	0	0	0	0	0	0	0	0	0
13	(	(	.	(	.......((((((	0	0	0	0	0	0	0	0	0	0	0	0
14	(	(	.	(	.......(((((((	0	0	0	0	0	0	0	0	0	0	0	0
15	(	(	.	(	.......((((((((	0	0	0	0	0	0	0	0	0	0	0	0
16	(	(	.	(	.......(((((((((	0	0	0	0	0	0	0	0	0	0	0	0
17	(	(	.	(	.......((((((((((	0	0	0	0	0	0	0	0	0	0	0	0
18	(	(	.	(	.......(((((((((((	0	0	0	0	0	0	0	0	0	0	0	0
19	.	.	.	.	.......(((((((((((.	0	0	0	0	0	0	0	0	0	0	0	0
20	(	(	.	(	.......(((((((((((.(	0	0	0	0	0	0	0	0	0	0	0	0
21	(	(	.	(	.......(((((((((((.((	0	0	0	0	0	0	0	0	0	0	0	0
22	(	(	.	(	.......(((((((((((.(((	0	0	0	0	0	0	0	0	0	0	0	0
23	.	.	.	.	.......(((((((((((.(((.	0	0	0	0	0	0	0	0	0	0	0	0
24	.	.	.	.	.......(((((((((((.(((..	0	0	0	0	0	0	0	0	0	0	0	0
25	(	(	.	(	.......(((((((((((.(((..(	0	0	0	0	0	0	0	0	0	0	0	0
26	(	(	.	(	.......(((((((((((.(((..((	0	0	0	0	0	0	0	0	0	0	0	0
27	(	(	.	(	.......(((((((((((.(((..(((	0	0	0	0	0	0	0	0	0	0	0	0
28	.	.	.	.	.......(((((((((((.(((..(((.	0	0	0	0	0	0	0	0	0	0	0	0
29	(	(	.	(	.......(((((((((((.(((..(((.(	0	0	0	0	0	0	0	0	0	0	0	0
30	(	(	.	(	.......(((((((((((.(((..(((.((	0	0	0	0	0	0	0	0	0	0	0	0
31	.	.	.	.	.......(((((((((((.(((..(((.((.	0	0	0	0	0	0	0	0	0	0	0	0
32	.	.	.	.	.......(((((((((((.(((..(((.((..	0	0	0	0	0	0	0	0	0	0	0	0
33	(	.	.	.	.......(((((((((((.(((..(((.((...	0	0	0	0	0	0	0	0	0	0	0	0
34	(	.	.	.	.......(((((((((((.(((..(((.((....	0	0	0	0	0	0	0	0	0	0	0	0
35	.	.	.	.	.......(((((((((((.(((..(((.((.....	0	0	0	0	0	0	0	0	0	0	0	0
36	.	.	.	.	.......(((((((((((.(((..(((.((......	0	0	0	0	0	0	0	0	0	0	0	0
37	.	.	.	.	.......(((((((((((.(((..(((.((.......	0	0	0	0	0	0	0	0	0	0	0	0
38	.	.	.	.	.......(((((((((((.(((..(((.((........	0	0	0	0	0	0	0	0	0	0	0	0
39	.	.	.	.	.......(((((((((((.(((..(((.((.........	0	0	0	0	0	0	0	0	0	0	0	0
40	.	.	.	.	.......(((((((((((.(((..(((.((..........	0	0	0	0	0	0	0	0	0	0	0	0
41	)	.	.	.	.......(((((((((((.(((..(((.((...........	0	0	0	0	0	0	0	0	0	0	0	0
42	)	.	.	.	.......(((((((((((.(((..(((.((............	0	0	0	0	0	0	0	0	0	0	0	0
43	.	.	.	.	.......(((((((((((.(((..(((.((.............	0	0	0	0	0	0	0	0	0	0	0	0
44	.	.	.	.	.......(((((((((((.(((..(((.((..............	0	0	0	0	0	0	0	0	0	0	0	0
45	)	)	.	)	.......(((((((((((.(((..(((.((..............)	0	0	0	0	0	0	0	0	0	0	0	0
46	)	)	.	)	.......(((((((((((.(((..(((.((..............))	0	0	0	0	0	0	0	0	0	0	0	0
47	.	.	.	.	.......(((((((((((.(((..(((.((..............)).	0	0	0	0	0	0	0	0	0	0	0	0
48	)	)	.	)	.......(((((((((((.(((..(((.((..............)).)	0	0	0	0	0	0	0	0	0	0	0	0
49	)	)	.	)	.......(((((((((((.(((..(((.((..............)).))	0	0	0	0	0	0	0	0	0	0	0	0
50	)	)	.	)	.......(((((((((((.(((..(((.((..............)).)))	0	0	0	0	0	0	0	0	0	0	0	0
51	.	.	.	.	.......(((((((((((.(((..(((.((..............)).))).	0	-0.166667	-0.166667	0	-0.166667	-0.166667	0	-0.166667	-0.166667	0	0	0
52	.	.	.	.	.......(((((((((((.(((..(((.((..............)).)))..	0.142857	-0.333333	-0.190476	0.142857	-0.333333	-0.190476	0.142857	-0.333333	-0.190476	0	0	0
53	.	.	.	.	.......(((((((((((.(((..(((.((..............)).)))...	0.142857	-0.333333	-0.190476	0.142857	-0.333333	-0.190476	0.142857	-0.333333	-0.190476	0	0	0
54	)	)	.	)	.......(((((((((((.(((..(((.((..............)).)))...)	0.142857	-0.333333	-0.190476	0	0	0	0	0	0	0	0	0
55	)	)	.	)	.......(((((((((((.(((..(((.((..............)).)))...))	0.309524	-0.333333	-0.0238095	0	0	0	0	0	0	0	0	0
56	)	)	.	)	.......(((((((((((.(((..(((.((..............)).)))...)))	0.309524	-0.333333	-0.0238095	0	0	0	0	0	0	0	0	0
57	.	.	.	.	.......(((((((((((.(((..(((.((..............)).)))...))).	0.309524	-0.291667	0.0178571	0.309524	-0.291667	0.0178571	0.309524	-0.291667	0.0178571	0	0	0
58	)	)	.	)	.......(((((((((((.(((..(((.((..............)).)))...))).)	0.309524	-0.125	0.184524	0	0	0	0	0	0	0	0	0
59	)	)	.	)	.......(((((((((((.(((..(((.((..............)).)))...))).))	0.166667	-0.125	0.0416667	0	0	0	0	0	0	0	0	0
60	)	)	.	)	.......(((((((((((.(((..(((.((..............)).)))...))).)))	0.458333	-0.125	0.333333	0	0	0	0	0	0	0	0	0
61	)	)	.	)	.......(((((((((((.(((..(((.((..............)).)))...))).))))	0.583333	-0.25	0.333333	0	0	0	0	0	0	0	0	0
62	)	)	.	)	.......(((((((((((.(((..(((.((..............)).)))...))).)))))	0.869048	-0.375	0.494048	0	0	0	0	0	0	0	0	0
63	)	)	.	)	.......(((((((((((.(((..(((.((..............)).)))...))).))))))	1.11905	-0.5	0.619048	0	0	0	0	0	0	0	0	0
64	)	)	.	)	.......(((((((((((.(((..(((.((..............)).)))...))).)))))))	1.11905	-0.5	0.619048	0	0	0	0	0	0	0	0	0
65	)	)	.	)	.......(((((((((((.(((..(((.((..............)).)))...))).))))))))	1.11905	-0.375	0.744048	0	0	0	0	0	0	0	0	0
66	)	)	.	)	.......(((((((((((.(((..(((.((..............)).)))...))).)))))))))	1.2619	-0.375	0.886905	0	0	0	0	0	0	0	0	0
67	)	)	.	)	.......(((((((((((.(((..(((.((..............)).)))...))).))))))))))	1.2619	-0.375	0.886905	0	0	0	0	0	0	0	0	0
68	)	)	.	)	.......(((((((((((.(((..(((.((..............)).)))...))).)))))))))))	1.58929	-0.5	1.08929	0	0	0	0	0	0	0	0	0
69	.	.	.	.	.......(((((((((((.(((..(((.((..............)).)))...))).))))))))))).	1.34524	-0.375	0.970238	1.34524	-0.375	0.970238	1.34524	-0.375	0.970238	0	0	0
70	.	.	.	.	.......(((((((((((.(((..(((.((..............)).)))...))).)))))))))))..	1.5119	-0.25	1.2619	1.5119	-0.25	1.2619	1.5119	-0.25	1.2619	0	0	0
71	.	.	.	.	.......(((((((((((.(((..(((.((..............)).)))...))).)))))))))))...	1.42857	-0.125	1.30357	1.42857	-0.125	1.30357	1.42857	-0.125	1.30357	0	0	0
72	.	.	.	.	.......(((((((((((.(((..(((.((..............)).)))...))).)))))))))))....	1.2619	-0.125	1.1369	1.2619	-0.125	1.1369	1.2619	-0.125	1.1369	0	0	0
73	.	.	.	.	.......(((((((((((.(((..(((.((..............)).)))...))).))))))))))).....	0.952381	-0.125	0.827381	0.952381	-0.125	0.827381	0.952381	-0.125	0.827381	0	0	0
74	.	.	.	.	.......(((((((((((.(((..(((.((..............)).)))...))).)))))))))))......	0.785714	-0.291667	0.494048	0.785714	-0.291667	0.494048	0.785714	-0.291667	0.494048	0	0	0
75	.	.	.	.	.......(((((((((((.(((..(((.((..............)).)))...))).))))))))))).......	0.458333	-0.291667	0.166667	0.458333	-0.291667	0.166667	0.458333	-0.291667	0.166667	0	0	0
76	.	.	.	.	.......(((((((((((.(((..(((.((..............)).)))...))).)))))))))))........	0.458333	-0.434524	0.0238095	0.458333	-0.434524	0.0238095	0.458333	-0.434524	0.0238095	0	0	0
77	.	.	.	.	.......(((((((((((.(((..(((.((..............)).)))...))).))))))))))).........	0.416667	-0.434524	-0.0178571	0.416667	-0.434524	-0.0178571	0.416667	-0.434524	-0.0178571	0	0	0
78	.	.	.	.	.......(((((((((((.(((..(((.((..............)).)))...))).)))))))))))..........	0.416667	-0.434524	-0.0178571	0.416667	-0.434524	-0.0178571	0.416667	-0.434524	-0.0178571	0	0	0
79	.	.	.	.	.......(((((((((((.(((..(((.((..............)).)))...))).)))))))))))...........	0.75	-0.434524	0.315476	0.75	-0.434524	0.315476	0.75	-0.434524	0.315476	0	0	0
80	.	.	.	.	.......(((((((((((.(((..(((.((..............)).)))...))).)))))))))))............	0.75	-0.267857	0.482143	0.75	-0.267857	0.482143	0.75	-0.267857	0.482143	0	0	0
81	.	.	.	.	.......(((((((((((.(((..(((.((..............)).)))...))).))))))))))).............	1.04167	-0.267857	0.77381	1.04167	-0.267857	0.77381	1.04167	-0.267857	0.77381	0	0	0
82	.	.	.	.	.......(((((((((((.(((..(((.((..............)).)))...))).)))))))))))..............	1.16667	-0.267857	0.89881	1.16667	-0.267857	0.89881	1.16667	-0.267857	0.89881	0	0	0
83	.	.	.	.	.......(((((((((((.(((..(((.((..............)).)))...))).)))))))))))...............	1.04167	-0.25	0.791667	1.04167	-0.25	0.791667	1.04167	-0.25	0.791667	0	0	0
84	.	.	.	.	.......(((((((((((.(((..(((.((..............)).)))...))).)))))))))))................	1.45238	-0.125	1.32738	1.45238	-0.125	1.32738	1.45238	-0.125	1.32738	0	0	0
85	.	.	.	.	.......(((((((((((.(((..(((.((..............)).)))...))).))))))))))).................	1.11905	-0.125	0.994048	1.11905	-0.125	0.994048	1.11905	-0.125	0.994048	0	0	0
86	.	.	.	.	.......(((((((((((.(((..(((.((..............)).)))...))).)))))))))))..................	1.11905	-0.125	0.994048	1.11905	-0.125	0.994048	1.11905	-0.125	0.994048	0	0	0
87	.	.	.	.	.......(((((((((((.(((..(((.((..............)).)))...))).)))))))))))...................	1.2619	-0.25	1.0119	1.2619	-0.25	1.0119	1.2619	-0.25	1.0119	0	0	0
88	.	.	.	.	.......(((((((((((.(((..(((.((..............)).)))...))).)))))))))))....................	1.2619	-0.25	1.0119	1.2619	-0.25	1.0119	1.2619	-0.25	1.0119	0	0	0
89	.	.	.	.	.......(((((((((((.(((..(((.((..............)).)))...))).))))))))))).....................	1.42262	-0.25	1.17262	1.42262	-0.25	1.17262	1.42262	-0.25	1.17262	0	0	0
90	.	.	.	.	.......(((((((((((.(((..(((.((..............)).)))...))).)))))))))))......................	1.29762	-0.25	1.04762	1.29762	-0.25	1.04762	1.29762	-0.25	1.04762	0	0	0
91	.	.	.	.	.......(((((((((((.(((..(((.((..............)).)))...))).))))))))))).......................	1.17857	-0.125	1.05357	1.17857	-0.125	1.05357	1.17857	-0.125	1.05357	0	0	0
92	.	.	.	.	.......(((((((((((.(((..(((.((..............)).)))...))).)))))))))))........................	1.05357	-0.125	0.928571	1.05357	-0.125	0.928571	1.05357	-0.125	0.928571	0	0	0
93	.	.	.	.	.......(((((((((((.(((..(((.((..............)).)))...))).))))))))))).........................	0.886905	-0.125	0.761905	0.886905	-0.125	0.761905	0.886905	-0.125	0.761905	0	0	0
94	(	(	.	(	.......(((((((((((.(((..(((.((..............)).)))...))).))))))))))).........................(	0.702381	-0.25	0.452381	0	0	0	0	0	0	0	0	0
95	(	(	.	(	.......(((((((((((.(((..(((.((..............)).)))...))).))))))))))).........................((	0.702381	-0.125	0.577381	0	0	0	0	0	0	0	0	0
96	(	(	.	(	.......(((((((((((.(((..(((.((..............)).)))...))).))))))))))).........................(((	0.416667	-0.125	0.291667	0	0	0	0	0	0	0	0	0
97	.	.	.	.	.......(((((((((((.(((..(((.((..............)).)))...))).))))))))))).........................(((.	0.25	-0.125	0.125	0.25	-0.125	0.125	0.25	-0.125	0.125	0	0	0
98	(	(	.	(	.......(((((((((((.(((..(((.((..............)).)))...))).))))))))))).........................(((.(	0.25	-0.25	0	0	0	0	0	0	0	0	0	0
99	(	(	.	(	.......(((((((((((.(((..(((.((..............)).)))...))).))))))))))).........................(((.((	0.392857	-0.25	0.142857	0	0	0	0	0	0	0	0	0
100	(	(	.	(	.......(((((((((((.(((..(((.((..............)).)))...))).))))))))))).........................(((.(((	0.559524	-0.392857	0.166667	0	0	0	0	0	0	0	0	0
101	.	.	.	.	.......(((((((((((.(((..(((.((..............)).)))...))).))))))))))).........................(((.(((.	0.434524	-0.392857	0.0416667	0.434524	-0.392857	0.0416667	0.434524	-0.392857	0.0416667	0	0	0
102	.	.	.	.	.......(((((((((((.(((..(((.((..............)).)))...))).))))))))))).........................(((.(((..	0.309524	-0.410714	-0.10119	0.309524	-0.410714	-0.10119	0.309524	-0.410714	-0.10119	0	0	0
103	.	.	.	.	.......(((((((((((.(((..(((.((..............)).)))...))).))))))))))).........................(((.(((...	0.309524	-0.410714	-0.10119	0.309524	-0.410714	-0.10119	0.309524	-0.410714	-0.10119	0	0	0
104	.	.	.	.	.......(((((((((((.(((..(((.((..............)).)))...))).))))))))))).........................(((.(((....	0.309524	-0.410714	-0.10119	0.309524	-0.410714	-0.10119	0.309524	-0.410714	-0.10119	0	0	0
105	)	)	.	)	.......(((((((((((.(((..(((.((..............)).)))...))).))))))))))).........................(((.(((....)	0.452381	-0.410714	0.0416667	0	0	0	0	0	0	0	0	0
106	)	)	.	)	.......(((((((((((.(((..(((.((..............)).)))...))).))))))))))).........................(((.(((....))	0.309524	-0.428571	-0.119048	0	0	0	0	0	0	0	0	0
107	)	)	.	)	.......(((((((((((.(((..(((.((..............)).)))...))).))))))))))).........................(((.(((....)))	0.452381	-0.285714	0.166667	0	0	0	0	0	0	0	0	0
108	.	.	.	.	.......(((((((((((.(((..(((.((..............)).)))...))).))))))))))).........................(((.(((....))).	0.452381	-0.452381	1.33227e-15	0.452381	-0.452381	1.33227e-15	0.452381	-0.452381	1.33227e-15	0	0	0
109	)	)	.	)	.......(((((((((((.(((..(((.((..............)).)))...))).))))))))))).........................(((.(((....))).)	0.452381	-0.47619	-0.0238095	0	0	0	0	0	0	0	0	0
110	)	)	.	)	.......(((((((((((.(((..(((.((..............)).)))...))).))))))))))).........................(((.(((....))).))	0.452381	-0.642857	-0.190476	0	0	0	0	0	0	0	0	0
111	)	)	.	)	.......(((((((((((.(((..(((.((..............)).)))...))).))))))))))).........................(((.(((....))).)))	0.577381	-0.934524	-0.357143	0	0	0	0	0	0	0	0	0
112	.	.	.	.	.......(((((((((((.(((..(((.((..............)).)))...))).))))))))))).........................(((.(((....))).))).	0.267857	-0.934524	-0.666667	0.267857	-0.934524	-0.666667	0.267857	-0.934524	-0.666667	0	0	0
113	.	.	.	.	.......(((((((((((.(((..(((.((..............)).)))...))).))))))))))).........................(((.(((....))).)))..	0.410714	-0.791667	-0.380952	0.410714	-0.791667	-0.380952	0.410714	-0.791667	-0.380952	0	0	0
114	.	.	.	.	.......(((((((((((.(((..(((.((..............)).)))...))).))))))))))).........................(((.(((....))).)))...	0.267857	-0.625	-0.357143	0.267857	-0.625	-0.357143	0.267857	-0.625	-0.357143	0	0	0
115	.	.	.	.	.......(((((((((((.(((..(((.((..............)).)))...))).))))))))))).........................(((.(((....))).)))....	0.267857	-0.458333	-0.190476	0.267857	-0.458333	-0.190476	0.267857	-0.458333	-0.190476	0	0	0
116	.	.	.	.	.......(((((((((((.(((..(((.((..............)).)))...))).))))))))))).........................(((.(((....))).))).....	0.267857	-0.458333	-0.190476	0.267857	-0.458333	-0.190476	0.267857	-0.458333	-0.190476	0	0	0
117	.	.	.	.	.......(((((((((((.(((..(((.((..............)).)))...))).))))))))))).........................(((.(((....))).)))......	0.267857	-0.291667	-0.0238095	0.267857	-0.291667	-0.0238095	0.267857	-0.291667	-0.0238095	0	0	0
118	.	.	.	.	.......(((((((((((.(((..(((.((..............)).)))...))).))))))))))).........................(((.(((....))).))).......	0.267857	-0.291667	-0.0238095	0.267857	-0.291667	-0.0238095	0.267857	-0.291667	-0.0238095	0	0	0
119	.	.	.	.	.......(((((((((((.(((..(((.((..............)).)))...))).))))))))))).........................(((.(((....))).)))........	0.267857	-0.166667	0.10119	0.267857	-0.166667	0.10119	0.267857	-0.166667	0.10119	0	0	0
120	.	.	.	.	.......(((((((((((.(((..(((.((..............)).)))...))).))))))))))).........................(((.(((....))).))).........	0.125	-0.291667	-0.166667	0.125	-0.291667	-0.166667	0.125	-0.291667	-0.166667	0	0	0
121	.	.	.	.	.......(((((((((((.(((..(((.((..............)).)))...))).))))))))))).........................(((.(((....))).)))..........	0.125	-0.291667	-0.166667	0.125	-0.291667	-0.166667	0.125	-0.291667	-0.166667	0	0	0
122	.	.	.	.	.......(((((((((((.(((..(((.((..............)).)))...))).))))))))))).........................(((.(((....))).)))...........	0.267857	-0.125	0.142857	0.267857	-0.125	0.142857	0.267857	-0.125	0.142857	0	0	0
123	.	.	.	.	.......(((((((((((.(((..(((.((..............)).)))...))).))))))))))).........................(((.(((....))).)))............	0.577381	-0.25	0.327381	0.577381	-0.25	0.327381	0.577381	-0.25	0.327381	0	0	0
124	.	.	.	.	.......(((((((((((.(((..(((.((..............)).)))...))).))))))))))).........................(((.(((....))).))).............	0.744048	-0.25	0.494048	0.744048	-0.25	0.494048	0.744048	-0.25	0.494048	0	0	0
125	.	.	.	.	.......(((((((((((.(((..(((.((..............)).)))...))).))))))))))).........................(((.(((....))).)))..............	1.02976	-0.25	0.779762	1.02976	-0.25	0.779762	1.02976	-0.25	0.779762	0	0	0
126	.	.	.	.	.......(((((((((((.(((..(((.((..............)).)))...))).))))))))))).........................(((.(((....))).)))...............	1.02976	-0.25	0.779762	1.02976	-0.25	0.779762	1.02976	-0.25	0.779762	0	0	0
127	.	.	.	.	.......(((((((((((.(((..(((.((..............)).)))...))).))))))))))).........................(((.(((....))).)))................	1.07143	-0.25	0.821429	1.07143	-0.25	0.821429	1.07143	-0.25	0.821429	0	0	0
128	.	.	.	.	.......(((((((((((.(((..(((.((..............)).)))...))).))))))))))).........................(((.(((....))).))).................	1.07143	-0.125	0.946429	1.07143	-0.125	0.946429	1.07143	-0.125	0.946429	0	0	0
129	.	.	.	.	.......(((((((((((.(((..(((.((..............)).)))...))).))))))))))).........................(((.(((....))).)))..................	0.761905	-0.125	0.636905	0.761905	-0.125	0.636905	0.761905	-0.125	0.636905	0	0	0
130	.	.	.	.	.......(((((((((((.(((..(((.((..............)).)))...))).))))))))))).........................(((.(((....))).)))...................	0.452381	-0.125	0.327381	0.452381	-0.125	0.327381	0.452381	-0.125	0.327381	0	0	0
131	.	.	.	.	.......(((((((((((.(((..(((.((..............)).)))...))).))))))))))).........................(((.(((....))).)))....................	0.452381	0	0.452381	0.452381	0	0.452381	0.452381	0	0.452381	0	0	0
132	.	.	.	.	.......(((((((((((.(((..(((.((..............)).)))...))).))))))))))).........................(((.(((....))).))).....................	0.166667	-0.125	0.0416667	0.166667	-0.125	0.0416667	0.166667	-0.125	0.0416667	0	0	0
133	.	.	.	.	.......(((((((((((.(((..(((.((..............)).)))...))).))))))))))).........................(((.(((....))).)))......................	0	-0.125	-0.125	0	-0.125	-0.125	0	-0.125	-0.125	0	0	0
134	.	.	.	.	.......(((((((((((.(((..(((.((..............)).)))...))).))))))))))).........................(((.(((....))).))).......................	0.166667	-0.125	0.0416667	0.166667	-0.125	0.0416667	0.166667	-0.125	0.0416667	0	0	0
135	.	.	.	.	.......(((((((((((.(((..(((.((..............)).)))...))).))))))))))).........................(((.(((....))).)))........................	0.458333	-0.125	0.333333	0.458333	-0.125	0.333333	0.458333	-0.125	0.333333	0	0	0
136	.	.	.	.	.......(((((((((((.(((..(((.((..............)).)))...))).))))))))))).........................(((.(((....))).))).........................	0.625	-0.125	0.5	0.625	-0.125	0.5	0.625	-0.125	0.5	0	0	0
137	.	.	.	.	.......(((((((((((.(((..(((.((..............)).)))...))).))))))))))).........................(((.(((....))).)))..........................	0.934524	-0.25	0.684524	0.934524	-0.25	0.684524	0.934524	-0.25	0.684524	0	0	0
138	.	.	.	.	.......(((((((((((.(((..(((.((..............)).)))...))).))))))))))).........................(((.(((....))).)))...........................	1.26786	-0.416667	0.85119	1.26786	-0.416667	0.85119	1.26786	-0.416667	0.85119	0	0	0
139	.	.	.	.	.......(((((((((((.(((..(((.((..............)).)))...))).))))))))))).........................(((.(((....))).)))............................	1.26786	-0.416667	0.85119	1.26786	-0.416667	0.85119	1.26786	-0.416667	0.85119	0	0	0
140	.	.	.	.	.......(((((((((((.(((..(((.((..............)).)))...))).))))))))))).........................(((.(((....))).))).............................	1.3869	-0.291667	1.09524	1.3869	-0.291667	1.09524	1.3869	-0.291667	1.09524	0	0	0
141	.	.	.	.	.......(((((((((((.(((..(((.((..............)).)))...))).))))))))))).........................(((.(((....))).)))..............................	1.22024	-0.291667	0.928571	1.22024	-0.291667	0.928571	1.22024	-0.291667	0.928571	0	0	0
142	(	.	.	.	.......(((((((((((.(((..(((.((..............)).)))...))).))))))))))).........................(((.(((....))).)))...............................	1.17857	-0.291667	0.886905	0	0	0	1.17857	-0.291667	0.886905	1.17857	-0.291667	0.886905
143	(	.	.	.	.......(((((((((((.(((..(((.((..............)).)))...))).))))))))))).........................(((.(((....))).)))................................	1.02976	-0.291667	0.738095	0	0	0	1.02976	-0.291667	0.738095	1.02976	-0.291667	0.738095
144	(	.	.	.	.......(((((((((((.(((..(((.((..............)).)))...))).))))))))))).........................(((.(((....))).))).................................	0.839286	-0.125	0.714286	0	0	0	0.839286	-0.125	0.714286	0.839286	-0.125	0.714286
145	(	.	.	.	.......(((((((((((.(((..(((.((..............)).)))...))).))))))))))).........................(((.(((....))).)))..................................	0.839286	0	0.839286	0	0	0	0.839286	0	0.839286	0.839286	0	0.839286
146	(	.	.	.	.......(((((((((((.(((..(((.((..............)).)))...))).))))))))))).........................(((.(((....))).)))...................................	0.839286	-0.125	0.714286	0	0	0	0.839286	-0.125	0.714286	0.839286	-0.125	0.714286
147	.	.	.	.	.......(((((((((((.(((..(((.((..............)).)))...))).))))))))))).........................(((.(((....))).)))....................................	0.553571	-0.125	0.428571	0.553571	-0.125	0.428571	0.553571	-0.125	0.428571	0	0	0
148	(	.	.	.	.......(((((((((((.(((..(((.((..............)).)))...))).))))))))))).........................(((.(((....))).))).....................................	0.553571	-0.125	0.428571	0	0	0	0.553571	-0.125	0.428571	0.553571	-0.125	0.428571
149	(	.	.	.	.......(((((((((((.(((..(((.((..............)).)))...))).))))))))))).........................(((.(((....))).)))......................................	0.720238	-0.125	0.595238	0	0	0	0.720238	-0.125	0.595238	0.720238	-0.125	0.595238
150	(	.	.	.	.......(((((((((((.(((..(((.((..............)).)))...))).))))))))))).........................(((.(((....))).))).......................................	0.452381	-0.125	0.327381	0	0	0	0.452381	-0.125	0.327381	0.452381	-0.125	0.327381
151	.	.	.	.	.......(((((((((((.(((..(((.((..............)).)))...))).))))))))))).........................(((.(((....))).)))........................................	0.309524	-0.125	0.184524	0.309524	-0.125	0.184524	0.309524	-0.125	0.184524	0	0	0
152	(	(	.	(	.......(((((((((((.(((..(((.((..............)).)))...))).))))))))))).........................(((.(((....))).)))........................................(	0.309524	-0.125	0.184524	0	0	0	0	0	0	0	0	0
153	(	(	.	(	.......(((((((((((.(((..(((.((..............)).)))...))).))))))))))).........................(((.(((....))).)))........................................((	0.309524	-0.125	0.184524	0	0	0	0	0	0	0	0	0
154	(	(	.	(	.......(((((((((((.(((..(((.((..............)).)))...))).))))))))))).........................(((.(((....))).)))........................................(((	0.309524	0	0.309524	0	0	0	0	0	0	0	0	0
155	(	(	.	(	.......(((((((((((.(((..(((.((..............)).)))...))).))))))))))).........................(((.(((....))).)))........................................((((	0.142857	0	0.142857	0	0	0	0	0	0	0	0	0
156	.	(	.	(	.......(((((((((((.(((..(((.((..............)).)))...))).))))))))))).........................(((.(((....))).)))........................................(((((	0.267857	0	0.267857	0.267857	0	0.267857	0	0	0	-0.267857	0	-0.267857
157	(	(	.	(	.......(((((((((((.(((..(((.((..............)).)))...))).))))))))))).........................(((.(((....))).)))........................................((((((	0.267857	-0.125	0.142857	0	0	0	0	0	0	0	0	0
158	(	(	.	(	.......(((((((((((.(((..(((.((..............)).)))...))).))))))))))).........................(((.(((....))).)))........................................(((((((	0.25	-0.125	0.125	0	0	0	0	0	0	0	0	0
159	(	(	.	(	.......(((((((((((.(((..(((.((..............)).)))...))).))))))))))).........................(((.(((....))).)))........................................((((((((	0.25	-0.25	0	0	0	0	0	0	0	0	0	0
160	(	(	.	(	.......(((((((((((.(((..(((.((..............)).)))...))).))))))))))).........................(((.(((....))).)))........................................(((((((((	0.25	-0.25	0	0	0	0	0	0	0	0	0	0
161	(	(	.	(	.......(((((((((((.(((..(((.((..............)).)))...))).))))))))))).........................(((.(((....))).)))........................................((((((((((	0.25	-0.25	0	0	0	0	0	0	0	0	0	0
162	(	(	.	(	.......(((((((((((.(((..(((.((..............)).)))...))).))))))))))).........................(((.(((....))).)))........................................(((((((((((	0.392857	-0.25	0.142857	0	0	0	0	0	0	0	0	0
163	(	.	.	.	.......(((((((((((.(((..(((.((..............)).)))...))).))))))))))).........................(((.(((....))).)))........................................(((((((((((.	0.535714	-0.25	0.285714	0	0	0	0.535714	-0.25	0.285714	0.535714	-0.25	0.285714
164	.	.	.	.	.......(((((((((((.(((..(((.((..............)).)))...))).))))))))))).........................(((.(((....))).)))........................................(((((((((((..	0.696429	-0.25	0.446429	0.696429	-0.25	0.446429	0.696429	-0.25	0.446429	0	0	0
165	.	.	.	.	.......(((((((((((.(((..(((.((..............)).)))...))).))))))))))).........................(((.(((....))).)))........................................(((((((((((...	0.696429	-0.125	0.571429	0.696429	-0.125	0.571429	0.696429	-0.125	0.571429	0	0	0
166	.	.	.	.	.......(((((((((((.(((..(((.((..............)).)))...))).))))))))))).........................(((.(((....))).)))........................................(((((((((((....	0.571429	-0.125	0.446429	0.571429	-0.125	0.446429	0.571429	-0.125	0.446429	0	0	0
167	(	.	.	.	.......(((((((((((.(((..(((.((..............)).)))...))).))))))))))).........................(((.(((....))).)))........................................(((((((((((.....	0.571429	-0.166667	0.404762	0	0	0	0.571429	-0.166667	0.404762	0.571429	-0.166667	0.404762
168	(	.	.	.	.......(((((((((((.(((..(((.((..............)).)))...))).))))))))))).........................(((.(((....))).)))........................................(((((((((((......	0.571429	-0.333333	0.238095	0	0	0	0.571429	-0.333333	0.238095	0.571429	-0.333333	0.238095
169	(	.	.	.	.......(((((((((((.(((..(((.((..............)).)))...))).))))))))))).........................(((.(((....))).)))........................................(((((((((((.......	0.428571	-0.333333	0.0952381	0	0	0	0.428571	-0.333333	0.0952381	0.428571	-0.333333	0.0952381
170	.	.	.	.	.......(((((((((((.(((..(((.((..............)).)))...))).))))))))))).........................(((.(((....))).)))........................................(((((((((((........	0.285714	-0.333333	-0.047619	0.285714	-0.333333	-0.047619	0.285714	-0.333333	-0.047619	0	0	0
171	.	.	.	.	.......(((((((((((.(((..(((.((..............)).)))...))).))))))))))).........................(((.(((....))).)))........................................(((((((((((.........	0	-0.333333	-0.333333	0	-0.333333	-0.333333	0	-0.333333	-0.333333	0	0	0
172	.	.	.	.	.......(((((((((((.(((..(((.((..............)).)))...))).))))))))))).........................(((.(((....))).)))........................................(((((((((((..........	0	-0.333333	-0.333333	0	-0.333333	-0.333333	0	-0.333333	-0.333333	0	0	0
173	.	.	.	.	.......(((((((((((.(((..(((.((..............)).)))...))).))))))))))).........................(((.(((....))).)))........................................(((((((((((...........	0	-0.166667	-0.166667	0	-0.166667	-0.166667	0	-0.166667	-0.166667	0	0	0
174	)	.	.	.	.......(((((((((((.(((..(((.((..............)).)))...))).))))))))))).........................(((.(((....))).)))........................................(((((((((((............	0	0	0	0	0	0	0	0	0	0	0	0
175	)	.	.	.	.......(((((((((((.(((..(((.((..............)).)))...))).))))))))))).........................(((.(((....))).)))........................................(((((((((((.............	0	0	0	0	0	0	0	0	0	0	0	0
176	)	.	.	.	.......(((((((((((.(((..(((.((..............)).)))...))).))))))))))).........................(((.(((....))).)))........................................(((((((((((..............	0	0	0	0	0	0	0	0	0	0	0	0
177	.	.	.	.	.......(((((((((((.(((..(((.((..............)).)))...))).))))))))))).........................(((.(((....))).)))........................................(((((((((((...............	0	0	0	0	0	0	0	0	0	0	0	0
178	.	.	.	.	.......(((((((((((.(((..(((.((..............)).)))...))).))))))))))).........................(((.(((....))).)))........................................(((((((((((................	0	0	0	0	0	0	0	0	0	0	0	0
179	.	.	.	.	.......(((((((((((.(((..(((.((..............)).)))...))).))))))))))).........................(((.(((....))).)))........................................(((((((((((.................	0	0	0	0	0	0	0	0	0	0	0	0
180	)	.	.	.	.......(((((((((((.(((..(((.((..............)).)))...))).))))))))))).........................(((.(((....))).)))........................................(((((((((((..................	0.285714	0	0.285714	0	0	0	0.285714	0	0.285714	0.285714	0	0.285714
181	)	.	.	.	.......(((((((((((.(((..(((.((..............)).)))...))).))))))))))).........................(((.(((....))).)))........................................(((((((((((...................	0.285714	0	0.285714	0	0	0	0.285714	0	0.285714	0.285714	0	0.285714
182	)	.	.	.	.......(((((((((((.(((..(((.((..............)).)))...))).))))))))))).........................(((.(((....))).)))........................................(((((((((((....................	0.619048	0	0.619048	0	0	0	0.619048	0	0.619048	0.619048	0	0.619048
183	.	.	.	.	.......(((((((((((.(((..(((.((..............)).)))...))).))))))))))).........................(((.(((....))).)))........................................(((((((((((.....................	0.785714	0	0.785714	0.785714	0	0.785714	0.785714	0	0.785714	0	0	0
184	.	.	.	.	.......(((((((((((.(((..(((.((..............)).)))...))).))))))))))).........................(((.(((....))).)))........................................(((((((((((......................	0.952381	0	0.952381	0.952381	0	0.952381	0.952381	0	0.952381	0	0	0
185	)	(	.	(	.......(((((((((((.(((..(((.((..............)).)))...))).))))))))))).........................(((.(((....))).)))........................................(((((((((((......................(	1.24405	0	1.24405	0	0	0	0	0	0	0	0	0
186	)	(	.	(	.......(((((((((((.(((..(((.((..............)).)))...))).))))))))))).........................(((.(((....))).)))........................................(((((((((((......................((	1.24405	-0.125	1.11905	0	0	0	0	0	0	0	0	0
187	)	(	.	(	.......(((((((((((.(((..(((.((..............)).)))...))).))))))))))).........................(((.(((....))).)))........................................(((((((((((......................(((	0.958333	-0.25	0.708333	0	0	0	0	0	0	0	0	0
188	)	.	.	.	.......(((((((((((.(((..(((.((..............)).)))...))).))))))))))).........................(((.(((....))).)))........................................(((((((((((......................(((.	0.767857	-0.25	0.517857	0	0	0	0.767857	-0.25	0.517857	0.767857	-0.25	0.517857
189	.	.	.	.	.......(((((((((((.(((..(((.((..............)).)))...))).))))))))))).........................(((.(((....))).)))........................................(((((((((((......................(((..	0.60119	-0.25	0.35119	0.60119	-0.25	0.35119	0.60119	-0.25	0.35119	0	0	0
190	.	.	.	.	.......(((((((((((.(((..(((.((..............)).)))...))).))))))))))).........................(((.(((....))).)))........................................(((((((((((......................(((...	0.434524	-0.25	0.184524	0.434524	-0.25	0.184524	0.434524	-0.25	0.184524	0	0	0
191	.	.	.	.	.......(((((((((((.(((..(((.((..............)).)))...))).))))))))))).........................(((.(((....))).)))........................................(((((((((((......................(((....	0.434524	-0.25	0.184524	0.434524	-0.25	0.184524	0.434524	-0.25	0.184524	0	0	0
192	.	.	.	.	.......(((((((((((.(((..(((.((..............)).)))...))).))))))))))).........................(((.(((....))).)))........................................(((((((((((......................(((.....	0.434524	-0.25	0.184524	0.434524	-0.25	0.184524	0.434524	-0.25	0.184524	0	0	0
193	.	.	.	.	.......(((((((((((.(((..(((.((..............)).)))...))).))))))))))).........................(((.(((....))).)))........................................(((((((((((......................(((......	0.309524	-0.25	0.0595238	0.309524	-0.25	0.0595238	0.309524	-0.25	0.0595238	0	0	0
194	.	)	.	)	.......(((((((((((.(((..(((.((..............)).)))...))).))))))))))).........................(((.(((....))).)))........................................(((((((((((......................(((......)	0.309524	-0.125	0.184524	0.309524	-0.125	0.184524	0	0	0	-0.309524	0.125	-0.184524
195	.	)	.	)	.......(((((((((((.(((..(((.((..............)).)))...))).))))))))))).........................(((.(((....))).)))........................................(((((((((((......................(((......))	0.166667	0	0.166667	0.166667	0	0.166667	0	0	0	-0.166667	0	-0.166667
196	.	)	.	)	.......(((((((((((.(((..(((.((..............)).)))...))).))))))))))).........................(((.(((....))).)))........................................(((((((((((......................(((......)))	0.333333	-0.125	0.208333	0.333333	-0.125	0.208333	0	0	0	-0.333333	0.125	-0.208333
197	.	.	.	.	.......(((((((((((.(((..(((.((..............)).)))...))).))))))))))).........................(((.(((....))).)))........................................(((((((((((......................(((......))).	0.5	-0.125	0.375	0.5	-0.125	0.375	0.5	-0.125	0.375	0	0	0
198	(	(	.	(	.......(((((((((((.(((..(((.((..............)).)))...))).))))))))))).........................(((.(((....))).)))........................................(((((((((((......................(((......))).(	0.666667	-0.125	0.541667	0	0	0	0	0	0	0	0	0
199	(	(	.	(	.......(((((((((((.(((..(((.((..............)).)))...))).))))))))))).........................(((.(((....))).)))........................................(((((((((((......................(((......))).((	0.791667	-0.125	0.666667	0	0	0	0	0	0	0	0	0
200	(	(	.	(	.......(((((((((((.(((..(((.((..............)).)))...))).))))))))))).........................(((.(((....))).)))........................................(((((((((((......................(((......))).(((	0.791667	-0.125	0.666667	0	0	0	0	0	0	0	0	0
201	.	.	.	.	.......(((((((((((.(((..(((.((..............)).)))...))).))))))))))).........................(((.(((....))).)))........................................(((((((((((......................(((......))).(((.	0.791667	-0.125	0.666667	0.791667	-0.125	0.666667	0.791667	-0.125	0.666667	0	0	0
202	(	(	.	(	.......(((((((((((.(((..(((.((..............)).)))...))).))))))))))).........................(((.(((....))).)))........................................(((((((((((......................(((......))).(((.(	0.767857	-0.125	0.642857	0	0	0	0	0	0	0	0	0
203	(	(	.	(	.......(((((((((((.(((..(((.((..............)).)))...))).))))))))))).........................(((.(((....))).)))........................................(((((((((((......................(((......))).(((.((	0.720238	-0.125	0.595238	0	0	0	0	0	0	0	0	0
204	(	(	.	(	.......(((((((((((.(((..(((.((..............)).)))...))).))))))))))).........................(((.(((....))).)))........................................(((((((((((......................(((......))).(((.(((	0.553571	0	0.553571	0	0	0	0	0	0	0	0	0
205	.	.	.	.	.......(((((((((((.(((..(((.((..............)).)))...))).))))))))))).........................(((.(((....))).)))........................................(((((((((((......................(((......))).(((.(((.	0.720238	0	0.720238	0.720238	0	0.720238	0.720238	0	0.720238	0	0	0
206	(	(	.	(	.......(((((((((((.(((..(((.((..............)).)))...))).))))))))))).........................(((.(((....))).)))........................................(((((((((((......................(((......))).(((.(((.(	0.886905	0	0.886905	0	0	0	0	0	0	0	0	0
207	(	(	.	(	.......(((((((((((.(((..(((.((..............)).)))...))).))))))))))).........................(((.(((....))).)))........................................(((((((((((......................(((......))).(((.(((.((	1.04762	-0.142857	0.904762	0	0	0	0	0	0	0	0	0
208	(	(	.	(	.......(((((((((((.(((..(((.((..............)).)))...))).))))))))))).........................(((.(((....))).)))........................................(((((((((((......................(((......))).(((.(((.(((	1.21429	-0.309524	0.904762	0	0	0	0	0	0	0	0	0
209	.	.	.	.	.......(((((((((((.(((..(((.((..............)).)))...))).))))))))))).........................(((.(((....))).)))........................................(((((((((((......................(((......))).(((.(((.(((.	1.07143	-0.47619	0.595238	1.07143	-0.47619	0.595238	1.07143	-0.47619	0.595238	0	0	0
210	.	.	.	.	.......(((((((((((.(((..(((.((..............)).)))...))).))))))))))).........................(((.(((....))).)))........................................(((((((((((......................(((......))).(((.(((.(((..	0.785714	-0.47619	0.309524	0.785714	-0.47619	0.309524	0.785714	-0.47619	0.309524	0	0	0
211	(	(	.	(	.......(((((((((((.(((..(((.((..............)).)))...))).))))))))))).........................(((.(((....))).)))........................................(((((((((((......................(((......))).(((.(((.(((..(	0.744048	-0.60119	0.142857	0	0	0	0	0	0	0	0	0
212	(	(	.	(	.......(((((((((((.(((..(((.((..............)).)))...))).))))))))))).........................(((.(((....))).)))........................................(((((((((((......................(((......))).(((.(((.(((..((	0.577381	-0.60119	-0.0238095	0	0	0	0	0	0	0	0	0
213	.	.	.	.	.......(((((((((((.(((..(((.((..............)).)))...))).))))))))))).........................(((.(((....))).)))........................................(((((((((((......................(((......))).(((.(((.(((..((.	0.577381	-0.60119	-0.0238095	0.577381	-0.60119	-0.0238095	0.577381	-0.60119	-0.0238095	0	0	0
214	.	.	.	.	.......(((((((((((.(((..(((.((..............)).)))...))).))))))))))).........................(((.(((....))).)))........................................(((((((((((......................(((......))).(((.(((.(((..((..	0.125	-0.291667	-0.166667	0.125	-0.291667	-0.166667	0.125	-0.291667	-0.166667	0	0	0
215	.	.	.	.	.......(((((((((((.(((..(((.((..............)).)))...))).))))))))))).........................(((.(((....))).)))........................................(((((((((((......................(((......))).(((.(((.(((..((...	0.291667	-0.125	0.166667	0.291667	-0.125	0.166667	0.291667	-0.125	0.166667	0	0	0
216	.	.	.	.	.......(((((((((((.(((..(((.((..............)).)))...))).))))))))))).........................(((.(((....))).)))........................................(((((((((((......................(((......))).(((.(((.(((..((....	0.291667	-0.125	0.166667	0.291667	-0.125	0.166667	0.291667	-0.125	0.166667	0	0	0
217	.	.	.	.	.......(((((((((((.(((..(((.((..............)).)))...))).))))))))))).........................(((.(((....))).)))........................................(((((((((((......................(((......))).(((.(((.(((..((.....	0.291667	-0.25	0.0416667	0.291667	-0.25	0.0416667	0.291667	-0.25	0.0416667	0	0	0
218	.	.	.	.	.......(((((((((((.(((..(((.((..............)).)))...))).))))))))))).........................(((.(((....))).)))........................................(((((((((((......................(((......))).(((.(((.(((..((......	0.291667	-0.25	0.0416667	0.291667	-0.25	0.0416667	0.291667	-0.25	0.0416667	0	0	0
219	.	.	.	.	.......(((((((((((.(((..(((.((..............)).)))...))).))))))))))).........................(((.(((....))).)))........................................(((((((((((......................(((......))).(((.(((.(((..((.......	0.166667	-0.125	0.0416667	0.166667	-0.125	0.0416667	0.166667	-0.125	0.0416667	0	0	0
220	.	.	.	.	.......(((((((((((.(((..(((.((..............)).)))...))).))))))))))).........................(((.(((....))).)))........................................(((((((((((......................(((......))).(((.(((.(((..((........	0.166667	-0.125	0.0416667	0.166667	-0.125	0.0416667	0.166667	-0.125	0.0416667	0	0	0
221	.	.	.	.	.......(((((((((((.(((..(((.((..............)).)))...))).))))))))))).........................(((.(((....))).)))........................................(((((((((((......................(((......))).(((.(((.(((..((.........	0.166667	-0.125	0.0416667	0.166667	-0.125	0.0416667	0.166667	-0.125	0.0416667	0	0	0
222	.	.	.	.	.......(((((((((((.(((..(((.((..............)).)))...))).))))))))))).........................(((.(((....))).)))........................................(((((((((((......................(((......))).(((.(((.(((..((..........	0.166667	-0.125	0.0416667	0.166667	-0.125	0.0416667	0.166667	-0.125	0.0416667	0	0	0
223	.	.	.	.	.......(((((((((((.(((..(((.((..............)).)))...))).))))))))))).........................(((.(((....))).)))........................................(((((((((((......................(((......))).(((.(((.(((..((...........	0.166667	-0.125	0.0416667	0.166667	-0.125	0.0416667	0.166667	-0.125	0.0416667	0	0	0
224	.	.	.	.	.......(((((((((((.(((..(((.((..............)).)))...))).))))))))))).........................(((.(((....))).)))........................................(((((((((((......................(((......))).(((.(((.(((..((............	0.166667	-0.125	0.0416667	0.166667	-0.125	0.0416667	0.166667	-0.125	0.0416667	0	0	0
225	.	.	.	.	.......(((((((((((.(((..(((.((..............)).)))...))).))))))))))).........................(((.(((....))).)))........................................(((((((((((......................(((......))).(((.(((.(((..((.............	0.166667	0	0.166667	0.166667	0	0.166667	0.166667	0	0.166667	0	0	0
226	)	)	.	)	.......(((((((((((.(((..(((.((..............)).)))...))).))))))))))).........................(((.(((....))).)))........................................(((((((((((......................(((......))).(((.(((.(((..((.............)	0.166667	0	0.166667	0	0	0	0	0	0	0	0	0
227	)	)	.	)	.......(((((((((((.(((..(((.((..............)).)))...))).))))))))))).........................(((.(((....))).)))........................................(((((((((((......................(((......))).(((.(((.(((..((.............))	0.166667	0	0.166667	0	0	0	0	0	0	0	0	0
228	.	.	.	.	.......(((((((((((.(((..(((.((..............)).)))...))).))))))))))).........................(((.(((....))).)))........................................(((((((((((......................(((......))).(((.(((.(((..((.............)).	0.333333	0	0.333333	0.333333	0	0.333333	0.333333	0	0.333333	0	0	0
229	)	)	.	)	.......(((((((((((.(((..(((.((..............)).)))...))).))))))))))).........................(((.(((....))).)))........................................(((((((((((......................(((......))).(((.(((.(((..((.............)).)	0.47619	-0.142857	0.333333	0	0	0	0	0	0	0	0	0
230	)	)	.	)	.......(((((((((((.(((..(((.((..............)).)))...))).))))))))))).........................(((.(((....))).)))........................................(((((((((((......................(((......))).(((.(((.(((..((.............)).))	0.47619	-0.142857	0.333333	0	0	0	0	0	0	0	0	0
231	)	)	.	)	.......(((((((((((.(((..(((.((..............)).)))...))).))))))))))).........................(((.(((....))).)))........................................(((((((((((......................(((......))).(((.(((.(((..((.............)).)))	0.47619	-0.142857	0.333333	0	0	0	0	0	0	0	0	0
232	)	)	.	)	.......(((((((((((.(((..(((.((..............)).)))...))).))))))))))).........................(((.(((....))).)))........................................(((((((((((......................(((......))).(((.(((.(((..((.............)).))))	0.47619	-0.142857	0.333333	0	0	0	0	0	0	0	0	0
233	)	)	.	)	.......(((((((((((.(((..(((.((..............)).)))...))).))))))))))).........................(((.(((....))).)))........................................(((((((((((......................(((......))).(((.(((.(((..((.............)).)))))	0.434524	-0.142857	0.291667	0	0	0	0	0	0	0	0	0
234	)	)	.	)	.......(((((((((((.(((..(((.((..............)).)))...))).))))))))))).........................(((.(((....))).)))........................................(((((((((((......................(((......))).(((.(((.(((..((.............)).))))))	0.392857	-0.142857	0.25	0	0	0	0	0	0	0	0	0
235	)	)	.	)	.......(((((((((((.(((..(((.((..............)).)))...))).))))))))))).........................(((.(((....))).)))........................................(((((((((((......................(((......))).(((.(((.(((..((.............)).)))))))	0.535714	-0.267857	0.267857	0	0	0	0	0	0	0	0	0
236	)	)	.	)	.......(((((((((((.(((..(((.((..............)).)))...))).))))))))))).........................(((.(((....))).)))........................................(((((((((((......................(((......))).(((.(((.(((..((.............)).))))))))	0.678571	-0.125	0.553571	0	0	0	0	0	0	0	0	0
237	)	)	.	)	.......(((((((((((.(((..(((.((..............)).)))...))).))))))))))).........................(((.(((....))).)))........................................(((((((((((......................(((......))).(((.(((.(((..((.............)).)))))))))	0.678571	-0.125	0.553571	0	0	0	0	0	0	0	0	0
238	.	.	.	.	.......(((((((((((.(((..(((.((..............)).)))...))).))))))))))).........................(((.(((....))).)))........................................(((((((((((......................(((......))).(((.(((.(((..((.............)).))))))))).	0.845238	-0.25	0.595238	0.845238	-0.25	0.595238	0.845238	-0.25	0.595238	0	0	0
239	.	.	.	.	.......(((((((((((.(((..(((.((..............)).)))...))).))))))))))).........................(((.(((....))).)))........................................(((((((((((......................(((......))).(((.(((.(((..((.............)).)))))))))..	1.17857	-0.25	0.928571	1.17857	-0.25	0.928571	1.17857	-0.25	0.928571	0	0	0
240	)	.	.	.	.......(((((((((((.(((..(((.((..............)).)))...))).))))))))))).........................(((.(((....))).)))........................................(((((((((((......................(((......))).(((.(((.(((..((.............)).)))))))))...	1.17857	-0.25	0.928571	0	0	0	1.17857	-0.25	0.928571	1.17857	-0.25	0.928571
241	)	.	.	.	.......(((((((((((.(((..(((.((..............)).)))...))).))))))))))).........................(((.(((....))).)))........................................(((((((((((......................(((......))).(((.(((.(((..((.............)).)))))))))....	1.05357	-0.25	0.803571	0	0	0	1.05357	-0.25	0.803571	1.05357	-0.25	0.803571
242	)	.	.	.	.......(((((((((((.(((..(((.((..............)).)))...))).))))))))))).........................(((.(((....))).)))........................................(((((((((((......................(((......))).(((.(((.(((..((.............)).))))))))).....	0.785714	-0.25	0.535714	0	0	0	0.785714	-0.25	0.535714	0.785714	-0.25	0.535714
243	)	.	.	.	.......(((((((((((.(((..(((.((..............)).)))...))).))))))))))).........................(((.(((....))).)))........................................(((((((((((......................(((......))).(((.(((.(((..((.............)).)))))))))......	0.5	-0.125	0.375	0	0	0	0.5	-0.125	0.375	0.5	-0.125	0.375
244	.	.	.	.	.......(((((((((((.(((..(((.((..............)).)))...))).))))))))))).........................(((.(((....))).)))........................................(((((((((((......................(((......))).(((.(((.(((..((.............)).))))))))).......	0.333333	-0.125	0.208333	0.333333	-0.125	0.208333	0.333333	-0.125	0.208333	0	0	0
245	)	.	.	.	.......(((((((((((.(((..(((.((..............)).)))...))).))))))))))).........................(((.(((....))).)))........................................(((((((((((......................(((......))).(((.(((.(((..((.............)).)))))))))........	0	-0.291667	-0.291667	0	0	0	0	-0.291667	-0.291667	0	-0.291667	-0.291667
246	)	(	.	(	.......(((((((((((.(((..(((.((..............)).)))...))).))))))))))).........................(((.(((....))).)))........................................(((((((((((......................(((......))).(((.(((.(((..((.............)).)))))))))........(	0	-0.333333	-0.333333	0	0	0	0	0	0	0	0	0
247	)	(	.	(	.......(((((((((((.(((..(((.((..............)).)))...))).))))))))))).........................(((.(((....))).)))........................................(((((((((((......................(((......))).(((.(((.(((..((.............)).)))))))))........((	0	-0.333333	-0.333333	0	0	0	0	0	0	0	0	0
248	.	.	.	.	.......(((((((((((.(((..(((.((..............)).)))...))).))))))))))).........................(((.(((....))).)))........................................(((((((((((......................(((......))).(((.(((.(((..((.............)).)))))))))........((.	0	-0.333333	-0.333333	0	-0.333333	-0.333333	0	-0.333333	-0.333333	0	0	0
249	.	(	.	(	.......(((((((((((.(((..(((.((..............)).)))...))).))))))))))).........................(((.(((....))).)))........................................(((((((((((......................(((......))).(((.(((.(((..((.............)).)))))))))........((.(	0	-0.333333	-0.333333	0	-0.333333	-0.333333	0	0	0	0	0.333333	0.333333
250	.	(	.	(	.......(((((((((((.(((..(((.((..............)).)))...))).))))))))))).........................(((.(((....))).)))........................................(((((((((((......................(((......))).(((.(((.(((..((.............)).)))))))))........((.((	0.125	-0.333333	-0.208333	0.125	-0.333333	-0.208333	0	0	0	-0.125	0.333333	0.208333
251	)	(	.	(	.......(((((((((((.(((..(((.((..............)).)))...))).))))))))))).........................(((.(((....))).)))........................................(((((((((((......................(((......))).(((.(((.(((..((.............)).)))))))))........((.(((	0.125	-0.166667	-0.0416667	0	0	0	0	0	0	0	0	0
252	)	(	.	(	.......(((((((((((.(((..(((.((..............)).)))...))).))))))))))).........................(((.(((....))).)))........................................(((((((((((......................(((......))).(((.(((.(((..((.............)).)))))))))........((.((((	0.267857	0	0.267857	0	0	0	0	0	0	0	0	0
253	)	(	.	(	.......(((((((((((.(((..(((.((..............)).)))...))).))))))))))).........................(((.(((....))).)))........................................(((((((((((......................(((......))).(((.(((.(((..((.............)).)))))))))........((.(((((	0.267857	0	0.267857	0	0	0	0	0	0	0	0	0
254	)	(	.	(	.......(((((((((((.(((..(((.((..............)).)))...))).))))))))))).........................(((.(((....))).)))........................................(((((((((((......................(((......))).(((.(((.(((..((.............)).)))))))))........((.((((((	0.267857	0	0.267857	0	0	0	0	0	0	0	0	0
255	)	.	.	.	.......(((((((((((.(((..(((.((..............)).)))...))).))))))))))).........................(((.(((....))).)))........................................(((((((((((......................(((......))).(((.(((.(((..((.............)).)))))))))........((.((((((.	0.267857	0	0.267857	0	0	0	0.267857	0	0.267857	0.267857	0	0.267857
256	.	(	.	(	.......(((((((((((.(((..(((.((..............)).)))...))).))))))))))).........................(((.(((....))).)))........................................(((((((((((......................(((......))).(((.(((.(((..((.............)).)))))))))........((.((((((.(	0.267857	0	0.267857	0.267857	0	0.267857	0	0	0	-0.267857	0	-0.267857
257	.	(	.	(	.......(((((((((((.(((..(((.((..............)).)))...))).))))))))))).........................(((.(((....))).)))........................................(((((((((((......................(((......))).(((.(((.(((..((.............)).)))))))))........((.((((((.((	0.267857	-0.166667	0.10119	0.267857	-0.166667	0.10119	0	0	0	-0.267857	0.166667	-0.10119
258	.	.	.	.	.......(((((((((((.(((..(((.((..............)).)))...))).))))))))))).........................(((.(((....))).)))........................................(((((((((((......................(((......))).(((.(((.(((..((.............)).)))))))))........((.((((((.((.	0.142857	-0.166667	-0.0238095	0.142857	-0.166667	-0.0238095	0.142857	-0.166667	-0.0238095	0	0	0
259	(	(	.	(	.......(((((((((((.(((..(((.((..............)).)))...))).))))))))))).........................(((.(((....))).)))........................................(((((((((((......................(((......))).(((.(((.(((..((.............)).)))))))))........((.((((((.((.(	0.125	-0.291667	-0.166667	0	0	0	0	0	0	0	0	0
260	(	(	.	(	.......(((((((((((.(((..(((.((..............)).)))...))).))))))))))).........................(((.(((....))).)))........................................(((((((((((......................(((......))).(((.(((.(((..((.............)).)))))))))........((.((((((.((.((	0.267857	-0.291667	-0.0238095	0	0	0	0	0	0	0	0	0
261	.	.	.	.	.......(((((((((((.(((..(((.((..............)).)))...))).))))))))))).........................(((.(((....))).)))........................................(((((((((((......................(((......))).(((.(((.(((..((.............)).)))))))))........((.((((((.((.((.	0.267857	-0.291667	-0.0238095	0.267857	-0.291667	-0.0238095	0.267857	-0.291667	-0.0238095	0	0	0
262	.	.	.	.	.......(((((((((((.(((..(((.((..............)).)))...))).))))))))))).........................(((.(((....))).)))........................................(((((((((((......................(((......))).(((.(((.(((..((.............)).)))))))))........((.((((((.((.((..	0.267857	-0.291667	-0.0238095	0.267857	-0.291667	-0.0238095	0.267857	-0.291667	-0.0238095	0	0	0
263	.	(	.	(	.......(((((((((((.(((..(((.((..............)).)))...))).))))))))))).........................(((.(((....))).)))........................................(((((((((((......................(((......))).(((.(((.(((..((.............)).)))))))))........((.((((((.((.((..(	0.267857	-0.125	0.142857	0.267857	-0.125	0.142857	0	0	0	-0.267857	0.125	-0.142857
264	.	(	.	(	.......(((((((((((.(((..(((.((..............)).)))...))).))))))))))).........................(((.(((....))).)))........................................(((((((((((......................(((......))).(((.(((.(((..((.............)).)))))))))........((.((((((.((.((..((	0.267857	-0.125	0.142857	0.267857	-0.125	0.142857	0	0	0	-0.267857	0.125	-0.142857
265	.	(	.	(	.......(((((((((((.(((..(((.((..............)).)))...))).))))))))))).........................(((.(((....))).)))........................................(((((((((((......................(((......))).(((.(((.(((..((.............)).)))))))))........((.((((((.((.((..(((	0.392857	-0.125	0.267857	0.392857	-0.125	0.267857	0	0	0	-0.392857	0.125	-0.267857
266	.	.	.	.	.......(((((((((((.(((..(((.((..............)).)))...))).))))))))))).........................(((.(((....))).)))........................................(((((((((((......................(((......))).(((.(((.(((..((.............)).)))))))))........((.((((((.((.((..(((.	0.392857	-0.125	0.267857	0.392857	-0.125	0.267857	0.392857	-0.125	0.267857	0	0	0
267	.	.	.	.	.......(((((((((((.(((..(((.((..............)).)))...))).))))))))))).........................(((.(((....))).)))........................................(((((((((((......................(((......))).(((.(((.(((..((.............)).)))))))))........((.((((((.((.((..(((..	0.125	0	0.125	0.125	0	0.125	0.125	0	0.125	0	0	0
268	.	.	.	.	.......(((((((((((.(((..(((.((..............)).)))...))).))))))))))).........................(((.(((....))).)))........................................(((((((((((......................(((......))).(((.(((.(((..((.............)).)))))))))........((.((((((.((.((..(((...	0.125	0	0.125	0.125	0	0.125	0.125	0	0.125	0	0	0
269	.	.	.	.	.......(((((((((((.(((..(((.((..............)).)))...))).))))))))))).........................(((.(((....))).)))........................................(((((((((((......................(((......))).(((.(((.(((..((.............)).)))))))))........((.((((((.((.((..(((....	0.125	0	0.125	0.125	0	0.125	0.125	0	0.125	0	0	0
270	.	)	.	)	.......(((((((((((.(((..(((.((..............)).)))...))).))))))))))).........................(((.(((....))).)))........................................(((((((((((......................(((......))).(((.(((.(((..((.............)).)))))))))........((.((((((.((.((..(((....)	0.267857	0	0.267857	0.267857	0	0.267857	0	0	0	-0.267857	0	-0.267857
271	.	)	.	)	.......(((((((((((.(((..(((.((..............)).)))...))).))))))))))).........................(((.(((....))).)))........................................(((((((((((......................(((......))).(((.(((.(((..((.............)).)))))))))........((.((((((.((.((..(((....))	0.267857	0	0.267857	0.267857	0	0.267857	0	0	0	-0.267857	0	-0.267857
272	.	)	.	)	.......(((((((((((.(((..(((.((..............)).)))...))).))))))))))).........................(((.(((....))).)))........................................(((((((((((......................(((......))).(((.(((.(((..((.............)).)))))))))........((.((((((.((.((..(((....)))	0.267857	0	0.267857	0.267857	0	0.267857	0	0	0	-0.267857	0	-0.267857
273	.	.	.	.	.......(((((((((((.(((..(((.((..............)).)))...))).))))))))))).........................(((.(((....))).)))........................................(((((((((((......................(((......))).(((.(((.(((..((.............)).)))))))))........((.((((((.((.((..(((....))).	0.267857	0	0.267857	0.267857	0	0.267857	0.267857	0	0.267857	0	0	0
274	)	)	.	)	.......(((((((((((.(((..(((.((..............)).)))...))).))))))))))).........................(((.(((....))).)))........................................(((((((((((......................(((......))).(((.(((.(((..((.............)).)))))))))........((.((((((.((.((..(((....))).)	0.267857	-0.125	0.142857	0	0	0	0	0	0	0	0	0
275	)	)	.	)	.......(((((((((((.(((..(((.((..............)).)))...))).))))))))))).........................(((.(((....))).)))........................................(((((((((((......................(((......))).(((.(((.(((..((.............)).)))))))))........((.((((((.((.((..(((....))).))	0.434524	-0.416667	0.0178571	0	0	0	0	0	0	0	0	0
276	.	.	.	.	.......(((((((((((.(((..(((.((..............)).)))...))).))))))))))).........................(((.(((....))).)))........................................(((((((((((......................(((......))).(((.(((.(((..((.............)).)))))))))........((.((((((.((.((..(((....))).)).	0.559524	-0.416667	0.142857	0.559524	-0.416667	0.142857	0.559524	-0.416667	0.142857	0	0	0
277	.	(	.	(	.......(((((((((((.(((..(((.((..............)).)))...))).))))))))))).........................(((.(((....))).)))........................................(((((((((((......................(((......))).(((.(((.(((..((.............)).)))))))))........((.((((((.((.((..(((....))).)).(	0.583333	-0.416667	0.166667	0.583333	-0.416667	0.166667	0	0	0	-0.583333	0.416667	-0.166667
278	.	(	.	(	.......(((((((((((.(((..(((.((..............)).)))...))).))))))))))).........................(((.(((....))).)))........................................(((((((((((......................(((......))).(((.(((.(((..((.............)).)))))))))........((.((((((.((.((..(((....))).)).((	0.583333	-0.416667	0.166667	0.583333	-0.416667	0.166667	0	0	0	-0.583333	0.416667	-0.166667
279	.	(	.	(	.......(((((((((((.(((..(((.((..............)).)))...))).))))))))))).........................(((.(((....))).)))........................................(((((((((((......................(((......))).(((.(((.(((..((.............)).)))))))))........((.((((((.((.((..(((....))).)).(((	0.583333	-0.416667	0.166667	0.583333	-0.416667	0.166667	0	0	0	-0.583333	0.416667	-0.166667
280	.	.	.	.	.......(((((((((((.(((..(((.((..............)).)))...))).))))))))))).........................(((.(((....))).)))........................................(((((((((((......................(((......))).(((.(((.(((..((.............)).)))))))))........((.((((((.((.((..(((....))).)).(((.	0.583333	-0.416667	0.166667	0.583333	-0.416667	0.166667	0.583333	-0.416667	0.166667	0	0	0
281	.	(	.	(	.......(((((((((((.(((..(((.((..............)).)))...))).))))))))))).........................(((.(((....))).)))........................................(((((((((((......................(((......))).(((.(((.(((..((.............)).)))))))))........((.((((((.((.((..(((....))).)).(((.(	0.291667	-0.25	0.0416667	0.291667	-0.25	0.0416667	0	0	0	-0.291667	0.25	-0.0416667
282	.	(	.	(	.......(((((((((((.(((..(((.((..............)).)))...))).))))))))))).........................(((.(((....))).)))........................................(((((((((((......................(((......))).(((.(((.(((..((.............)).)))))))))........((.((((((.((.((..(((....))).)).(((.((	0.291667	-0.25	0.0416667	0.291667	-0.25	0.0416667	0	0	0	-0.291667	0.25	-0.0416667
283	(	(	.	(	.......(((((((((((.(((..(((.((..............)).)))...))).))))))))))).........................(((.(((....))).)))........................................(((((((((((......................(((......))).(((.(((.(((..((.............)).)))))))))........((.((((((.((.((..(((....))).)).(((.(((	0.25	-0.25	0	0	0	0	0	0	0	0	0	0
284	(	(	.	(	.......(((((((((((.(((..(((.((..............)).)))...))).))))))))))).........................(((.(((....))).)))........................................(((((((((((......................(((......))).(((.(((.(((..((.............)).)))))))))........((.((((((.((.((..(((....))).)).(((.((((	0.125	-0.375	-0.25	0	0	0	0	0	0	0	0	0
285	(	(	.	(	.......(((((((((((.(((..(((.((..............)).)))...))).))))))))))).........................(((.(((....))).)))........................................(((((((((((......................(((......))).(((.(((.(((..((.............)).)))))))))........((.((((((.((.((..(((....))).)).(((.(((((	0.434524	-0.375	0.0595238	0	0	0	0	0	0	0	0	0
286	.	.	.	.	.......(((((((((((.(((..(((.((..............)).)))...))).))))))))))).........................(((.(((....))).)))........................................(((((((((((......................(((......))).(((.(((.(((..((.............)).)))))))))........((.((((((.((.((..(((....))).)).(((.(((((.	0.744048	-0.375	0.369048	0.744048	-0.375	0.369048	0.744048	-0.375	0.369048	0	0	0
287	.	.	.	.	.......(((((((((((.(((..(((.((..............)).)))...))).))))))))))).........................(((.(((....))).)))........................................(((((((((((......................(((......))).(((.(((.(((..((.............)).)))))))))........((.((((((.((.((..(((....))).)).(((.(((((..	0.886905	-0.375	0.511905	0.886905	-0.375	0.511905	0.886905	-0.375	0.511905	0	0	0
288	.	.	.	.	.......(((((((((((.(((..(((.((..............)).)))...))).))))))))))).........................(((.(((....))).)))........................................(((((((((((......................(((......))).(((.(((.(((..((.............)).)))))))))........((.((((((.((.((..(((....))).)).(((.(((((...	1.05357	-0.5	0.553571	1.05357	-0.5	0.553571	1.05357	-0.5	0.553571	0	0	0
289	.	.	.	.	.......(((((((((((.(((..(((.((..............)).)))...))).))))))))))).........................(((.(((....))).)))........................................(((((((((((......................(((......))).(((.(((.(((..((.............)).)))))))))........((.((((((.((.((..(((....))).)).(((.(((((....	1.05357	-0.833333	0.220238	1.05357	-0.833333	0.220238	1.05357	-0.833333	0.220238	0	0	0
290	.	.	.	.	.......(((((((((((.(((..(((.((..............)).)))...))).))))))))))).........................(((.(((....))).)))........................................(((((((((((......................(((......))).(((.(((.(((..((.............)).)))))))))........((.((((((.((.((..(((....))).)).(((.(((((.....	1.22024	-0.708333	0.511905	1.22024	-0.708333	0.511905	1.22024	-0.708333	0.511905	0	0	0
291	.	.	.	.	.......(((((((((((.(((..(((.((..............)).)))...))).))))))))))).........................(((.(((....))).)))........................................(((((((((((......................(((......))).(((.(((.(((..((.............)).)))))))))........((.((((((.((.((..(((....))).)).(((.(((((......	0.928571	-0.75	0.178571	0.928571	-0.75	0.178571	0.928571	-0.75	0.178571	0	0	0
292	.	.	.	.	.......(((((((((((.(((..(((.((..............)).)))...))).))))))))))).........................(((.(((....))).)))........................................(((((((((((......................(((......))).(((.(((.(((..((.............)).)))))))))........((.((((((.((.((..(((....))).)).(((.(((((.......	0.619048	-0.75	-0.130952	0.619048	-0.75	-0.130952	0.619048	-0.75	-0.130952	0	0	0
293	.	.	.	.	.......(((((((((((.(((..(((.((..............)).)))...))).))))))))))).........................(((.(((....))).)))........................................(((((((((((......................(((......))).(((.(((.(((..((.............)).)))))))))........((.((((((.((.((..(((....))).)).(((.(((((........	0.47619	-0.75	-0.27381	0.47619	-0.75	-0.27381	0.47619	-0.75	-0.27381	0	0	0
294	.	.	.	.	.......(((((((((((.(((..(((.((..............)).)))...))).))))))))))).........................(((.(((....))).)))........................................(((((((((((......................(((......))).(((.(((.(((..((.............)).)))))))))........((.((((((.((.((..(((....))).)).(((.(((((.........	0.166667	-0.75	-0.583333	0.166667	-0.75	-0.583333	0.166667	-0.75	-0.583333	0	0	0
295	.	.	.	.	.......(((((((((((.(((..(((.((..............)).)))...))).))))))))))).........................(((.(((....))).)))........................................(((((((((((......................(((......))).(((.(((.(((..((.............)).)))))))))........((.((((((.((.((..(((....))).)).(((.(((((..........	0.333333	-0.416667	-0.0833333	0.333333	-0.416667	-0.0833333	0.333333	-0.416667	-0.0833333	0	0	0
296	.	.	.	.	.......(((((((((((.(((..(((.((..............)).)))...))).))))))))))).........................(((.(((....))).)))........................................(((((((((((......................(((......))).(((.(((.(((..((.............)).)))))))))........((.((((((.((.((..(((....))).)).(((.(((((...........	0.5	-0.416667	0.0833333	0.5	-0.416667	0.0833333	0.5	-0.416667	0.0833333	0	0	0
297	.	.	.	.	.......(((((((((((.(((..(((.((..............)).)))...))).))))))))))).........................(((.(((....))).)))........................................(((((((((((......................(((......))).(((.(((.(((..((.............)).)))))))))........((.((((((.((.((..(((....))).)).(((.(((((............	1.17619	-0.416667	0.759524	1.17619	-0.416667	0.759524	1.17619	-0.416667	0.759524	0	0	0
298	.	.	.	.	.......(((((((((((.(((..(((.((..............)).)))...))).))))))))))).........................(((.(((....))).)))........................................(((((((((((......................(((......))).(((.(((.(((..((.............)).)))))))))........((.((((((.((.((..(((....))).)).(((.(((((.............	1.17619	-0.559524	0.616667	1.17619	-0.559524	0.616667	1.17619	-0.559524	0.616667	0	0	0
299	)	)	.	)	.......(((((((((((.(((..(((.((..............)).)))...))).))))))))))).........................(((.(((....))).)))........................................(((((((((((......................(((......))).(((.(((.(((..((.............)).)))))))))........((.((((((.((.((..(((....))).)).(((.(((((.............)	1.34286	-0.892857	0.45	0	0	0	0	0	0	0	0	0
300	)	)	.	)	.......(((((((((((.(((..(((.((..............)).)))...))).))))))))))).........................(((.(((....))).)))........................................(((((((((((......................(((......))).(((.(((.(((..((.............)).)))))))))........((.((((((.((.((..(((....))).)).(((.(((((.............))	1.34286	-0.767857	0.575	0	0	0	0	0	0	0	0	0
301	)	)	.	)	.......(((((((((((.(((..(((.((..............)).)))...))).))))))))))).........................(((.(((....))).)))........................................(((((((((((......................(((......))).(((.(((.(((..((.............)).)))))))))........((.((((((.((.((..(((....))).)).(((.(((((.............)))	1.34286	-0.934524	0.408333	0	0	0	0	0	0	0	0	0
302	.	)	.	)	.......(((((((((((.(((..(((.((..............)).)))...))).))))))))))).........................(((.(((....))).)))........................................(((((((((((......................(((......))).(((.(((.(((..((.............)).)))))))))........((.((((((.((.((..(((....))).)).(((.(((((.............))))	0.809524	-0.934524	-0.125	0.809524	-0.934524	-0.125	0	0	0	-0.809524	0.934524	0.125
303	.	)	.	)	.......(((((((((((.(((..(((.((..............)).)))...))).))))))))))).........................(((.(((....))).)))........................................(((((((((((......................(((......))).(((.(((.(((..((.............)).)))))))))........((.((((((.((.((..(((....))).)).(((.(((((.............)))))	0.767857	-0.767857	5.32907e-15	0.767857	-0.767857	5.32907e-15	0	0	0	-0.767857	0.767857	-5.32907e-15
304	.	.	.	.	.......(((((((((((.(((..(((.((..............)).)))...))).))))))))))).........................(((.(((....))).)))........................................(((((((((((......................(((......))).(((.(((.(((..((.............)).)))))))))........((.((((((.((.((..(((....))).)).(((.(((((.............))))).	0.791667	-0.767857	0.0238095	0.791667	-0.767857	0.0238095	0.791667	-0.767857	0.0238095	0	0	0
305	.	.	.	.	.......(((((((((((.(((..(((.((..............)).)))...))).))))))))))).........................(((.(((....))).)))........................................(((((((((((......................(((......))).(((.(((.(((..((.............)).)))))))))........((.((((((.((.((..(((....))).)).(((.(((((.............)))))..	0.791667	-0.291667	0.5	0.791667	-0.291667	0.5	0.791667	-0.291667	0.5	0	0	0
306	.	)	.	)	.......(((((((((((.(((..(((.((..............)).)))...))).))))))))))).........................(((.(((....))).)))........................................(((((((((((......................(((......))).(((.(((.(((..((.............)).)))))))))........((.((((((.((.((..(((....))).)).(((.(((((.............)))))..)	0.791667	-0.291667	0.5	0.791667	-0.291667	0.5	0	0	0	-0.791667	0.291667	-0.5
307	.	)	.	)	.......(((((((((((.(((..(((.((..............)).)))...))).))))))))))).........................(((.(((....))).)))........................................(((((((((((......................(((......))).(((.(((.(((..((.............)).)))))))))........((.((((((.((.((..(((....))).)).(((.(((((.............)))))..))	0.625	-0.125	0.5	0.625	-0.125	0.5	0	0	0	-0.625	0.125	-0.5
308	.	)	.	)	.......(((((((((((.(((..(((.((..............)).)))...))).))))))))))).........................(((.(((....))).)))........................................(((((((((((......................(((......))).(((.(((.(((..((.............)).)))))))))........((.((((((.((.((..(((....))).)).(((.(((((.............)))))..)))	0.625	-0.125	0.5	0.625	-0.125	0.5	0	0	0	-0.625	0.125	-0.5
309	.	.	.	.	.......(((((((((((.(((..(((.((..............)).)))...))).))))))))))).........................(((.(((....))).)))........................................(((((((((((......................(((......))).(((.(((.(((..((.............)).)))))))))........((.((((((.((.((..(((....))).)).(((.(((((.............)))))..))).	0.625	-0.125	0.5	0.625	-0.125	0.5	0.625	-0.125	0.5	0	0	0
310	.	.	.	.	.......(((((((((((.(((..(((.((..............)).)))...))).))))))))))).........................(((.(((....))).)))........................................(((((((((((......................(((......))).(((.(((.(((..((.............)).)))))))))........((.((((((.((.((..(((....))).)).(((.(((((.............)))))..)))..	0.625	-0.125	0.5	0.625	-0.125	0.5	0.625	-0.125	0.5	0	0	0
311	.	.	.	.	.......(((((((((((.(((..(((.((..............)).)))...))).))))))))))).........................(((.(((....))).)))........................................(((((((((((......................(((......))).(((.(((.(((..((.............)).)))))))))........((.((((((.((.((..(((....))).)).(((.(((((.............)))))..)))...	0.333333	-0.25	0.0833333	0.333333	-0.25	0.0833333	0.333333	-0.25	0.0833333	0	0	0
312	.	.	.	.	.......(((((((((((.(((..(((.((..............)).)))...))).))))))))))).........................(((.(((....))).)))........................................(((((((((((......................(((......))).(((.(((.(((..((.............)).)))))))))........((.((((((.((.((..(((....))).)).(((.(((((.............)))))..)))....	0.333333	-0.125	0.208333	0.333333	-0.125	0.208333	0.333333	-0.125	0.208333	0	0	0
313	.	.	.	.	.......(((((((((((.(((..(((.((..............)).)))...))).))))))))))).........................(((.(((....))).)))........................................(((((((((((......................(((......))).(((.(((.(((..((.............)).)))))))))........((.((((((.((.((..(((....))).)).(((.(((((.............)))))..))).....	0.333333	-0.125	0.208333	0.333333	-0.125	0.208333	0.333333	-0.125	0.208333	0	0	0
314	.	.	.	.	.......(((((((((((.(((..(((.((..............)).)))...))).))))))))))).........................(((.(((....))).)))........................................(((((((((((......................(((......))).(((.(((.(((..((.............)).)))))))))........((.((((((.((.((..(((....))).)).(((.(((((.............)))))..)))......	0.333333	-0.291667	0.0416667	0.333333	-0.291667	0.0416667	0.333333	-0.291667	0.0416667	0	0	0
315	.	.	.	.	.......(((((((((((.(((..(((.((..............)).)))...))).))))))))))).........................(((.(((....))).)))........................................(((((((((((......................(((......))).(((.(((.(((..((.............)).)))))))))........((.((((((.((.((..(((....))).)).(((.(((((.............)))))..))).......	0.166667	-0.291667	-0.125	0.166667	-0.291667	-0.125	0.166667	-0.291667	-0.125	0	0	0
316	.	)	.	)	.......(((((((((((.(((..(((.((..............)).)))...))).))))))))))).........................(((.(((....))).)))........................................(((((((((((......................(((......))).(((.(((.(((..((.............)).)))))))))........((.((((((.((.((..(((....))).)).(((.(((((.............)))))..))).......)	0	-0.434524	-0.434524	0	-0.434524	-0.434524	0	0	0	0	0.434524	0.434524
317	.	)	.	)	.......(((((((((((.(((..(((.((..............)).)))...))).))))))))))).........................(((.(((....))).)))........................................(((((((((((......................(((......))).(((.(((.(((..((.............)).)))))))))........((.((((((.((.((..(((....))).)).(((.(((((.............)))))..))).......))	0	-0.434524	-0.434524	0	-0.434524	-0.434524	0	0	0	0	0.434524	0.434524
318	.	)	.	)	.......(((((((((((.(((..(((.((..............)).)))...))).))))))))))).........................(((.(((....))).)))........................................(((((((((((......................(((......))).(((.(((.(((..((.............)).)))))))))........((.((((((.((.((..(((....))).)).(((.(((((.............)))))..))).......)))	0	-0.434524	-0.434524	0	-0.434524	-0.434524	0	0	0	0	0.434524	0.434524
319	.	)	.	)	.......(((((((((((.(((..(((.((..............)).)))...))).))))))))))).........................(((.(((....))).)))........................................(((((((((((......................(((......))).(((.(((.(((..((.............)).)))))))))........((.((((((.((.((..(((....))).)).(((.(((((.............)))))..))).......))))	0	-0.309524	-0.309524	0	-0.309524	-0.309524	0	0	0	0	0.309524	0.309524
320	.	)	.	)	.......(((((((((((.(((..(((.((..............)).)))...))).))))))))))).........................(((.(((....))).)))........................................(((((((((((......................(((......))).(((.(((.(((..((.............)).)))))))))........((.((((((.((.((..(((....))).)).(((.(((((.............)))))..))).......)))))	0	-0.142857	-0.142857	0	-0.142857	-0.142857	0	0	0	0	0.142857	0.142857
321	.	)	.	)	.......(((((((((((.(((..(((.((..............)).)))...))).))))))))))).........................(((.(((....))).)))........................................(((((((((((......................(((......))).(((.(((.(((..((.............)).)))))))))........((.((((((.((.((..(((....))).)).(((.(((((.............)))))..))).......))))))	0.142857	-0.142857	0	0.142857	-0.142857	0	0	0	0	-0.142857	0.142857	0
322	.	)	.	)	.......(((((((((((.(((..(((.((..............)).)))...))).))))))))))).........................(((.(((....))).)))........................................(((((((((((......................(((......))).(((.(((.(((..((.............)).)))))))))........((.((((((.((.((..(((....))).)).(((.(((((.............)))))..))).......)))))))	0.309524	-0.142857	0.166667	0.309524	-0.142857	0.166667	0	0	0	-0.309524	0.142857	-0.166667
323	.	)	.	)	.......(((((((((((.(((..(((.((..............)).)))...))).))))))))))).........................(((.(((....))).)))........................................(((((((((((......................(((......))).(((.(((.(((..((.............)).)))))))))........((.((((((.((.((..(((....))).)).(((.(((((.............)))))..))).......))))))))	0.309524	0	0.309524	0.309524	0	0.309524	0	0	0	-0.309524	0	-0.309524
324	(	.	.	.	.......(((((((((((.(((..(((.((..............)).)))...))).))))))))))).........................(((.(((....))).)))........................................(((((((((((......................(((......))).(((.(((.(((..((.............)).)))))))))........((.((((((.((.((..(((....))).)).(((.(((((.............)))))..))).......)))))))).	0.309524	0	0.309524	0	0	0	0.309524	0	0.309524	0.309524	0	0.309524
325	(	)	.	)	.......(((((((((((.(((..(((.((..............)).)))...))).))))))))))).........................(((.(((....))).)))........................................(((((((((((......................(((......))).(((.(((.(((..((.............)).)))))))))........((.((((((.((.((..(((....))).)).(((.(((((.............)))))..))).......)))))))).)	0.47619	0	0.47619	0	0	0	0	0	0	0	0	0
326	(	)	.	)	.......(((((((((((.(((..(((.((..............)).)))...))).))))))))))).........................(((.(((....))).)))........................................(((((((((((......................(((......))).(((.(((.(((..((.............)).)))))))))........((.((((((.((.((..(((....))).)).(((.(((((.............)))))..))).......)))))))).))	0.97619	-0.125	0.85119	0	0	0	0	0	0	0	0	0
327	(	.	.	.	.......(((((((((((.(((..(((.((..............)).)))...))).))))))))))).........................(((.(((....))).)))........................................(((((((((((......................(((......))).(((.(((.(((..((.............)).)))))))))........((.((((((.((.((..(((....))).)).(((.(((((.............)))))..))).......)))))))).)).	1.17619	-0.291667	0.884524	0	0	0	1.17619	-0.291667	0.884524	1.17619	-0.291667	0.884524
328	(	.	.	.	.......(((((((((((.(((..(((.((..............)).)))...))).))))))))))).........................(((.(((....))).)))........................................(((((((((((......................(((......))).(((.(((.(((..((.............)).)))))))))........((.((((((.((.((..(((....))).)).(((.(((((.............)))))..))).......)))))))).))..	0.866667	-0.291667	0.575	0	0	0	0.866667	-0.291667	0.575	0.866667	-0.291667	0.575
329	(	.	.	.	.......(((((((((((.(((..(((.((..............)).)))...))).))))))))))).........................(((.(((....))).)))........................................(((((((((((......................(((......))).(((.(((.(((..((.............)).)))))))))........((.((((((.((.((..(((....))).)).(((.(((((.............)))))..))).......)))))))).))...	0.866667	-0.291667	0.575	0	0	0	0.866667	-0.291667	0.575	0.866667	-0.291667	0.575
330	(	.	.	.	.......(((((((((((.(((..(((.((..............)).)))...))).))))))))))).........................(((.(((....))).)))........................................(((((((((((......................(((......))).(((.(((.(((..((.............)).)))))))))........((.((((((.((.((..(((....))).)).(((.(((((.............)))))..))).......)))))))).))....	0.866667	-0.416667	0.45	0	0	0	0.866667	-0.416667	0.45	0.866667	-0.416667	0.45
331	(	.	.	.	.......(((((((((((.(((..(((.((..............)).)))...))).))))))))))).........................(((.(((....))).)))........................................(((((((((((......................(((......))).(((.(((.(((..((.............)).)))))))))........((.((((((.((.((..(((....))).)).(((.(((((.............)))))..))).......)))))))).)).....	0.825	-0.416667	0.408333	0	0	0	0.825	-0.416667	0.408333	0.825	-0.416667	0.408333
332	.	.	.	.	.......(((((((((((.(((..(((.((..............)).)))...))).))))))))))).........................(((.(((....))).)))........................................(((((((((((......................(((......))).(((.(((.(((..((.............)).)))))))))........((.((((((.((.((..(((....))).)).(((.(((((.............)))))..))).......)))))))).))......	0.125	-0.541667	-0.416667	0.125	-0.541667	-0.416667	0.125	-0.541667	-0.416667	0	0	0
333	(	.	.	.	.......(((((((((((.(((..(((.((..............)).)))...))).))))))))))).........................(((.(((....))).)))........................................(((((((((((......................(((......))).(((.(((.(((..((.............)).)))))))))........((.((((((.((.((..(((....))).)).(((.(((((.............)))))..))).......)))))))).)).......	0.434524	-0.5	-0.0654762	0	0	0	0.434524	-0.5	-0.0654762	0.434524	-0.5	-0.0654762
334	(	.	.	.	.......(((((((((((.(((..(((.((..............)).)))...))).))))))))))).........................(((.(((....))).)))........................................(((((((((((......................(((......))).(((.(((.(((..((.............)).)))))))))........((.((((((.((.((..(((....))).)).(((.(((((.............)))))..))).......)))))))).))........	0.744048	-0.5	0.244048	0	0	0	0.744048	-0.5	0.244048	0.744048	-0.5	0.244048
335	(	.	.	.	.......(((((((((((.(((..(((.((..............)).)))...))).))))))))))).........................(((.(((....))).)))........................................(((((((((((......................(((......))).(((.(((.(((..((.............)).)))))))))........((.((((((.((.((..(((....))).)).(((.(((((.............)))))..))).......)))))))).)).........	1.05357	-0.5	0.553571	0	0	0	1.05357	-0.5	0.553571	1.05357	-0.5	0.553571
336	(	.	.	.	.......(((((((((((.(((..(((.((..............)).)))...))).))))))))))).........................(((.(((....))).)))........................................(((((((((((......................(((......))).(((.(((.(((..((.............)).)))))))))........((.((((((.((.((..(((....))).)).(((.(((((.............)))))..))).......)))))))).))..........	1.50595	-0.5	1.00595	0	0	0	1.50595	-0.5	1.00595	1.50595	-0.5	1.00595
337	(	.	.	.	.......(((((((((((.(((..(((.((..............)).)))...))).))))))))))).........................(((.(((....))).)))........................................(((((((((((......................(((......))).(((.(((.(((..((.............)).)))))))))........((.((((((.((.((..(((....))).)).(((.(((((.............)))))..))).......)))))))).))...........	1.50595	-0.5	1.00595	0	0	0	1.50595	-0.5	1.00595	1.50595	-0.5	1.00595
338	(	.	x	|	.......(((((((((((.(((..(((.((..............)).)))...))).))))))))))).........................(((.(((....))).)))........................................(((((((((((......................(((......))).(((.(((.(((..((.............)).)))))))))........((.((((((.((.((..(((....))).)).(((.(((((.............)))))..))).......)))))))).))...........|	1.67262	-0.375	1.29762	0	0	0	0	0	0	0	0	0
339	(	.	x	|	.......(((((((((((.(((..(((.((..............)).)))...))).))))))))))).........................(((.(((....))).)))........................................(((((((((((......................(((......))).(((.(((.(((..((.............)).)))))))))........((.((((((.((.((..(((....))).)).(((.(((((.............)))))..))).......)))))))).))...........||	1.38095	-0.375	1.00595	0	0	0	0	0	0	0	0	0
340	(	.	x	|	.......(((((((((((.(((..(((.((..............)).)))...))).))))))))))).........................(((.(((....))).)))........................................(((((((((((......................(((......))).(((.(((.(((..((.............)).)))))))))........((.((((((.((.((..(((....))).)).(((.(((((.............)))))..))).......)))))))).))...........|||	1.07143	-0.25	0.821429	0	0	0	0	0	0	0	0	0
341	(	.	x	|	.......(((((((((((.(((..(((.((..............)).)))...))).))))))))))).........................(((.(((....))).)))........................................(((((((((((......................(((......))).(((.(((.(((..((.............)).)))))))))........((.((((((.((.((..(((....))).)).(((.(((((.............)))))..))).......)))))))).))...........||||	0.886905	-0.125	0.761905	0	0	0	0	0	0	0	0	0
342	(	.	x	|	.......(((((((((((.(((..(((.((..............)).)))...))).))))))))))).........................(((.(((....))).)))........................................(((((((((((......................(((......))).(((.(((.(((..((.............)).)))))))))........((.((((((.((.((..(((....))).)).(((.(((((.............)))))..))).......)))))))).))...........|||||	0.577381	-0.125	0.452381	0	0	0	0	0	0	0	0	0
343	(	.	x	|	.......(((((((((((.(((..(((.((..............)).)))...))).))))))))))).........................(((.(((....))).)))........................................(((((((((((......................(((......))).(((.(((.(((..((.............)).)))))))))........((.((((((.((.((..(((....))).)).(((.(((((.............)))))..))).......)))))))).))...........||||||	0.577381	-0.125	0.452381	0	0	0	0	0	0	0	0	0
344	(	.	x	|	.......(((((((((((.(((..(((.((..............)).)))...))).))))))))))).........................(((.(((....))).)))........................................(((((((((((......................(((......))).(((.(((.(((..((.............)).)))))))))........((.((((((.((.((..(((....))).)).(((.(((((.............)))))..))).......)))))))).))...........|||||||	0.702381	-0.125	0.577381	0	0	0	0	0	0	0	0	0
345	(	.	x	|	.......(((((((((((.(((..(((.((..............)).)))...))).))))))))))).........................(((.(((....))).)))........................................(((((((((((......................(((......))).(((.(((.(((..((.............)).)))))))))........((.((((((.((.((..(((....))).)).(((.(((((.............)))))..))).......)))))))).))...........||||||||	1.16071	-0.125	1.03571	0	0	0	0	0	0	0	0	0
346	(	.	x	|	.......(((((((((((.(((..(((.((..............)).)))...))).))))))))))).........................(((.(((....))).)))........................................(((((((((((......................(((......))).(((.(((.(((..((.............)).)))))))))........((.((((((.((.((..(((....))).)).(((.(((((.............)))))..))).......)))))))).))...........|||||||||	1.90476	-0.125	1.77976	0	0	0	0	0	0	0	0	0
347	(	.	x	|	.......(((((((((((.(((..(((.((..............)).)))...))).))))))))))).........................(((.(((....))).)))........................................(((((((((((......................(((......))).(((.(((.(((..((.............)).)))))))))........((.((((((.((.((..(((....))).)).(((.(((((.............)))))..))).......)))))))).))...........||||||||||	2.3631	-0.267857	2.09524	0	0	0	0	0	0	0	0	0
348	.	.	x	|	.......(((((((((((.(((..(((.((..............)).)))...))).))))))))))).........................(((.(((....))).)))........................................(((((((((((......................(((......))).(((.(((.(((..((.............)).)))))))))........((.((((((.((.((..(((....))).)).(((.(((((.............)))))..))).......)))))))).))...........|||||||||||	2.9881	-0.535714	2.45238	2.9881	-0.535714	2.45238	0	0	0	-2.9881	0.535714	-2.45238
349	(	.	x	|	.......(((((((((((.(((..(((.((..............)).)))...))).))))))))))).........................(((.(((....))).)))........................................(((((((((((......................(((......))).(((.(((.(((..((.............)).)))))))))........((.((((((.((.((..(((....))).)).(((.(((((.............)))))..))).......)))))))).))...........||||||||||||	3.66429	-0.702381	2.9619	0	0	0	0	0	0	0	0	0
350	(	.	x	|	.......(((((((((((.(((..(((.((..............)).)))...))).))))))))))).........................(((.(((....))).)))........................................(((((((((((......................(((......))).(((.(((.(((..((.............)).)))))))))........((.((((((.((.((..(((....))).)).(((.(((((.............)))))..))).......)))))))).))...........|||||||||||||	3.67024	-0.720238	2.95	0	0	0	0	0	0	0	0	0
351	(	.	x	|	.......(((((((((((.(((..(((.((..............)).)))...))).))))))))))).........................(((.(((....))).)))........................................(((((((((((......................(((......))).(((.(((.(((..((.............)).)))))))))........((.((((((.((.((..(((....))).)).(((.(((((.............)))))..))).......)))))))).))...........||||||||||||||	3.8369	-0.886905	2.95	0	0	0	0	0	0	0	0	0
352	(	.	x	|	.......(((((((((((.(((..(((.((..............)).)))...))).))))))))))).........................(((.(((....))).)))........................................(((((((((((......................(((......))).(((.(((.(((..((.............)).)))))))))........((.((((((.((.((..(((....))).)).(((.(((((.............)))))..))).......)))))))).))...........|||||||||||||||	3.8369	-0.886905	2.95	0	0	0	0	0	0	0	0	0
353	(	.	x	|	.......(((((((((((.(((..(((.((..............)).)))...))).))))))))))).........................(((.(((....))).)))........................................(((((((((((......................(((......))).(((.(((.(((..((.............)).)))))))))........((.((((((.((.((..(((....))).)).(((.(((((.............)))))..))).......)))))))).))...........||||||||||||||||	3.09286	-1.02976	2.0631	0	0	0	0	0	0	0	0	0
354	(	.	x	|	.......(((((((((((.(((..(((.((..............)).)))...))).))))))))))).........................(((.(((....))).)))........................................(((((((((((......................(((......))).(((.(((.(((..((.............)).)))))))))........((.((((((.((.((..(((....))).)).(((.(((((.............)))))..))).......)))))))).))...........|||||||||||||||||	2.89286	-1.19643	1.69643	0	0	0	0	0	0	0	0	0
355	(	.	x	|	.......(((((((((((.(((..(((.((..............)).)))...))).))))))))))).........................(((.(((....))).)))........................................(((((((((((......................(((......))).(((.(((.(((..((.............)).)))))))))........((.((((((.((.((..(((....))).)).(((.(((((.............)))))..))).......)))))))).))...........||||||||||||||||||	2.76786	-1.05357	1.71429	0	0	0	0	0	0	0	0	0
356	.	.	x	|	.......(((((((((((.(((..(((.((..............)).)))...))).))))))))))).........................(((.(((....))).)))........................................(((((((((((......................(((......))).(((.(((.(((..((.............)).)))))))))........((.((((((.((.((..(((....))).)).(((.(((((.............)))))..))).......)))))))).))...........|||||||||||||||||||	2.33333	-0.928571	1.40476	2.33333	-0.928571	1.40476	0	0	0	-2.33333	0.928571	-1.40476
357	.	.	x	|	.......(((((((((((.(((..(((.((..............)).)))...))).))))))))))).........................(((.(((....))).)))........................................(((((((((((......................(((......))).(((.(((.(((..((.............)).)))))))))........((.((((((.((.((..(((....))).)).(((.(((((.............)))))..))).......)))))))).))...........||||||||||||||||||||	1.875	-0.886905	0.988095	1.875	-0.886905	0.988095	0	0	0	-1.875	0.886905	-0.988095
358	.	.	x	|	.......(((((((((((.(((..(((.((..............)).)))...))).))))))))))).........................(((.(((....))).)))........................................(((((((((((......................(((......))).(((.(((.(((..((.............)).)))))))))........((.((((((.((.((..(((....))).)).(((.(((((.............)))))..))).......)))))))).))...........|||||||||||||||||||||	1.72619	-1.05357	0.672619	1.72619	-1.05357	0.672619	0	0	0	-1.72619	1.05357	-0.672619
359	.	.	x	|	.......(((((((((((.(((..(((.((..............)).)))...))).))))))))))).........................(((.(((....))).)))........................................(((((((((((......................(((......))).(((.(((.(((..((.............)).)))))))))........((.((((((.((.((..(((....))).)).(((.(((((.............)))))..))).......)))))))).))...........||||||||||||||||||||||	1.72619	-1.19643	0.529762	1.72619	-1.19643	0.529762	0	0	0	-1.72619	1.19643	-0.529762
360	.	.	x	|	.......(((((((((((.(((..(((.((..............)).)))...))).))))))))))).........................(((.(((....))).)))........................................(((((((((((......................(((......))).(((.(((.(((..((.............)).)))))))))........((.((((((.((.((..(((....))).)).(((.(((((.............)))))..))).......)))))))).))...........|||||||||||||||||||||||	1.10119	-0.886905	0.214286	1.10119	-0.886905	0.214286	0	0	0	-1.10119	0.886905	-0.214286
361	.	.	x	|	.......(((((((((((.(((..(((.((..............)).)))...))).))))))))))).........................(((.(((....))).)))........................................(((((((((((......................(((......))).(((.(((.(((..((.............)).)))))))))........((.((((((.((.((..(((....))).)).(((.(((((.............)))))..))).......)))))))).))...........||||||||||||||||||||||||	0.767857	-0.577381	0.190476	0.767857	-0.577381	0.190476	0	0	0	-0.767857	0.577381	-0.190476
362	.	.	x	|	.......(((((((((((.(((..(((.((..............)).)))...))).))))))))))).........................(((.(((....))).)))........................................(((((((((((......................(((......))).(((.(((.(((..((.............)).)))))))))........((.((((((.((.((..(((....))).)).(((.(((((.............)))))..))).......)))))))).))...........|||||||||||||||||||||||||	0.642857	-0.744048	-0.10119	0.642857	-0.744048	-0.10119	0	0	0	-0.642857	0.744048	0.10119
363	.	.	.	.	.......(((((((((((.(((..(((.((..............)).)))...))).))))))))))).........................(((.(((....))).)))........................................(((((((((((......................(((......))).(((.(((.(((..((.............)).)))))))))........((.((((((.((.((..(((....))).)).(((.(((((.............)))))..))).......)))))))).))...........|||||||||||||||||||||||||.	0.47619	-0.910714	-0.434524	0.47619	-0.910714	-0.434524	0.47619	-0.910714	-0.434524	0	0	0
364	.	.	.	.	.......(((((((((((.(((..(((.((..............)).)))...))).))))))))))).........................(((.(((....))).)))........................................(((((((((((......................(((......))).(((.(((.(((..((.............)).)))))))))........((.((((((.((.((..(((....))).)).(((.(((((.............)))))..))).......)))))))).))...........|||||||||||||||||||||||||..	0.309524	-0.767857	-0.458333	0.309524	-0.767857	-0.458333	0.309524	-0.767857	-0.458333	0	0	0
365	.	.	.	.	.......(((((((((((.(((..(((.((..............)).)))...))).))))))))))).........................(((.(((....))).)))........................................(((((((((((......................(((......))).(((.(((.(((..((.............)).)))))))))........((.((((((.((.((..(((....))).)).(((.(((((.............)))))..))).......)))))))).))...........|||||||||||||||||||||||||...	0.291667	-0.642857	-0.35119	0.291667	-0.642857	-0.35119	0.291667	-0.642857	-0.35119	0	0	0
366	)	.	.	.	.......(((((((((((.(((..(((.((..............)).)))...))).))))))))))).........................(((.(((....))).)))........................................(((((((((((......................(((......))).(((.(((.(((..((.............)).)))))))))........((.((((((.((.((..(((....))).)).(((.(((((.............)))))..))).......)))))))).))...........|||||||||||||||||||||||||....	0.291667	-0.5	-0.208333	0	0	0	0.291667	-0.5	-0.208333	0.291667	-0.5	-0.208333
367	)	.	.	.	.......(((((((((((.(((..(((.((..............)).)))...))).))))))))))).........................(((.(((....))).)))........................................(((((((((((......................(((......))).(((.(((.(((..((.............)).)))))))))........((.((((((.((.((..(((....))).)).(((.(((((.............)))))..))).......)))))))).))...........|||||||||||||||||||||||||.....	0.291667	-0.791667	-0.5	0	0	0	0.291667	-0.791667	-0.5	0.291667	-0.791667	-0.5
368	)	.	.	.	.......(((((((((((.(((..(((.((..............)).)))...))).))))))))))).........................(((.(((....))).)))........................................(((((((((((......................(((......))).(((.(((.(((..((.............)).)))))))))........((.((((((.((.((..(((....))).)).(((.(((((.............)))))..))).......)))))))).))...........|||||||||||||||||||||||||......	0.125	-0.625	-0.5	0	0	0	0.125	-0.625	-0.5	0.125	-0.625	-0.5
369	)	.	.	.	.......(((((((((((.(((..(((.((..............)).)))...))).))))))))))).........................(((.(((....))).)))........................................(((((((((((......................(((......))).(((.(((.(((..((.............)).)))))))))........((.((((((.((.((..(((....))).)).(((.(((((.............)))))..))).......)))))))).))...........|||||||||||||||||||||||||.......	0.125	-0.458333	-0.333333	0	0	0	0.125	-0.458333	-0.333333	0.125	-0.458333	-0.333333
370	)	.	.	.	.......(((((((((((.(((..(((.((..............)).)))...))).))))))))))).........................(((.(((....))).)))........................................(((((((((((......................(((......))).(((.(((.(((..((.............)).)))))))))........((.((((((.((.((..(((....))).)).(((.(((((.............)))))..))).......)))))))).))...........|||||||||||||||||||||||||........	0.125	-0.291667	-0.166667	0	0	0	0.125	-0.291667	-0.166667	0.125	-0.291667	-0.166667
371	)	.	.	.	.......(((((((((((.(((..(((.((..............)).)))...))).))))))))))).........................(((.(((....))).)))........................................(((((((((((......................(((......))).(((.(((.(((..((.............)).)))))))))........((.((((((.((.((..(((....))).)).(((.(((((.............)))))..))).......)))))))).))...........|||||||||||||||||||||||||.........	0.125	-0.291667	-0.166667	0	0	0	0.125	-0.291667	-0.166667	0.125	-0.291667	-0.166667
372	)	.	.	.	.......(((((((((((.(((..(((.((..............)).)))...))).))))))))))).........................(((.(((....))).)))........................................(((((((((((......................(((......))).(((.(((.(((..((.............)).)))))))))........((.((((((.((.((..(((....))).)).(((.(((((.............)))))..))).......)))))))).))...........|||||||||||||||||||||||||..........	0.458333	-0.458333	-3.55271e-15	0	0	0	0.458333	-0.458333	-3.55271e-15	0.458333	-0.458333	-3.55271e-15
373	.	.	.	.	.......(((((((((((.(((..(((.((..............)).)))...))).))))))))))).........................(((.(((....))).)))........................................(((((((((((......................(((......))).(((.(((.(((..((.............)).)))))))))........((.((((((.((.((..(((....))).)).(((.(((((.............)))))..))).......)))))))).))...........|||||||||||||||||||||||||...........	0.866667	-0.458333	0.408333	0.866667	-0.458333	0.408333	0.866667	-0.458333	0.408333	0	0	0
374	)	.	.	.	.......(((((((((((.(((..(((.((..............)).)))...))).))))))))))).........................(((.(((....))).)))........................................(((((((((((......................(((......))).(((.(((.(((..((.............)).)))))))))........((.((((((.((.((..(((....))).)).(((.(((((.............)))))..))).......)))))))).))...........|||||||||||||||||||||||||............	1.2	-0.458333	0.741667	0	0	0	1.2	-0.458333	0.741667	1.2	-0.458333	0.741667
375	)	.	.	.	.......(((((((((((.(((..(((.((..............)).)))...))).))))))))))).........................(((.(((....))).)))........................................(((((((((((......................(((......))).(((.(((.(((..((.............)).)))))))))........((.((((((.((.((..(((....))).)).(((.(((((.............)))))..))).......)))))))).))...........|||||||||||||||||||||||||.............	1.7	-0.333333	1.36667	0	0	0	1.7	-0.333333	1.36667	1.7	-0.333333	1.36667
376	.	.	.	.	.......(((((((((((.(((..(((.((..............)).)))...))).))))))))))).........................(((.(((....))).)))........................................(((((((((((......................(((......))).(((.(((.(((..((.............)).)))))))))........((.((((((.((.((..(((....))).)).(((.(((((.............)))))..))).......)))))))).))...........|||||||||||||||||||||||||..............	2.06667	-0.458333	1.60833	2.06667	-0.458333	1.60833	2.06667	-0.458333	1.60833	0	0	0
377	.	.	.	.	.......(((((((((((.(((..(((.((..............)).)))...))).))))))))))).........................(((.(((....))).)))........................................(((((((((((......................(((......))).(((.(((.(((..((.............)).)))))))))........((.((((((.((.((..(((....))).)).(((.(((((.............)))))..))).......)))))))).))...........|||||||||||||||||||||||||...............	2.23333	-0.583333	1.65	2.23333	-0.583333	1.65	2.23333	-0.583333	1.65	0	0	0
378	.	.	.	.	.......(((((((((((.(((..(((.((..............)).)))...))).))))))))))).........................(((.(((....))).)))........................................(((((((((((......................(((......))).(((.(((.(((..((.............)).)))))))))........((.((((((.((.((..(((....))).)).(((.(((((.............)))))..))).......)))))))).))...........|||||||||||||||||||||||||................	1.7	-0.416667	1.28333	1.7	-0.416667	1.28333	1.7	-0.416667	1.28333	0	0	0
379	.	.	.	.	.......(((((((((((.(((..(((.((..............)).)))...))).))))))))))).........................(((.(((....))).)))........................................(((((((((((......................(((......))).(((.(((.(((..((.............)).)))))))))........((.((((((.((.((..(((....))).)).(((.(((((.............)))))..))).......)))))))).))...........|||||||||||||||||||||||||.................	1.36667	-0.25	1.11667	1.36667	-0.25	1.11667	1.36667	-0.25	1.11667	0	0	0
380	.	.	.	.	.......(((((((((((.(((..(((.((..............)).)))...))).))))))))))).........................(((.(((....))).)))........................................(((((((((((......................(((......))).(((.(((.(((..((.............)).)))))))))........((.((((((.((.((..(((....))).)).(((.(((((.............)))))..))).......)))))))).))...........|||||||||||||||||||||||||..................	1.03333	-0.25	0.783333	1.03333	-0.25	0.783333	1.03333	-0.25	0.783333	0	0	0
381	(	.	.	.	.......(((((((((((.(((..(((.((..............)).)))...))).))))))))))).........................(((.(((....))).)))........................................(((((((((((......................(((......))).(((.(((.(((..((.............)).)))))))))........((.((((((.((.((..(((....))).)).(((.(((((.............)))))..))).......)))))))).))...........|||||||||||||||||||||||||...................	0.333333	-0.25	0.0833333	0	0	0	0.333333	-0.25	0.0833333	0.333333	-0.25	0.0833333
382	(	.	.	.	.......(((((((((((.(((..(((.((..............)).)))...))).))))))))))).........................(((.(((....))).)))........................................(((((((((((......................(((......))).(((.(((.(((..((.............)).)))))))))........((.((((((.((.((..(((....))).)).(((.(((((.............)))))..))).......)))))))).))...........|||||||||||||||||||||||||....................	0.166667	-0.416667	-0.25	0	0	0	0.166667	-0.416667	-0.25	0.166667	-0.416667	-0.25
383	(	.	.	.	.......(((((((((((.(((..(((.((..............)).)))...))).))))))))))).........................(((.(((....))).)))........................................(((((((((((......................(((......))).(((.(((.(((..((.............)).)))))))))........((.((((((.((.((..(((....))).)).(((.(((((.............)))))..))).......)))))))).))...........|||||||||||||||||||||||||.....................	0	-0.875	-0.875	0	0	0	0	-0.875	-0.875	0	-0.875	-0.875
384	.	.	.	.	.......(((((((((((.(((..(((.((..............)).)))...))).))))))))))).........................(((.(((....))).)))........................................(((((((((((......................(((......))).(((.(((.(((..((.............)).)))))))))........((.((((((.((.((..(((....))).)).(((.(((((.............)))))..))).......)))))))).))...........|||||||||||||||||||||||||......................	0	-0.75	-0.75	0	-0.75	-0.75	0	-0.75	-0.75	0	0	0
385	.	.	.	.	.......(((((((((((.(((..(((.((..............)).)))...))).))))))))))).........................(((.(((....))).)))........................................(((((((((((......................(((......))).(((.(((.(((..((.............)).)))))))))........((.((((((.((.((..(((....))).)).(((.(((((.............)))))..))).......)))))))).))...........|||||||||||||||||||||||||.......................	0	-0.791667	-0.791667	0	-0.791667	-0.791667	0	-0.791667	-0.791667	0	0	0
386	(	.	.	.	.......(((((((((((.(((..(((.((..............)).)))...))).))))))))))).........................(((.(((....))).)))........................................(((((((((((......................(((......))).(((.(((.(((..((.............)).)))))))))........((.((((((.((.((..(((....))).)).(((.(((((.............)))))..))).......)))))))).))...........|||||||||||||||||||||||||........................	0.142857	-1.10119	-0.958333	0	0	0	0.142857	-1.10119	-0.958333	0.142857	-1.10119	-0.958333
387	(	.	.	.	.......(((((((((((.(((..(((.((..............)).)))...))).))))))))))).........................(((.(((....))).)))........................................(((((((((((......................(((......))).(((.(((.(((..((.............)).)))))))))........((.((((((.((.((..(((....))).)).(((.(((((.............)))))..))).......)))))))).))...........|||||||||||||||||||||||||.........................	0.142857	-1.41071	-1.26786	0	0	0	0.142857	-1.41071	-1.26786	0.142857	-1.41071	-1.26786
388	(	.	.	.	.......(((((((((((.(((..(((.((..............)).)))...))).))))))))))).........................(((.(((....))).)))........................................(((((((((((......................(((......))).(((.(((.(((..((.............)).)))))))))........((.((((((.((.((..(((....))).)).(((.(((((.............)))))..))).......)))))))).))...........|||||||||||||||||||||||||..........................	0.142857	-1.55357	-1.41071	0	0	0	0.142857	-1.55357	-1.41071	0.142857	-1.55357	-1.41071
389	(	.	.	.	.......(((((((((((.(((..(((.((..............)).)))...))).))))))))))).........................(((.(((....))).)))........................................(((((((((((......................(((......))).(((.(((.(((..((.............)).)))))))))........((.((((((.((.((..(((....))).)).(((.(((((.............)))))..))).......)))))))).))...........|||||||||||||||||||||||||...........................	0.142857	-1.3869	-1.24405	0	0	0	0.142857	-1.3869	-1.24405	0.142857	-1.3869	-1.24405
390	(	.	.	.	.......(((((((((((.(((..(((.((..............)).)))...))).))))))))))).........................(((.(((....))).)))........................................(((((((((((......................(((......))).(((.(((.(((..((.............)).)))))))))........((.((((((.((.((..(((....))).)).(((.(((((.............)))))..))).......)))))))).))...........|||||||||||||||||||||||||............................	0.309524	-1.55357	-1.24405	0	0	0	0.309524	-1.55357	-1.24405	0.309524	-1.55357	-1.24405
391	.	)	.	)	.......(((((((((((.(((..(((.((..............)).)))...))).))))))))))).........................(((.(((....))).)))........................................(((((((((((......................(((......))).(((.(((.(((..((.............)).)))))))))........((.((((((.((.((..(((....))).)).(((.(((((.............)))))..))).......)))))))).))...........|||||||||||||||||||||||||............................)	0.47619	-1.42857	-0.952381	0.47619	-1.42857	-0.952381	0	0	0	-0.47619	1.42857	0.952381
392	(	)	.	)	.......(((((((((((.(((..(((.((..............)).)))...))).))))))))))).........................(((.(((....))).)))........................................(((((((((((......................(((......))).(((.(((.(((..((.............)).)))))))))........((.((((((.((.((..(((....))).)).(((.(((((.............)))))..))).......)))))))).))...........|||||||||||||||||||||||||............................))	0.47619	-1.2619	-0.785714	0	0	0	0	0	0	0	0	0
393	(	)	.	)	.......(((((((((((.(((..(((.((..............)).)))...))).))))))))))).........................(((.(((....))).)))........................................(((((((((((......................(((......))).(((.(((.(((..((.............)).)))))))))........((.((((((.((.((..(((....))).)).(((.(((((.............)))))..))).......)))))))).))...........|||||||||||||||||||||||||............................)))	0.5	-0.952381	-0.452381	0	0	0	0	0	0	0	0	0
394	.	)	.	)	.......(((((((((((.(((..(((.((..............)).)))...))).))))))))))).........................(((.(((....))).)))........................................(((((((((((......................(((......))).(((.(((.(((..((.............)).)))))))))........((.((((((.((.((..(((....))).)).(((.(((((.............)))))..))).......)))))))).))...........|||||||||||||||||||||||||............................))))	0.5	-0.642857	-0.142857	0.5	-0.642857	-0.142857	0	0	0	-0.5	0.642857	0.142857
395	.	.	.	.	.......(((((((((((.(((..(((.((..............)).)))...))).))))))))))).........................(((.(((....))).)))........................................(((((((((((......................(((......))).(((.(((.(((..((.............)).)))))))))........((.((((((.((.((..(((....))).)).(((.(((((.............)))))..))).......)))))))).))...........|||||||||||||||||||||||||............................)))).	0.5	-0.333333	0.166667	0.5	-0.333333	0.166667	0.5	-0.333333	0.166667	0	0	0
396	.	.	.	.	.......(((((((((((.(((..(((.((..............)).)))...))).))))))))))).........................(((.(((....))).)))........................................(((((((((((......................(((......))).(((.(((.(((..((.............)).)))))))))........((.((((((.((.((..(((....))).)).(((.(((((.............)))))..))).......)))))))).))...........|||||||||||||||||||||||||............................))))..	0.333333	-0.166667	0.166667	0.333333	-0.166667	0.166667	0.333333	-0.166667	0.166667	0	0	0
397	)	)	.	)	.......(((((((((((.(((..(((.((..............)).)))...))).))))))))))).........................(((.(((....))).)))........................................(((((((((((......................(((......))).(((.(((.(((..((.............)).)))))))))........((.((((((.((.((..(((....))).)).(((.(((((.............)))))..))).......)))))))).))...........|||||||||||||||||||||||||............................))))..)	0.166667	0	0.166667	0	0	0	0	0	0	0	0	0
398	)	)	.	)	.......(((((((((((.(((..(((.((..............)).)))...))).))))))))))).........................(((.(((....))).)))........................................(((((((((((......................(((......))).(((.(((.(((..((.............)).)))))))))........((.((((((.((.((..(((....))).)).(((.(((((.............)))))..))).......)))))))).))...........|||||||||||||||||||||||||............................))))..))	0.166667	0	0.166667	0	0	0	0	0	0	0	0	0
399	.	)	.	)	.......(((((((((((.(((..(((.((..............)).)))...))).))))))))))).........................(((.(((....))).)))........................................(((((((((((......................(((......))).(((.(((.(((..((.............)).)))))))))........((.((((((.((.((..(((....))).)).(((.(((((.............)))))..))).......)))))))).))...........|||||||||||||||||||||||||............................))))..)))	0	0	0	0	0	0	0	0	0	0	0	0
400	)	)	.	)	.......(((((((((((.(((..(((.((..............)).)))...))).))))))))))).........................(((.(((....))).)))........................................(((((((((((......................(((......))).(((.(((.(((..((.............)).)))))))))........((.((((((.((.((..(((....))).)).(((.(((((.............)))))..))).......)))))))).))...........|||||||||||||||||||||||||............................))))..))))	0	0	0	0	0	0	0	0	0	0	0	0
401	)	)	.	)	.......(((((((((((.(((..(((.((..............)).)))...))).))))))))))).........................(((.(((....))).)))........................................(((((((((((......................(((......))).(((.(((.(((..((.............)).)))))))))........((.((((((.((.((..(((....))).)).(((.(((((.............)))))..))).......)))))))).))...........|||||||||||||||||||||||||............................))))..)))…	0	0	0	0	0	0	0	0	0	0	0	0
402	)	)	.	)	.......(((((((((((.(((..(((.((..............)).)))...))).))))))))))).........................(((.(((....))).)))........................................(((((((((((......................(((......))).(((.(((.(((..((.............)).)))))))))........((.((((((.((.((..(((....))).)).(((.(((((.............)))))..))).......)))))))).))...........|||||||||||||||||||||||||............................))))..)))…	0	0	0	0	0	0	0	0	0	0	0	0
403	)	)	.	)	.......(((((((((((.(((..(((.((..............)).)))...))).))))))))))).........................(((.(((....))).)))........................................(((((((((((......................(((......))).(((.(((.(((..((.............)).)))))))))........((.((((((.((.((..(((....))).)).(((.(((((.............)))))..))).......)))))))).))...........|||||||||||||||||||||||||............................))))..)))…	0	0	0	0	0	0	0	0	0	0	0	0
404	)	.	.	.	.......(((((((((((.(((..(((.((..............)).)))...))).))))))))))).........................(((.(((....))).)))........................................(((((((((((......................(((......))).(((.(((.(((..((.............)).)))))))))........((.((((((.((.((..(((....))).)).(((.(((((.............)))))..))).......)))))))).))...........|||||||||||||||||||||||||............................))))..)))…	0	0	0	0	0	0	0	0	0	0	0	0
405	.	.	.	.	.......(((((((((((.(((..(((.((..............)).)))...))).))))))))))).........................(((.(((....))).)))........................................(((((((((((......................(((......))).(((.(((.(((..((.............)).)))))))))........((.((((((.((.((..(((....))).)).(((.(((((.............)))))..))).......)))))))).))...........|||||||||||||||||||||||||............................))))..)))…	0	0	0	0	0	0	0	0	0	0	0	0
406	.	.	.	.	.......(((((((((((.(((..(((.((..............)).)))...))).))))))))))).........................(((.(((....))).)))........................................(((((((((((......................(((......))).(((.(((.(((..((.............)).)))))))))........((.((((((.((.((..(((....))).)).(((.(((((.............)))))..))).......)))))))).))...........|||||||||||||||||||||||||............................))))..)))…	0	0	0	0	0	0	0	0	0	0	0	0
407	.	.	.	.	.......(((((((((((.(((..(((.((..............)).)))...))).))))))))))).........................(((.(((....))).)))........................................(((((((((((......................(((......))).(((.(((.(((..((.............)).)))))))))........((.((((((.((.((..(((....))).)).(((.(((((.............)))))..))).......)))))))).))...........|||||||||||||||||||||||||............................))))..)))…	0	0	0	0	0	0	0	0	0	0	0	0
408	.	.	.	.	.......(((((((((((.(((..(((.((..............)).)))...))).))))))))))).........................(((.(((....))).)))........................................(((((((((((......................(((......))).(((.(((.(((..((.............)).)))))))))........((.((((((.((.((..(((....))).)).(((.(((((.............)))))..))).......)))))))).))...........|||||||||||||||||||||||||............................))))..)))…	0	0	0	0	0	0	0	0	0	0	0	0
409	)	(	.	(	.......(((((((((((.(((..(((.((..............)).)))...))).))))))))))).........................(((.(((....))).)))........................................(((((((((((......................(((......))).(((.(((.(((..((.............)).)))))))))........((.((((((.((.((..(((....))).)).(((.(((((.............)))))..))).......)))))))).))...........|||||||||||||||||||||||||............................))))..)))…	0	0	0	0	0	0	0	0	0	0	0	0
410	)	(	.	(	.......(((((((((((.(((..(((.((..............)).)))...))).))))))))))).........................(((.(((....))).)))........................................(((((((((((......................(((......))).(((.(((.(((..((.............)).)))))))))........((.((((((.((.((..(((....))).)).(((.(((((.............)))))..))).......)))))))).))...........|||||||||||||||||||||||||............................))))..)))…	0	0	0	0	0	0	0	0	0	0	0	0
411	)	(	.	(	.......(((((((((((.(((..(((.((..............)).)))...))).))))))))))).........................(((.(((....))).)))........................................(((((((((((......................(((......))).(((.(((.(((..((.............)).)))))))))........((.((((((.((.((..(((....))).)).(((.(((((.............)))))..))).......)))))))).))...........|||||||||||||||||||||||||............................))))..)))…	0	0	0	0	0	0	0	0	0	0	0	0
412	.	(	.	(	.......(((((((((((.(((..(((.((..............)).)))...))).))))))))))).........................(((.(((....))).)))........................................(((((((((((......................(((......))).(((.(((.(((..((.............)).)))))))))........((.((((((.((.((..(((....))).)).(((.(((((.............)))))..))).......)))))))).))...........|||||||||||||||||||||||||............................))))..)))…	0	0	0	0	0	0	0	0	0	0	0	0
413	.	(	.	(	.......(((((((((((.(((..(((.((..............)).)))...))).))))))))))).........................(((.(((....))).)))........................................(((((((((((......................(((......))).(((.(((.(((..((.............)).)))))))))........((.((((((.((.((..(((....))).)).(((.(((((.............)))))..))).......)))))))).))...........|||||||||||||||||||||||||............................))))..)))…	0	0	0	0	0	0	0	0	0	0	0	0
414	.	(	.	(	.......(((((((((((.(((..(((.((..............)).)))...))).))))))))))).........................(((.(((....))).)))........................................(((((((((((......................(((......))).(((.(((.(((..((.............)).)))))))))........((.((((((.((.((..(((....))).)).(((.(((((.............)))))..))).......)))))))).))...........|||||||||||||||||||||||||............................))))..)))…	0	0	0	0	0	0	0	0	0	0	0	0
415	.	(	.	(	.......(((((((((((.(((..(((.((..............)).)))...))).))))))))))).........................(((.(((....))).)))........................................(((((((((((......................(((......))).(((.(((.(((..((.............)).)))))))))........((.((((((.((.((..(((....))).)).(((.(((((.............)))))..))).......)))))))).))...........|||||||||||||||||||||||||............................))))..)))…	0	0	0	0	0	0	0	0	0	0	0	0
416	.	.	.	.	.......(((((((((((.(((..(((.((..............)).)))...))).))))))))))).........................(((.(((....))).)))........................................(((((((((((......................(((......))).(((.(((.(((..((.............)).)))))))))........((.((((((.((.((..(((....))).)).(((.(((((.............)))))..))).......)))))))).))...........|||||||||||||||||||||||||............................))))..)))…	0	0	0	0	0	0	0	0	0	0	0	0
417	.	(	.	(	.......(((((((((((.(((..(((.((..............)).)))...))).))))))))))).........................(((.(((....))).)))........................................(((((((((((......................(((......))).(((.(((.(((..((.............)).)))))))))........((.((((((.((.((..(((....))).)).(((.(((((.............)))))..))).......)))))))).))...........|||||||||||||||||||||||||............................))))..)))…	0	0	0	0	0	0	0	0	0	0	0	0
418	.	(	.	(	.......(((((((((((.(((..(((.((..............)).)))...))).))))))))))).........................(((.(((....))).)))........................................(((((((((((......................(((......))).(((.(((.(((..((.............)).)))))))))........((.((((((.((.((..(((....))).)).(((.(((((.............)))))..))).......)))))))).))...........|||||||||||||||||||||||||............................))))..)))…	0	0	0	0	0	0	0	0	0	0	0	0
419	.	.	.	.	.......(((((((((((.(((..(((.((..............)).)))...))).))))))))))).........................(((.(((....))).)))........................................(((((((((((......................(((......))).(((.(((.(((..((.............)).)))))))))........((.((((((.((.((..(((....))).)).(((.(((((.............)))))..))).......)))))))).))...........|||||||||||||||||||||||||............................))))..)))…	0	0	0	0	0	0	0	0	0	0	0	0
420	.	.	.	.	.......(((((((((((.(((..(((.((..............)).)))...))).))))))))))).........................(((.(((....))).)))........................................(((((((((((......................(((......))).(((.(((.(((..((.............)).)))))))))........((.((((((.((.((..(((....))).)).(((.(((((.............)))))..))).......)))))))).))...........|||||||||||||||||||||||||............................))))..)))…	0	0	0	0	0	0	0	0	0	0	0	0
421	.	.	.	.	.......(((((((((((.(((..(((.((..............)).)))...))).))))))))))).........................(((.(((....))).)))........................................(((((((((((......................(((......))).(((.(((.(((..((.............)).)))))))))........((.((((((.((.((..(((....))).)).(((.(((((.............)))))..))).......)))))))).))...........|||||||||||||||||||||||||............................))))..)))…	0	0	0	0	0	0	0	0	0	0	0	0
422	.	.	.	.	.......(((((((((((.(((..(((.((..............)).)))...))).))))))))))).........................(((.(((....))).)))........................................(((((((((((......................(((......))).(((.(((.(((..((.............)).)))))))))........((.((((((.((.((..(((....))).)).(((.(((((.............)))))..))).......)))))))).))...........|||||||||||||||||||||||||............................))))..)))…	0	0	0	0	0	0	0	0	0	0	0	0
423	.	.	.	.	.......(((((((((((.(((..(((.((..............)).)))...))).))))))))))).........................(((.(((....))).)))........................................(((((((((((......................(((......))).(((.(((.(((..((.............)).)))))))))........((.((((((.((.((..(((....))).)).(((.(((((.............)))))..))).......)))))))).))...........|||||||||||||||||||||||||............................))))..)))…	0	0	0	0	0	0	0	0	0	0	0	0
424	.	.	.	.	.......(((((((((((.(((..(((.((..............)).)))...))).))))))))))).........................(((.(((....))).)))........................................(((((((((((......................(((......))).(((.(((.(((..((.............)).)))))))))........((.((((((.((.((..(((....))).)).(((.(((((.............)))))..))).......)))))))).))...........|||||||||||||||||||||||||............................))))..)))…	0	0	0	0	0	0	0	0	0	0	0	0
425	)	.	.	.	.......(((((((((((.(((..(((.((..............)).)))...))).))))))))))).........................(((.(((....))).)))........................................(((((((((((......................(((......))).(((.(((.(((..((.............)).)))))))))........((.((((((.((.((..(((....))).)).(((.(((((.............)))))..))).......)))))))).))...........|||||||||||||||||||||||||............................))))..)))…	0	0	0	0	0	0	0	0	0	0	0	0
426	)	.	.	.	.......(((((((((((.(((..(((.((..............)).)))...))).))))))))))).........................(((.(((....))).)))........................................(((((((((((......................(((......))).(((.(((.(((..((.............)).)))))))))........((.((((((.((.((..(((....))).)).(((.(((((.............)))))..))).......)))))))).))...........|||||||||||||||||||||||||............................))))..)))…	0	0	0	0	0	0	0	0	0	0	0	0
427	)	)	.	)	.......(((((((((((.(((..(((.((..............)).)))...))).))))))))))).........................(((.(((....))).)))........................................(((((((((((......................(((......))).(((.(((.(((..((.............)).)))))))))........((.((((((.((.((..(((....))).)).(((.(((((.............)))))..))).......)))))))).))...........|||||||||||||||||||||||||............................))))..)))…	0	0	0	0	0	0	0	0	0	0	0	0
428	)	)	.	)	.......(((((((((((.(((..(((.((..............)).)))...))).))))))))))).........................(((.(((....))).)))........................................(((((((((((......................(((......))).(((.(((.(((..((.............)).)))))))))........((.((((((.((.((..(((....))).)).(((.(((((.............)))))..))).......)))))))).))...........|||||||||||||||||||||||||............................))))..)))…	0	0	0	0	0	0	0	0	0	0	0	0
429	)	.	.	.	.......(((((((((((.(((..(((.((..............)).)))...))).))))))))))).........................(((.(((....))).)))........................................(((((((((((......................(((......))).(((.(((.(((..((.............)).)))))))))........((.((((((.((.((..(((....))).)).(((.(((((.............)))))..))).......)))))))).))...........|||||||||||||||||||||||||............................))))..)))…	0	0	0	0	0	0	0	0	0	0	0	0
430	)	)	.	)	.......(((((((((((.(((..(((.((..............)).)))...))).))))))))))).........................(((.(((....))).)))........................................(((((((((((......................(((......))).(((.(((.(((..((.............)).)))))))))........((.((((((.((.((..(((....))).)).(((.(((((.............)))))..))).......)))))))).))...........|||||||||||||||||||||||||............................))))..)))…	0	0	0	0	0	0	0	0	0	0	0	0
431	)	)	.	)	.......(((((((((((.(((..(((.((..............)).)))...))).))))))))))).........................(((.(((....))).)))........................................(((((((((((......................(((......))).(((.(((.(((..((.............)).)))))))))........((.((((((.((.((..(((....))).)).(((.(((((.............)))))..))).......)))))))).))...........|||||||||||||||||||||||||............................))))..)))…	0	0	0	0	0	0	0	0	0	0	0	0
432	)	)	.	)	.......(((((((((((.(((..(((.((..............)).)))...))).))))))))))).........................(((.(((....))).)))........................................(((((((((((......................(((......))).(((.(((.(((..((.............)).)))))))))........((.((((((.((.((..(((....))).)).(((.(((((.............)))))..))).......)))))))).))...........|||||||||||||||||||||||||............................))))..)))…	0	0	0	0	0	0	0	0	0	0	0	0
433	)	)	.	)	.......(((((((((((.(((..(((.((..............)).)))...))).))))))))))).........................(((.(((....))).)))........................................(((((((((((......................(((......))).(((.(((.(((..((.............)).)))))))))........((.((((((.((.((..(((....))).)).(((.(((((.............)))))..))).......)))))))).))...........|||||||||||||||||||||||||............................))))..)))…	0	0	0	0	0	0	0	0	0	0	0	0
434	)	)	.	)	.......(((((((((((.(((..(((.((..............)).)))...))).))))))))))).........................(((.(((....))).)))........................................(((((((((((......................(((......))).(((.(((.(((..((.............)).)))))))))........((.((((((.((.((..(((....))).)).(((.(((((.............)))))..))).......)))))))).))...........|||||||||||||||||||||||||............................))))..)))…	0	0	0	0	0	0	0	0	0	0	0	0
435	)	)	.	)	.......(((((((((((.(((..(((.((..............)).)))...))).))))))))))).........................(((.(((....))).)))........................................(((((((((((......................(((......))).(((.(((.(((..((.............)).)))))))))........((.((((((.((.((..(((....))).)).(((.(((((.............)))))..))).......)))))))).))...........|||||||||||||||||||||||||............................))))..)))…	0	0	0	0	0	0	0	0	0	0	0	0
436	.	)	.	)	.......(((((((((((.(((..(((.((..............)).)))...))).))))))))))).........................(((.(((....))).)))........................................(((((((((((......................(((......))).(((.(((.(((..((.............)).)))))))))........((.((((((.((.((..(((....))).)).(((.(((((.............)))))..))).......)))))))).))...........|||||||||||||||||||||||||............................))))..)))…	0	0	0	0	0	0	0	0	0	0	0	0
437	.	.	.	.	.......(((((((((((.(((..(((.((..............)).)))...))).))))))))))).........................(((.(((....))).)))........................................(((((((((((......................(((......))).(((.(((.(((..((.............)).)))))))))........((.((((((.((.((..(((....))).)).(((.(((((.............)))))..))).......)))))))).))...........|||||||||||||||||||||||||............................))))..)))…	0	0	0	0	0	0	0	0	0	0	0	0
438	)	.	.	.	.......(((((((((((.(((..(((.((..............)).)))...))).))))))))))).........................(((.(((....))).)))........................................(((((((((((......................(((......))).(((.(((.(((..((.............)).)))))))))........((.((((((.((.((..(((....))).)).(((.(((((.............)))))..))).......)))))))).))...........|||||||||||||||||||||||||............................))))..)))…	0	0	0	0	0	0	0	0	0	0	0	0
439	)	.	.	.	.......(((((((((((.(((..(((.((..............)).)))...))).))))))))))).........................(((.(((....))).)))........................................(((((((((((......................(((......))).(((.(((.(((..((.............)).)))))))))........((.((((((.((.((..(((....))).)).(((.(((((.............)))))..))).......)))))))).))...........|||||||||||||||||||||||||............................))))..)))…	0	0	0	0	0	0	0	0	0	0	0	0
440	.	.	.	.	.......(((((((((((.(((..(((.((..............)).)))...))).))))))))))).........................(((.(((....))).)))........................................(((((((((((......................(((......))).(((.(((.(((..((.............)).)))))))))........((.((((((.((.((..(((....))).)).(((.(((((.............)))))..))).......)))))))).))...........|||||||||||||||||||||||||............................))))..)))…	0	0	0	0	0	0	0	0	0	0	0	0
441	)	.	.	.	.......(((((((((((.(((..(((.((..............)).)))...))).))))))))))).........................(((.(((....))).)))........................................(((((((((((......................(((......))).(((.(((.(((..((.............)).)))))))))........((.((((((.((.((..(((....))).)).(((.(((((.............)))))..))).......)))))))).))...........|||||||||||||||||||||||||............................))))..)))…	0	0	0	0	0	0	0	0	0	0	0	0
442	)	.	.	.	.......(((((((((((.(((..(((.((..............)).)))...))).))))))))))).........................(((.(((....))).)))........................................(((((((((((......................(((......))).(((.(((.(((..((.............)).)))))))))........((.((((((.((.((..(((....))).)).(((.(((((.............)))))..))).......)))))))).))...........|||||||||||||||||||||||||............................))))..)))…	0	0	0	0	0	0	0	0	0	0	0	0
443	)	.	.	.	.......(((((((((((.(((..(((.((..............)).)))...))).))))))))))).........................(((.(((....))).)))........................................(((((((((((......................(((......))).(((.(((.(((..((.............)).)))))))))........((.((((((.((.((..(((....))).)).(((.(((((.............)))))..))).......)))))))).))...........|||||||||||||||||||||||||............................))))..)))…	0	0	0	0	0	0	0	0	0	0	0	0
444	)	.	.	.	.......(((((((((((.(((..(((.((..............)).)))...))).))))))))))).........................(((.(((....))).)))........................................(((((((((((......................(((......))).(((.(((.(((..((.............)).)))))))))........((.((((((.((.((..(((....))).)).(((.(((((.............)))))..))).......)))))))).))...........|||||||||||||||||||||||||............................))))..)))…	0	0	0	0	0	0	0	0	0	0	0	0
445	)	.	.	.	.......(((((((((((.(((..(((.((..............)).)))...))).))))))))))).........................(((.(((....))).)))........................................(((((((((((......................(((......))).(((.(((.(((..((.............)).)))))))))........((.((((((.((.((..(((....))).)).(((.(((((.............)))))..))).......)))))))).))...........|||||||||||||||||||||||||............................))))..)))…	0	0	0	0	0	0	0	0	0	0	0	0
446	)	.	.	.	.......(((((((((((.(((..(((.((..............)).)))...))).))))))))))).........................(((.(((....))).)))........................................(((((((((((......................(((......))).(((.(((.(((..((.............)).)))))))))........((.((((((.((.((..(((....))).)).(((.(((((.............)))))..))).......)))))))).))...........|||||||||||||||||||||||||............................))))..)))…	0	0	0	0	0	0	0	0	0	0	0	0
447	)	.	.	.	.......(((((((((((.(((..(((.((..............)).)))...))).))))))))))).........................(((.(((....))).)))........................................(((((((((((......................(((......))).(((.(((.(((..((.............)).)))))))))........((.((((((.((.((..(((....))).)).(((.(((((.............)))))..))).......)))))))).))...........|||||||||||||||||||||||||............................))))..)))…	0	0	0	0	0	0	0	0	0	0	0	0
448	)	.	.	.	.......(((((((((((.(((..(((.((..............)).)))...))).))))))))))).........................(((.(((....))).)))........................................(((((((((((......................(((......))).(((.(((.(((..((.............)).)))))))))........((.((((((.((.((..(((....))).)).(((.(((((.............)))))..))).......)))))))).))...........|||||||||||||||||||||||||............................))))..)))…	0	0	0	0	0	0	0	0	0	0	0	0
449	.	.	.	.	.......(((((((((((.(((..(((.((..............)).)))...))).))))))))))).........................(((.(((....))).)))........................................(((((((((((......................(((......))).(((.(((.(((..((.............)).)))))))))........((.((((((.((.((..(((....))).)).(((.(((((.............)))))..))).......)))))))).))...........|||||||||||||||||||||||||............................))))..)))…	0	0	0	0	0	0	0	0	0	0	0	0
450	.	.	.	.	.......(((((((((((.(((..(((.((..............)).)))...))).))))))))))).........................(((.(((....))).)))........................................(((((((((((......................(((......))).(((.(((.(((..((.............)).)))))))))........((.((((((.((.((..(((....))).)).(((.(((((.............)))))..))).......)))))))).))...........|||||||||||||||||||||||||............................))))..)))…	0	0	0	0	0	0	0	0	0	0	0	0
451	.	.	.	.	.......(((((((((((.(((..(((.((..............)).)))...))).))))))))))).........................(((.(((....))).)))........................................(((((((((((......................(((......))).(((.(((.(((..((.............)).)))))))))........((.((((((.((.((..(((....))).)).(((.(((((.............)))))..))).......)))))))).))...........|||||||||||||||||||||||||............................))))..)))…	0	0	0	0	0	0	0	0	0	0	0	0

## Sheet: ATXN3 e9 - 2ry Str + Mask
Structure 1 (no AO)	Structure 2 (H9A(+38+62))	H9A(+38+62) Mask	Structure 2 + Mask
.((((....((((.((((......))))....))))((((.((.((((.(((.(((((((.((((((.((((((((.....))).))))).)))))).)))))))))).)))).)).))))...((((.(((....))).))))((((((((....((((((.......))))))..........((((((((((..(.......).))))))))))..))))))))..))))....	..............((((......)))).....................((((((((((((((.....((((((((.....))).)))))))))))))))))))..............................(((((...........)))))((((((((.....))))))))........(((((((((((.(((.....))))))))))))))...................	...........................................................................................................xxxxxxxxxxxxxxxxxxxxxxxxx.........................................................................................................	..............((((......)))).....................((((((((((((((.....((((((((.....))).)))))))))))))))))))...|||||||||||||||||||||||||..(((((...........)))))((((((((.....))))))))........(((((((((((.(((.....))))))))))))))..................

## Sheet: ATXN3 e9 - HSF3.0
Name	Seq	Score	Pos	Start	Len	S+L	ESE Frac	ESS Frac	S1 Struc	S1 Score	S2 Struc	S2 Score	∆ Score	Name	Type	ESE Score	ESS Scores
{"name": "IIE (ESS Site)"	sequence: "GTGTTG"	CV: "NA"	position: "1"}	51	6	57	0	-0.166667	((.(((	0.166667	((((((	0	-0.166667	IIE	ESS	0	-0.166667
{"name": "IIE (ESS Site)"	sequence: "TGTTGT"	CV: "NA"	position: "2"}	52	6	58	0	-0.166667	(.((((	0.166667	((((((	0	-0.166667	IIE	ESS	0	-0.166667
{"name": "Sironi_motif2 (ESS Site)"	sequence: "TGTTGTG"	CV: "75.62"	position: "2"}	52	7	59	0	-0.142857	(.(((((	0.142857	(((((((	0	-0.142857	Sironi_motif2	ESS	0	-0.142857
{"name": "IIE (ESS Site)"	sequence: "GTTGTG"	CV: "NA"	position: "3"}	53	6	59	0	-0.166667	.(((((	0.166667	((((((	0	-0.166667	IIE	ESS	0	-0.166667
{"name": "IIE (ESS Site)"	sequence: "TTGTGT"	CV: "NA"	position: "4"}	54	6	60	0	-0.166667	((((((	0	((((((	0	0	IIE	ESS	0	0
{"name": "PESS (ESS Site)"	sequence: "TTGTGTTT"	CV: "-40.96781819916"	position: "4"}	54	8	62	0	-0.125	(((((((.	0.125	((((((((	0	-0.125	PESS	ESS	0	-0.125
{"name": "IIE (ESS Site)"	sequence: "TGTGTT"	CV: "NA"	position: "5"}	55	6	61	0	-0.166667	((((((	0	((((((	0	0	IIE	ESS	0	0
{"name": "PESS (ESS Site)"	sequence: "TGTGTTTT"	CV: "-41.86952247832"	position: "5"}	55	8	63	0	-0.125	((((((.(	0.125	((((((((	0	-0.125	PESS	ESS	0	-0.125
{"name": "IIE (ESS Site)"	sequence: "GTGTTT"	CV: "NA"	position: "6"}	56	6	62	0	-0.166667	(((((.	0.166667	((((((	0	-0.166667	IIE	ESS	0	-0.166667
{"name": "IIE (ESS Site)"	sequence: "TGTTTT"	CV: "NA"	position: "7"}	57	6	63	0	-0.166667	((((.(	0.166667	((((((	0	-0.166667	IIE	ESS	0	-0.166667
{"name": "IIE (ESS Site)"	sequence: "GTTTTG"	CV: "NA"	position: "8"}	58	6	64	0	-0.166667	(((.((	0.166667	((((((	0	-0.166667	IIE	ESS	0	-0.166667
{"name": "Fas ESS (ESS Site)"	sequence: "GTTTTG"	CV: "NA"	position: "8"}	58	6	64	0	-0.166667	(((.((	0.166667	((((((	0	-0.166667	Fas ESS	ESS	0	-0.166667
{"name": "IIE (ESS Site)"	sequence: "TTTTGT"	CV: "NA"	position: "9"}	59	6	65	0	-0.166667	((.(((	0.166667	(((((.	0.166667	0	IIE	ESS	0	0
{"name": "PESS (ESS Site)"	sequence: "TTTTGTTT"	CV: "-73.96754030502"	position: "9"}	59	8	67	0	-0.125	((.(((((	0.125	(((((...	0.375	0.25	PESS	ESS	0	0.25
{"name": "IIE (ESS Site)"	sequence: "TTTGTT"	CV: "NA"	position: "10"}	60	6	66	0	-0.166667	(.((((	0.166667	((((..	0.333333	0.166667	IIE	ESS	0	0.166667
{"name": "Fas ESS (ESS Site)"	sequence: "TTTGTT"	CV: "NA"	position: "10"}	60	6	66	0	-0.166667	(.((((	0.166667	((((..	0.333333	0.166667	Fas ESS	ESS	0	0.166667
{"name": "PESS (ESS Site)"	sequence: "TTTGTTTT"	CV: "-69.08406919979"	position: "10"}	60	8	68	0	-0.125	(.((((((	0.125	((((....	0.5	0.375	PESS	ESS	0	0.375
{"name": "IIE (ESS Site)"	sequence: "TTGTTT"	CV: "NA"	position: "11"}	61	6	67	0	-0.166667	.(((((	0.166667	(((...	0.5	0.333333	IIE	ESS	0	0.333333
{"name": "Fas ESS (ESS Site)"	sequence: "TTGTTT"	CV: "NA"	position: "11"}	61	6	67	0	-0.166667	.(((((	0.166667	(((...	0.5	0.333333	Fas ESS	ESS	0	0.333333
{"name": "IIE (ESS Site)"	sequence: "TGTTTT"	CV: "NA"	position: "12"}	62	6	68	0	-0.166667	((((((	0	((....	0.666667	0.666667	IIE	ESS	0	0.666667
{"name": "IIE (ESS Site)"	sequence: "GTTTTC"	CV: "NA"	position: "13"}	63	6	69	0	-0.166667	(((((.	0.166667	(.....	0.833333	0.666667	IIE	ESS	0	0.666667
{"name": "ESE_SC35 (ESE Site)"	sequence: "GTTTTCAG"	CV: "79.73"	position: "13"}	63	8	71	0.125	0	(((((.((	0.125	(.....((	0.625	0.5	ESE_SC35	ESE	0.5	0
{"name": "IIE (ESS Site)"	sequence: "TTTTCA"	CV: "NA"	position: "14"}	64	6	70	0	-0.166667	((((.(	0.166667	.....(	0.833333	0.666667	IIE	ESS	0	0.666667
{"name": "ESE_SRp40 (ESE Site)"	sequence: "TTTCAGG"	CV: "91.76"	position: "15"}	65	7	72	0.142857	0	(((.(((	0.142857	....(((	0.571429	0.428571	ESE_SRp40	ESE	0.428571	0
{"name": "ESS_hnRNPA1 (ESS Site)"	sequence: "CAGGTA"	CV: "73.46"	position: "18"}	68	6	74	0	-0.166667	.(((((	0.166667	.(((((	0.166667	0	ESS_hnRNPA1	ESS	0	0
{"name": "Fas ESS (ESS Site)"	sequence: "AGGTAG"	CV: "NA"	position: "19"}	69	6	75	0	-0.166667	((((((	0	((((((	0	0	Fas ESS	ESS	0	0
{"name": "IIE (ESS Site)"	sequence: "GGTAGT"	CV: "NA"	position: "20"}	70	6	76	0	-0.166667	((((((	0	((((((	0	0	IIE	ESS	0	0
{"name": "Fas ESS (ESS Site)"	sequence: "GGTAGT"	CV: "NA"	position: "20"}	70	6	76	0	-0.166667	((((((	0	((((((	0	0	Fas ESS	ESS	0	0
{"name": "IIE (ESS Site)"	sequence: "GTAGTT"	CV: "NA"	position: "21"}	71	6	77	0	-0.166667	((((((	0	((((((	0	0	IIE	ESS	0	0
{"name": "Fas ESS (ESS Site)"	sequence: "GTAGTT"	CV: "NA"	position: "21"}	71	6	77	0	-0.166667	((((((	0	((((((	0	0	Fas ESS	ESS	0	0
{"name": "ESS_hnRNPA1 (ESS Site)"	sequence: "TAGTTC"	CV: "71.55"	position: "22"}	72	6	78	0	-0.166667	(((((.	0.166667	(((((.	0.166667	0	ESS_hnRNPA1	ESS	0	0
{"name": "ESE_SC35 (ESE Site)"	sequence: "AGTTCCAG"	CV: "77.64"	position: "23"}	73	8	81	0.125	0	((((....	0.5	((((....	0.5	0	ESE_SC35	ESE	0	0
{"name": "Sironi_motif3 (ESS Site)"	sequence: "AGTTCCAG"	CV: "61.03"	position: "23"}	73	8	81	0	-0.125	((((....	0.5	((((....	0.5	0	Sironi_motif3	ESS	0	0
{"name": "EIE (ESE Site)"	sequence: "CCAGAA"	CV: "NA"	position: "27"}	77	6	83	0.166667	0	.....)	0.833333	.....)	0.833333	0	EIE	ESE	0	0
{"name": "Sironi_motif1 (ESS Site)"	sequence: "CCAGAAAC"	CV: "60.83"	position: "27"}	77	8	85	0	-0.125	.....)))	0.625	.....)))	0.625	0	Sironi_motif1	ESS	0	0
{"name": "ESS_hnRNPA1 (ESS Site)"	sequence: "CAGAAA"	CV: "65.36"	position: "28"}	78	6	84	0	-0.166667	....))	0.666667	....))	0.666667	0	ESS_hnRNPA1	ESS	0	0
{"name": "RESCUE ESE (ESE Site)"	sequence: "CAGAAA"	CV: "NA"	position: "28"}	78	6	84	0.166667	0	....))	0.666667	....))	0.666667	0	RESCUE ESE	ESE	0	0
{"name": "EIE (ESE Site)"	sequence: "CAGAAA"	CV: "NA"	position: "28"}	78	6	84	0.166667	0	....))	0.666667	....))	0.666667	0	EIE	ESE	0	0
{"name": "RESCUE ESE (ESE Site)"	sequence: "AGAAAC"	CV: "NA"	position: "29"}	79	6	85	0.166667	0	...)))	0.5	...)))	0.5	0	RESCUE ESE	ESE	0	0
{"name": "EIE (ESE Site)"	sequence: "AGAAAC"	CV: "NA"	position: "29"}	79	6	85	0.166667	0	...)))	0.5	...)))	0.5	0	EIE	ESE	0	0
{"name": "RESCUE ESE (ESE Site)"	sequence: "GAAACA"	CV: "NA"	position: "30"}	80	6	86	0.166667	0	..))).	0.5	..))).	0.5	0	RESCUE ESE	ESE	0	0
{"name": "EIE (ESE Site)"	sequence: "GAAACA"	CV: "NA"	position: "30"}	80	6	86	0.166667	0	..))).	0.5	..))).	0.5	0	EIE	ESE	0	0
{"name": "ESE_Tra2 (ESE Site)"	sequence: "AACAT"	CV: "81.36"	position: "32"}	82	5	87	0.2	0	))).)	0.2	))).)	0.2	0	ESE_Tra2	ESE	0	0
{"name": "ESE_SRp55 (ESE Site)"	sequence: "AACATA"	CV: "74.09"	position: "32"}	82	6	88	0.166667	0	))).))	0.166667	))).))	0.166667	0	ESE_SRp55	ESE	0	0
{"name": "Sironi_motif3 (ESS Site)"	sequence: "TATCTCAA"	CV: "74.29"	position: "36"}	86	8	94	0	-0.125	))))).))	0.125	))))))))	0	-0.125	Sironi_motif3	ESS	0	-0.125
{"name": "PESE (ESE Site)"	sequence: "ATCTCAAG"	CV: "28.17473320088"	position: "37"}	87	8	95	0.125	0	)))).)))	0.125	))))))))	0	-0.125	PESE	ESE	-0.125	0
{"name": "ESE_SRp40 (ESE Site)"	sequence: "TCTCAAG"	CV: "90.2"	position: "38"}	88	7	95	0.142857	0	))).)))	0.142857	)))))))	0	-0.142857	ESE_SRp40	ESE	-0.142857	0
{"name": "EIE (ESE Site)"	sequence: "CTCAAG"	CV: "NA"	position: "39"}	89	6	95	0.166667	0	)).)))	0.166667	))))))	0	-0.166667	EIE	ESE	-0.166667	0
{"name": "ESE_ASF (ESE Site)"	sequence: "CTCAAGA"	CV: "79.18"	position: "39"}	89	7	96	0.142857	0	)).))))	0.142857	)))))))	0	-0.142857	ESE_ASF	ESE	-0.142857	0
{"name": "ESE_ASFB (ESE Site)"	sequence: "CTCAAGA"	CV: "79.62"	position: "39"}	89	7	96	0.142857	0	)).))))	0.142857	)))))))	0	-0.142857	ESE_ASFB	ESE	-0.142857	0
{"name": "PESE (ESE Site)"	sequence: "CTCAAGAT"	CV: "33.63970816967"	position: "39"}	89	8	97	0.125	0	)).)))))	0.125	))))))))	0	-0.125	PESE	ESE	-0.125	0
{"name": "RESCUE ESE (ESE Site)"	sequence: "TCAAGA"	CV: "NA"	position: "40"}	90	6	96	0.166667	0	).))))	0.166667	))))))	0	-0.166667	RESCUE ESE	ESE	-0.166667	0
{"name": "EIE (ESE Site)"	sequence: "TCAAGA"	CV: "NA"	position: "40"}	90	6	96	0.166667	0	).))))	0.166667	))))))	0	-0.166667	EIE	ESE	-0.166667	0
{"name": "ESE_9G8 (ESE Site)"	sequence: "CAAGAT"	CV: "67.39"	position: "41"}	91	6	97	0.166667	0	.)))))	0.166667	))))))	0	-0.166667	ESE_9G8	ESE	-0.166667	0
{"name": "RESCUE ESE (ESE Site)"	sequence: "CAAGAT"	CV: "NA"	position: "41"}	91	6	97	0.166667	0	.)))))	0.166667	))))))	0	-0.166667	RESCUE ESE	ESE	-0.166667	0
{"name": "EIE (ESE Site)"	sequence: "CAAGAT"	CV: "NA"	position: "41"}	91	6	97	0.166667	0	.)))))	0.166667	))))))	0	-0.166667	EIE	ESE	-0.166667	0
{"name": "Sironi_motif1 (ESS Site)"	sequence: "CAAGATAT"	CV: "69.54"	position: "41"}	91	8	99	0	-0.125	.)))))).	0.25	))))))))	0	-0.25	Sironi_motif1	ESS	0	-0.25
{"name": "ESE_Tra2 (ESE Site)"	sequence: "AAGAT"	CV: "87.22"	position: "42"}	92	5	97	0.2	0	)))))	0	)))))	0	0	ESE_Tra2	ESE	0	0
{"name": "EIE (ESE Site)"	sequence: "AAGATA"	CV: "NA"	position: "42"}	92	6	98	0.166667	0	))))))	0	))))))	0	0	EIE	ESE	0	0
{"name": "EIE (ESE Site)"	sequence: "AGATAT"	CV: "NA"	position: "43"}	93	6	99	0.166667	0	))))).	0.166667	))))))	0	-0.166667	EIE	ESE	-0.166667	0
{"name": "RESCUE ESE (ESE Site)"	sequence: "GATATG"	CV: "NA"	position: "44"}	94	6	100	0.166667	0	)))).)	0.166667	))))))	0	-0.166667	RESCUE ESE	ESE	-0.166667	0
{"name": "EIE (ESE Site)"	sequence: "GATATG"	CV: "NA"	position: "44"}	94	6	100	0.166667	0	)))).)	0.166667	))))))	0	-0.166667	EIE	ESE	-0.166667	0
{"name": "EIE (ESE Site)"	sequence: "ATATGA"	CV: "NA"	position: "45"}	95	6	101	0.166667	0	))).))	0.166667	))))))	0	-0.166667	EIE	ESE	-0.166667	0
{"name": "ESE_9G8 (ESE Site)"	sequence: "TATGAC"	CV: "73.83"	position: "46"}	96	6	102	0.166667	0	)).)))	0.166667	))))))	0	-0.166667	ESE_9G8	ESE	-0.166667	0
{"name": "ESS_hnRNPA1 (ESS Site)"	sequence: "TATGAC"	CV: "70.84"	position: "46"}	96	6	102	0	-0.166667	)).)))	0.166667	))))))	0	-0.166667	ESS_hnRNPA1	ESS	0	-0.166667
{"name": "EIE (ESE Site)"	sequence: "TATGAC"	CV: "NA"	position: "46"}	96	6	102	0.166667	0	)).)))	0.166667	))))))	0	-0.166667	EIE	ESE	-0.166667	0
{"name": "EIE (ESE Site)"	sequence: "ATGACA"	CV: "NA"	position: "47"}	97	6	103	0.166667	0	).))))	0.166667	))))))	0	-0.166667	EIE	ESE	-0.166667	0
{"name": "ESE_SRp40 (ESE Site)"	sequence: "TGACACA"	CV: "78.89"	position: "48"}	98	7	105	0.142857	0	.))))))	0.142857	)))))))	0	-0.142857	ESE_SRp40	ESE	-0.142857	0
{"name": "PESE (ESE Site)"	sequence: "GACACAGA"	CV: "31.54596244696"	position: "49"}	99	8	107	0.125	0	))))))))	0	))))))..	0.25	0.25	PESE	ESE	0.25	0
{"name": "ESE_SRp40 (ESE Site)"	sequence: "ACACAGA"	CV: "79.37"	position: "50"}	100	7	107	0.142857	0	)))))))	0	)))))..	0.285714	0.285714	ESE_SRp40	ESE	0.285714	0
{"name": "ESE_SRp55 (ESE Site)"	sequence: "CACAGA"	CV: "75.63"	position: "51"}	101	6	107	0.166667	0	))))))	0	))))..	0.333333	0.333333	ESE_SRp55	ESE	0.333333	0
{"name": "ESE_ASFB (ESE Site)"	sequence: "CACAGAC"	CV: "71.38"	position: "51"}	101	7	108	0.142857	0	)))))))	0	))))...	0.428571	0.428571	ESE_ASFB	ESE	0.428571	0
{"name": "PESS (ESS Site)"	sequence: "CACAGACA"	CV: "-29.39041638497"	position: "51"}	101	8	109	0	-0.125	))))))))	0	))))...|	0.375	0.375	PESS	ESS	0	0.375
{"name": "ESE_9G8 (ESE Site)"	sequence: "ACAGAC"	CV: "60.88"	position: "52"}	102	6	108	0.166667	0	))))))	0	)))...	0.5	0.5	ESE_9G8	ESE	0.5	0
{"name": "EIE (ESE Site)"	sequence: "ACAGAC"	CV: "NA"	position: "52"}	102	6	108	0.166667	0	))))))	0	)))...	0.5	0.5	EIE	ESE	0.5	0
{"name": "Sironi_motif1 (ESS Site)"	sequence: "ACAGACAT"	CV: "60.5"	position: "52"}	102	8	110	0	-0.125	))))))).	0.125	)))...||	0.375	0.25	Sironi_motif1	ESS	0	0.25
{"name": "EIE (ESE Site)"	sequence: "CAGACA"	CV: "NA"	position: "53"}	103	6	109	0.166667	0	))))))	0	))...|	0.5	0.5	EIE	ESE	0.5	0
{"name": "ESE_ASF (ESE Site)"	sequence: "CAGACAT"	CV: "81.92"	position: "53"}	103	7	110	0.142857	0	)))))).	0.142857	))...||	0.428571	0.285714	ESE_ASF	ESE	0.285714	0
{"name": "ESE_ASFB (ESE Site)"	sequence: "CAGACAT"	CV: "79.23"	position: "53"}	103	7	110	0.142857	0	)))))).	0.142857	))...||	0.428571	0.285714	ESE_ASFB	ESE	0.285714	0
{"name": "RESCUE ESE (ESE Site)"	sequence: "AGACAT"	CV: "NA"	position: "54"}	104	6	110	0.166667	0	))))).	0.166667	)...||	0.5	0.333333	RESCUE ESE	ESE	0.333333	0
{"name": "EIE (ESE Site)"	sequence: "AGACAT"	CV: "NA"	position: "54"}	104	6	110	0.166667	0	))))).	0.166667	)...||	0.5	0.333333	EIE	ESE	0.333333	0
{"name": "PESE (ESE Site)"	sequence: "AGACATCA"	CV: "28.36967386841"	position: "54"}	104	8	112	0.125	0	))))).))	0.125	)...||||	0.375	0.25	PESE	ESE	0.25	0
{"name": "ESE_9G8 (ESE Site)"	sequence: "GACATC"	CV: "59.27"	position: "55"}	105	6	111	0.166667	0	)))).)	0.166667	...|||	0.5	0.333333	ESE_9G8	ESE	0.333333	0
{"name": "EIE (ESE Site)"	sequence: "GACATC"	CV: "NA"	position: "55"}	105	6	111	0.166667	0	)))).)	0.166667	...|||	0.5	0.333333	EIE	ESE	0.333333	0
{"name": "EIE (ESE Site)"	sequence: "ACATCA"	CV: "NA"	position: "56"}	106	6	112	0.166667	0	))).))	0.166667	..||||	0.333333	0.166667	EIE	ESE	0.166667	0
{"name": "PESE (ESE Site)"	sequence: "ACATCAGG"	CV: "24.31449321648"	position: "56"}	106	8	114	0.125	0	))).))))	0.125	..||||||	0.25	0.125	PESE	ESE	0.125	0
{"name": "RESCUE ESE (ESE Site)"	sequence: "CATCAG"	CV: "NA"	position: "57"}	107	6	113	0.166667	0	)).)))	0.166667	.|||||	0.166667	0	RESCUE ESE	ESE	0	0
{"name": "Sironi_motif1 (ESS Site)"	sequence: "CATCAGGT"	CV: "66.69"	position: "57"}	107	8	115	0	-0.125	)).)))).	0.25	.|||||||	0.125	-0.125	Sironi_motif1	ESS	0	-0.125
{"name": "ESE_ASF (ESE Site)"	sequence: "ATCAGGT"	CV: "73.65"	position: "58"}	108	7	115	0.142857	0	).)))).	0.285714	|||||||	0	-0.285714	ESE_ASF	ESE	-0.285714	0
{"name": "ESS_hnRNPA1 (ESS Site)"	sequence: "CAGGTA"	CV: "73.46"	position: "60"}	110	6	116	0	-0.166667	)))).)	0.166667	||||||	0	-0.166667	ESS_hnRNPA1	ESS	0	-0.166667
{"name": "EIE (ESE Site)"	sequence: "GTACAA"	CV: "NA"	position: "63"}	113	6	119	0.166667	0	).)).)	0.333333	||||||	0	-0.333333	EIE	ESE	-0.333333	0
{"name": "EIE (ESE Site)"	sequence: "TACAAA"	CV: "NA"	position: "64"}	114	6	120	0.166667	0	.)).))	0.333333	||||||	0	-0.333333	EIE	ESE	-0.333333	0
{"name": "EIE (ESE Site)"	sequence: "ACAAAT"	CV: "NA"	position: "65"}	115	6	121	0.166667	0	)).)))	0.166667	||||||	0	-0.166667	EIE	ESE	-0.166667	0
{"name": "EIE (ESE Site)"	sequence: "ATCTTA"	CV: "NA"	position: "69"}	119	6	125	0.166667	0	)))...	0.5	||||||	0	-0.5	EIE	ESE	-0.5	0
{"name": "EIE (ESE Site)"	sequence: "TCTTAC"	CV: "NA"	position: "70"}	120	6	126	0.166667	0	))...(	0.5	||||||	0	-0.5	EIE	ESE	-0.5	0
{"name": "EIE (ESE Site)"	sequence: "CTTACT"	CV: "NA"	position: "71"}	121	6	127	0.166667	0	)...((	0.5	||||||	0	-0.5	EIE	ESE	-0.5	0
{"name": "IIE (ESS Site)"	sequence: "TTACTT"	CV: "NA"	position: "72"}	122	6	128	0	-0.166667	...(((	0.5	||||||	0	-0.5	IIE	ESS	0	-0.5
{"name": "ESE_SRp40 (ESE Site)"	sequence: "TTACTTC"	CV: "79.37"	position: "72"}	122	7	129	0.142857	0	...((((	0.428571	|||||||	0	-0.428571	ESE_SRp40	ESE	-0.428571	0
{"name": "ESE_SRp55 (ESE Site)"	sequence: "TACTTC"	CV: "77.68"	position: "73"}	123	6	129	0.166667	0	..((((	0.333333	||||||	0	-0.333333	ESE_SRp55	ESE	-0.333333	0
{"name": "RESCUE ESE (ESE Site)"	sequence: "ACTTCA"	CV: "NA"	position: "74"}	124	6	130	0.166667	0	.((((.	0.333333	||||||	0	-0.333333	RESCUE ESE	ESE	-0.333333	0
{"name": "RESCUE ESE (ESE Site)"	sequence: "CTTCAG"	CV: "NA"	position: "75"}	125	6	131	0.166667	0	((((.(	0.166667	||||||	0	-0.166667	RESCUE ESE	ESE	-0.166667	0
{"name": "RESCUE ESE (ESE Site)"	sequence: "TTCAGA"	CV: "NA"	position: "76"}	126	6	132	0.166667	0	(((.((	0.166667	||||||	0	-0.166667	RESCUE ESE	ESE	-0.166667	0
{"name": "PESE (ESE Site)"	sequence: "TTCAGAAG"	CV: "28.47129187595"	position: "76"}	126	8	134	0.125	0	(((.(((.	0.25	|||||||.	0.125	-0.125	PESE	ESE	-0.125	0
{"name": "RESCUE ESE (ESE Site)"	sequence: "TCAGAA"	CV: "NA"	position: "77"}	127	6	133	0.166667	0	((.(((	0.166667	||||||	0	-0.166667	RESCUE ESE	ESE	-0.166667	0
{"name": "EIE (ESE Site)"	sequence: "TCAGAA"	CV: "NA"	position: "77"}	127	6	133	0.166667	0	((.(((	0.166667	||||||	0	-0.166667	EIE	ESE	-0.166667	0
{"name": "ESE_SRp40 (ESE Site)"	sequence: "TCAGAAG"	CV: "86.19"	position: "77"}	127	7	134	0.142857	0	((.(((.	0.285714	||||||.	0.142857	-0.142857	ESE_SRp40	ESE	-0.142857	0
{"name": "Sironi_motif1 (ESS Site)"	sequence: "TCAGAAGA"	CV: "61.96"	position: "77"}	127	8	135	0	-0.125	((.(((..	0.375	||||||..	0.25	-0.125	Sironi_motif1	ESS	0	-0.125
{"name": "PESE (ESE Site)"	sequence: "TCAGAAGA"	CV: "37.08974321752"	position: "77"}	127	8	135	0.125	0	((.(((..	0.375	||||||..	0.25	-0.125	PESE	ESE	-0.125	0
{"name": "RESCUE ESE (ESE Site)"	sequence: "CAGAAG"	CV: "NA"	position: "78"}	128	6	134	0.166667	0	(.(((.	0.333333	|||||.	0.166667	-0.166667	RESCUE ESE	ESE	-0.166667	0
{"name": "EIE (ESE Site)"	sequence: "CAGAAG"	CV: "NA"	position: "78"}	128	6	134	0.166667	0	(.(((.	0.333333	|||||.	0.166667	-0.166667	EIE	ESE	-0.166667	0
{"name": "ESE_ASF (ESE Site)"	sequence: "CAGAAGA"	CV: "84.25"	position: "78"}	128	7	135	0.142857	0	(.(((..	0.428571	|||||..	0.285714	-0.142857	ESE_ASF	ESE	-0.142857	0
{"name": "ESE_ASFB (ESE Site)"	sequence: "CAGAAGA"	CV: "80"	position: "78"}	128	7	135	0.142857	0	(.(((..	0.428571	|||||..	0.285714	-0.142857	ESE_ASFB	ESE	-0.142857	0
{"name": "PESE (ESE Site)"	sequence: "CAGAAGAG"	CV: "36.94208603105"	position: "78"}	128	8	136	0.125	0	(.(((...	0.5	|||||..(	0.25	-0.25	PESE	ESE	-0.25	0
{"name": "RESCUE ESE (ESE Site)"	sequence: "AGAAGA"	CV: "NA"	position: "79"}	129	6	135	0.166667	0	.(((..	0.5	||||..	0.333333	-0.166667	RESCUE ESE	ESE	-0.166667	0
{"name": "EIE (ESE Site)"	sequence: "AGAAGA"	CV: "NA"	position: "79"}	129	6	135	0.166667	0	.(((..	0.5	||||..	0.333333	-0.166667	EIE	ESE	-0.166667	0
{"name": "PESE (ESE Site)"	sequence: "AGAAGAGC"	CV: "38.21376281113"	position: "79"}	129	8	137	0.125	0	.(((....	0.625	||||..((	0.25	-0.375	PESE	ESE	-0.375	0
{"name": "ESE_9G8 (ESE Site)"	sequence: "GAAGAG"	CV: "84.7"	position: "80"}	130	6	136	0.166667	0	(((...	0.5	|||..(	0.333333	-0.166667	ESE_9G8	ESE	-0.166667	0
{"name": "RESCUE ESE (ESE Site)"	sequence: "GAAGAG"	CV: "NA"	position: "80"}	130	6	136	0.166667	0	(((...	0.5	|||..(	0.333333	-0.166667	RESCUE ESE	ESE	-0.166667	0
{"name": "EIE (ESE Site)"	sequence: "GAAGAG"	CV: "NA"	position: "80"}	130	6	136	0.166667	0	(((...	0.5	|||..(	0.333333	-0.166667	EIE	ESE	-0.166667	0
{"name": "Sironi_motif1 (ESS Site)"	sequence: "GAAGAGCT"	CV: "80.78"	position: "80"}	130	8	138	0	-0.125	(((....)	0.5	|||..(((	0.25	-0.25	Sironi_motif1	ESS	0	-0.25
{"name": "ESE_Tra2 (ESE Site)"	sequence: "AAGAG"	CV: "89.41"	position: "81"}	131	5	136	0.2	0	((...	0.6	||..(	0.4	-0.2	ESE_Tra2	ESE	-0.2	0
{"name": "ESS_hnRNPA1 (ESS Site)"	sequence: "AAGAGC"	CV: "71.79"	position: "81"}	131	6	137	0	-0.166667	((....	0.666667	||..((	0.333333	-0.333333	ESS_hnRNPA1	ESS	0	-0.333333
{"name": "EIE (ESE Site)"	sequence: "AAGAGC"	CV: "NA"	position: "81"}	131	6	137	0.166667	0	((....	0.666667	||..((	0.333333	-0.333333	EIE	ESE	-0.333333	0
{"name": "IIE (ESS Site)"	sequence: "GAGCTT"	CV: "NA"	position: "83"}	133	6	139	0	-0.166667	....))	0.666667	..((((	0.333333	-0.333333	IIE	ESS	0	-0.333333
{"name": "EIE (ESE Site)"	sequence: "GCTTCG"	CV: "NA"	position: "85"}	135	6	141	0.166667	0	..))).	0.5	(((((.	0.166667	-0.333333	EIE	ESE	-0.333333	0
{"name": "ESE_ASFB (ESE Site)"	sequence: "CTTCGGA"	CV: "73.62"	position: "86"}	136	7	143	0.142857	0	.))).))	0.285714	((((...	0.428571	0.142857	ESE_ASFB	ESE	0.142857	0
{"name": "ESE_SRp55 (ESE Site)"	sequence: "TTCGGA"	CV: "74.03"	position: "87"}	137	6	143	0.166667	0	))).))	0.166667	(((...	0.5	0.333333	ESE_SRp55	ESE	0.333333	0
{"name": "ESE_ASF (ESE Site)"	sequence: "CGGAAGA"	CV: "81.63"	position: "89"}	139	7	146	0.142857	0	).))))(	0.142857	(......	0.857143	0.714286	ESE_ASF	ESE	0.714286	0
{"name": "ESE_ASFB (ESE Site)"	sequence: "CGGAAGA"	CV: "82.23"	position: "89"}	139	7	146	0.142857	0	).))))(	0.142857	(......	0.857143	0.714286	ESE_ASFB	ESE	0.714286	0
{"name": "RESCUE ESE (ESE Site)"	sequence: "GGAAGA"	CV: "NA"	position: "90"}	140	6	146	0.166667	0	.))))(	0.166667	......	1	0.833333	RESCUE ESE	ESE	0.833333	0
{"name": "EIE (ESE Site)"	sequence: "GGAAGA"	CV: "NA"	position: "90"}	140	6	146	0.166667	0	.))))(	0.166667	......	1	0.833333	EIE	ESE	0.833333	0
{"name": "Sironi_motif2 (ESS Site)"	sequence: "GGAAGAG"	CV: "62.31"	position: "90"}	140	7	147	0	-0.142857	.))))((	0.142857	.......	1	0.857143	Sironi_motif2	ESS	0	0.857143
{"name": "PESE (ESE Site)"	sequence: "GGAAGAGA"	CV: "35.27513594001"	position: "90"}	140	8	148	0.125	0	.))))(((	0.125	........	1	0.875	PESE	ESE	0.875	0
{"name": "ESE_9G8 (ESE Site)"	sequence: "GAAGAG"	CV: "84.7"	position: "91"}	141	6	147	0.166667	0	))))((	0	......	1	1	ESE_9G8	ESE	1	0
{"name": "RESCUE ESE (ESE Site)"	sequence: "GAAGAG"	CV: "NA"	position: "91"}	141	6	147	0.166667	0	))))((	0	......	1	1	RESCUE ESE	ESE	1	0
{"name": "EIE (ESE Site)"	sequence: "GAAGAG"	CV: "NA"	position: "91"}	141	6	147	0.166667	0	))))((	0	......	1	1	EIE	ESE	1	0
{"name": "Sironi_motif1 (ESS Site)"	sequence: "GAAGAGAC"	CV: "70.48"	position: "91"}	141	8	149	0	-0.125	))))((((	0	........	1	1	Sironi_motif1	ESS	0	1
{"name": "ESE_Tra2 (ESE Site)"	sequence: "AAGAG"	CV: "89.41"	position: "92"}	142	5	147	0.2	0	)))((	0	.....	1	1	ESE_Tra2	ESE	1	0
{"name": "ESS_hnRNPA1 (ESS Site)"	sequence: "AAGAGA"	CV: "73.7"	position: "92"}	142	6	148	0	-0.166667	)))(((	0	......	1	1	ESS_hnRNPA1	ESS	0	1
{"name": "RESCUE ESE (ESE Site)"	sequence: "AAGAGA"	CV: "NA"	position: "92"}	142	6	148	0.166667	0	)))(((	0	......	1	1	RESCUE ESE	ESE	1	0
{"name": "EIE (ESE Site)"	sequence: "AAGAGA"	CV: "NA"	position: "92"}	142	6	148	0.166667	0	)))(((	0	......	1	1	EIE	ESE	1	0
{"name": "ESE_9G8 (ESE Site)"	sequence: "AGAGAC"	CV: "65.17"	position: "93"}	143	6	149	0.166667	0	))((((	0	......	1	1	ESE_9G8	ESE	1	0
{"name": "EIE (ESE Site)"	sequence: "AGAGAC"	CV: "NA"	position: "93"}	143	6	149	0.166667	0	))((((	0	......	1	1	EIE	ESE	1	0
{"name": "Sironi_motif1 (ESS Site)"	sequence: "AGAGACGA"	CV: "65.2"	position: "93"}	143	8	151	0	-0.125	))((((((	0	........	1	1	Sironi_motif1	ESS	0	1
{"name": "EIE (ESE Site)"	sequence: "GAGACG"	CV: "NA"	position: "94"}	144	6	150	0.166667	0	)(((((	0	......	1	1	EIE	ESE	1	0
{"name": "ESE_ASF (ESE Site)"	sequence: "GAGACGA"	CV: "89.72"	position: "94"}	144	7	151	0.142857	0	)((((((	0	.......	1	1	ESE_ASF	ESE	1	0
{"name": "ESE_ASFB (ESE Site)"	sequence: "GAGACGA"	CV: "72.38"	position: "94"}	144	7	151	0.142857	0	)((((((	0	.......	1	1	ESE_ASFB	ESE	1	0
{"name": "RESCUE ESE (ESE Site)"	sequence: "AGACGA"	CV: "NA"	position: "95"}	145	6	151	0.166667	0	((((((	0	......	1	1	RESCUE ESE	ESE	1	0
{"name": "ESE_9G8 (ESE Site)"	sequence: "GACGAG"	CV: "84.1"	position: "96"}	146	6	152	0.166667	0	((((((	0	.....)	0.833333	0.833333	ESE_9G8	ESE	0.833333	0
{"name": "EIE (ESE Site)"	sequence: "GACGAG"	CV: "NA"	position: "96"}	146	6	152	0.166667	0	((((((	0	.....)	0.833333	0.833333	EIE	ESE	0.833333	0
{"name": "EIE (ESE Site)"	sequence: "ACGAGA"	CV: "NA"	position: "97"}	147	6	153	0.166667	0	((((((	0	....))	0.666667	0.666667	EIE	ESE	0.666667	0
{"name": "PESE (ESE Site)"	sequence: "ACGAGAAG"	CV: "38.27141547663"	position: "97"}	147	8	155	0.125	0	((((((..	0.25	....))))	0.5	0.25	PESE	ESE	0.25	0
{"name": "EIE (ESE Site)"	sequence: "CGAGAA"	CV: "NA"	position: "98"}	148	6	154	0.166667	0	(((((.	0.166667	...)))	0.5	0.333333	EIE	ESE	0.333333	0
{"name": "ESE_SRp40 (ESE Site)"	sequence: "CGAGAAG"	CV: "79.13"	position: "98"}	148	7	155	0.142857	0	(((((..	0.285714	...))))	0.428571	0.142857	ESE_SRp40	ESE	0.142857	0
{"name": "Sironi_motif1 (ESS Site)"	sequence: "CGAGAAGC"	CV: "73.99"	position: "98"}	148	8	156	0	-0.125	(((((...	0.375	...)))))	0.375	0	Sironi_motif1	ESS	0	0
{"name": "ESE_9G8 (ESE Site)"	sequence: "GAGAAG"	CV: "59.33"	position: "99"}	149	6	155	0.166667	0	((((..	0.333333	..))))	0.333333	0	ESE_9G8	ESE	0	0
{"name": "ESS_hnRNPA1 (ESS Site)"	sequence: "GAGAAG"	CV: "66.32"	position: "99"}	149	6	155	0	-0.166667	((((..	0.333333	..))))	0.333333	0	ESS_hnRNPA1	ESS	0	0
{"name": "RESCUE ESE (ESE Site)"	sequence: "GAGAAG"	CV: "NA"	position: "99"}	149	6	155	0.166667	0	((((..	0.333333	..))))	0.333333	0	RESCUE ESE	ESE	0	0
{"name": "EIE (ESE Site)"	sequence: "GAGAAG"	CV: "NA"	position: "99"}	149	6	155	0.166667	0	((((..	0.333333	..))))	0.333333	0	EIE	ESE	0	0
{"name": "RESCUE ESE (ESE Site)"	sequence: "AGAAGC"	CV: "NA"	position: "100"}	150	6	156	0.166667	0	(((...	0.5	.)))))	0.166667	-0.333333	RESCUE ESE	ESE	-0.333333	0
{"name": "EIE (ESE Site)"	sequence: "AGAAGC"	CV: "NA"	position: "100"}	150	6	156	0.166667	0	(((...	0.5	.)))))	0.166667	-0.333333	EIE	ESE	-0.333333	0
{"name": "PESE (ESE Site)"	sequence: "AGAAGCCT"	CV: "34.24236516949"	position: "100"}	150	8	158	0.125	0	(((....(	0.5	.)))))((	0.125	-0.375	PESE	ESE	-0.375	0
{"name": "ESE_9G8 (ESE Site)"	sequence: "GAAGCC"	CV: "80.41"	position: "101"}	151	6	157	0.166667	0	((....	0.666667	)))))(	0	-0.666667	ESE_9G8	ESE	-0.666667	0
{"name": "EIE (ESE Site)"	sequence: "GAAGCC"	CV: "NA"	position: "101"}	151	6	157	0.166667	0	((....	0.666667	)))))(	0	-0.666667	EIE	ESE	-0.666667	0
{"name": "EIE (ESE Site)"	sequence: "AAGCCT"	CV: "NA"	position: "102"}	152	6	158	0.166667	0	(....(	0.666667	))))((	0	-0.666667	EIE	ESE	-0.666667	0
{"name": "EIE (ESE Site)"	sequence: "AGCCTA"	CV: "NA"	position: "103"}	153	6	159	0.166667	0	....((	0.666667	)))(((	0	-0.666667	EIE	ESE	-0.666667	0
{"name": "ESE_9G8 (ESE Site)"	sequence: "GCCTAC"	CV: "61.48"	position: "104"}	154	6	160	0.166667	0	...(((	0.5	))((((	0	-0.5	ESE_9G8	ESE	-0.5	0
{"name": "EIE (ESE Site)"	sequence: "GCCTAC"	CV: "NA"	position: "104"}	154	6	160	0.166667	0	...(((	0.5	))((((	0	-0.5	EIE	ESE	-0.5	0
{"name": "EIE (ESE Site)"	sequence: "CCTACT"	CV: "NA"	position: "105"}	155	6	161	0.166667	0	..((((	0.333333	)(((((	0	-0.333333	EIE	ESE	-0.333333	0
{"name": "EIE (ESE Site)"	sequence: "CTACTT"	CV: "NA"	position: "106"}	156	6	162	0.166667	0	.(((((	0.166667	((((((	0	-0.166667	EIE	ESE	-0.166667	0
{"name": "IIE (ESS Site)"	sequence: "TACTTT"	CV: "NA"	position: "107"}	157	6	163	0	-0.166667	((((((	0	((((((	0	0	IIE	ESS	0	0
{"name": "EIE (ESE Site)"	sequence: "ACTTTG"	CV: "NA"	position: "108"}	158	6	164	0.166667	0	(((((.	0.166667	((((((	0	-0.166667	EIE	ESE	-0.166667	0
{"name": "IIE (ESS Site)"	sequence: "ACTTTG"	CV: "NA"	position: "108"}	158	6	164	0	-0.166667	(((((.	0.166667	((((((	0	-0.166667	IIE	ESS	0	-0.166667
{"name": "EIE (ESE Site)"	sequence: "CTTTGA"	CV: "NA"	position: "109"}	159	6	165	0.166667	0	((((..	0.333333	(((((.	0.166667	-0.166667	EIE	ESE	-0.166667	0
{"name": "IIE (ESS Site)"	sequence: "CTTTGA"	CV: "NA"	position: "109"}	159	6	165	0	-0.166667	((((..	0.333333	(((((.	0.166667	-0.166667	IIE	ESS	0	-0.166667
{"name": "EIE (ESE Site)"	sequence: "TTTGAA"	CV: "NA"	position: "110"}	160	6	166	0.166667	0	(((...	0.5	((((..	0.333333	-0.166667	EIE	ESE	-0.166667	0
{"name": "IIE (ESS Site)"	sequence: "TTTGAA"	CV: "NA"	position: "110"}	160	6	166	0	-0.166667	(((...	0.5	((((..	0.333333	-0.166667	IIE	ESS	0	-0.166667
{"name": "EIE (ESE Site)"	sequence: "TTGAAA"	CV: "NA"	position: "111"}	161	6	167	0.166667	0	((....	0.666667	(((...	0.5	-0.166667	EIE	ESE	-0.166667	0
{"name": "IIE (ESS Site)"	sequence: "TTGAAA"	CV: "NA"	position: "111"}	161	6	167	0	-0.166667	((....	0.666667	(((...	0.5	-0.166667	IIE	ESS	0	-0.166667
{"name": "EIE (ESE Site)"	sequence: "TGAAAA"	CV: "NA"	position: "112"}	162	6	168	0.166667	0	(.....	0.833333	((....	0.666667	-0.166667	EIE	ESE	-0.166667	0
{"name": "ESE_SRp40 (ESE Site)"	sequence: "TGAAAAG"	CV: "82.18"	position: "112"}	162	7	169	0.142857	0	(......	0.857143	((.....	0.714286	-0.142857	ESE_SRp40	ESE	-0.142857	0
{"name": "ESE_9G8 (ESE Site)"	sequence: "GAAAAG"	CV: "64.17"	position: "113"}	163	6	169	0.166667	0	......	1	(.....	0.833333	-0.166667	ESE_9G8	ESE	-0.166667	0
{"name": "RESCUE ESE (ESE Site)"	sequence: "GAAAAG"	CV: "NA"	position: "113"}	163	6	169	0.166667	0	......	1	(.....	0.833333	-0.166667	RESCUE ESE	ESE	-0.166667	0
{"name": "EIE (ESE Site)"	sequence: "GAAAAG"	CV: "NA"	position: "113"}	163	6	169	0.166667	0	......	1	(.....	0.833333	-0.166667	EIE	ESE	-0.166667	0
{"name": "ESE_Tra2 (ESE Site)"	sequence: "AAAAG"	CV: "83.54"	position: "114"}	164	5	169	0.2	0	.....	1	.....	1	0	ESE_Tra2	ESE	0	0
{"name": "EIE (ESE Site)"	sequence: "AAAAGT"	CV: "NA"	position: "114"}	164	6	170	0.166667	0	......	1	.....)	0.833333	-0.166667	EIE	ESE	-0.166667	0
{"name": "ESS_hnRNPA1 (ESS Site)"	sequence: "TAAAGT"	CV: "70.84"	position: "119"}	169	6	175	0	-0.166667	.)))))	0.166667	))))))	0	-0.166667	ESS_hnRNPA1	ESS	0	-0.166667
{"name": "IIE (ESS Site)"	sequence: "AGTAGT"	CV: "NA"	position: "122"}	172	6	178	0	-0.166667	))))..	0.333333	))))).	0.166667	-0.166667	IIE	ESS	0	-0.166667
{"name": "IIE (ESS Site)"	sequence: "GTAGTT"	CV: "NA"	position: "123"}	173	6	179	0	-0.166667	)))...	0.5	))))..	0.333333	-0.166667	IIE	ESS	0	-0.166667
{"name": "Fas ESS (ESS Site)"	sequence: "GTAGTT"	CV: "NA"	position: "123"}	173	6	179	0	-0.166667	)))...	0.5	))))..	0.333333	-0.166667	Fas ESS	ESS	0	-0.166667
{"name": "ESS_hnRNPA1 (ESS Site)"	sequence: "TAGTTG"	CV: "70.6"	position: "124"}	174	6	180	0	-0.166667	))....	0.666667	)))...	0.5	-0.166667	ESS_hnRNPA1	ESS	0	-0.166667
{"name": "IIE (ESS Site)"	sequence: "TAGTTG"	CV: "NA"	position: "124"}	174	6	180	0	-0.166667	))....	0.666667	)))...	0.5	-0.166667	IIE	ESS	0	-0.166667
{"name": "IIE (ESS Site)"	sequence: "AGTTGG"	CV: "NA"	position: "125"}	175	6	181	0	-0.166667	).....	0.833333	))....	0.666667	-0.166667	IIE	ESS	0	-0.166667
{"name": "Sironi_motif2 (ESS Site)"	sequence: "AGTTGGT"	CV: "73.64"	position: "125"}	175	7	182	0	-0.142857	)......	0.857143	)).....	0.714286	-0.142857	Sironi_motif2	ESS	0	-0.142857
{"name": "IIE (ESS Site)"	sequence: "GTTGGT"	CV: "NA"	position: "126"}	176	6	182	0	-0.166667	......	1	).....	0.833333	-0.166667	IIE	ESS	0	-0.166667
{"name": "IIE (ESS Site)"	sequence: "TTGGTA"	CV: "NA"	position: "127"}	177	6	183	0	-0.166667	......	1	......	1	0	IIE	ESS	0	0
{"name": "EIE (ESE Site)"	sequence: "GTACAA"	CV: "NA"	position: "130"}	180	6	186	0.166667	0	......	1	.....(	0.833333	-0.166667	EIE	ESE	-0.166667	0
{"name": "ESE_SRp40 (ESE Site)"	sequence: "GTACAAG"	CV: "79.66"	position: "130"}	180	7	187	0.142857	0	......(	0.857143	.....((	0.714286	-0.142857	ESE_SRp40	ESE	-0.142857	0
{"name": "RESCUE ESE (ESE Site)"	sequence: "TACAAG"	CV: "NA"	position: "131"}	181	6	187	0.166667	0	.....(	0.833333	....((	0.666667	-0.166667	RESCUE ESE	ESE	-0.166667	0
{"name": "EIE (ESE Site)"	sequence: "TACAAG"	CV: "NA"	position: "131"}	181	6	187	0.166667	0	.....(	0.833333	....((	0.666667	-0.166667	EIE	ESE	-0.166667	0

## Sheet: ATXN3 e9 - Analysis
Char	Str 1	Str 2	Mask	Comp	Concat	ESE	ESS	ESE+ESS	S1, ESE	S1, ESS	S1, ESE + ESS	S2,ESE	S2, ESS	S2,ESE + ESS	∆ESE	∆ESS	∆ESE+ESS
1	.	.	.	.	.	0	0	0	0	0	0	0	0	0	0	0	0
2	(	.	.	.	..	0	0	0	0	0	0	0	0	0	0	0	0
3	(	.	.	.	...	0	0	0	0	0	0	0	0	0	0	0	0
4	(	.	.	.	....	0	0	0	0	0	0	0	0	0	0	0	0
5	(	.	.	.	.....	0	0	0	0	0	0	0	0	0	0	0	0
6	.	.	.	.	......	0	0	0	0	0	0	0	0	0	0	0	0
7	.	.	.	.	.......	0	0	0	0	0	0	0	0	0	0	0	0
8	.	.	.	.	........	0	0	0	0	0	0	0	0	0	0	0	0
9	.	.	.	.	.........	0	0	0	0	0	0	0	0	0	0	0	0
10	(	.	.	.	..........	0	0	0	0	0	0	0	0	0	0	0	0
11	(	.	.	.	...........	0	0	0	0	0	0	0	0	0	0	0	0
12	(	.	.	.	............	0	0	0	0	0	0	0	0	0	0	0	0
13	(	.	.	.	.............	0	0	0	0	0	0	0	0	0	0	0	0
14	.	.	.	.	..............	0	0	0	0	0	0	0	0	0	0	0	0
15	(	(	.	(	..............(	0	0	0	0	0	0	0	0	0	0	0	0
16	(	(	.	(	..............((	0	0	0	0	0	0	0	0	0	0	0	0
17	(	(	.	(	..............(((	0	0	0	0	0	0	0	0	0	0	0	0
18	(	(	.	(	..............((((	0	0	0	0	0	0	0	0	0	0	0	0
19	.	.	.	.	..............((((.	0	0	0	0	0	0	0	0	0	0	0	0
20	.	.	.	.	..............((((..	0	0	0	0	0	0	0	0	0	0	0	0
21	.	.	.	.	..............((((...	0	0	0	0	0	0	0	0	0	0	0	0
22	.	.	.	.	..............((((....	0	0	0	0	0	0	0	0	0	0	0	0
23	.	.	.	.	..............((((.....	0	0	0	0	0	0	0	0	0	0	0	0
24	.	.	.	.	..............((((......	0	0	0	0	0	0	0	0	0	0	0	0
25	)	)	.	)	..............((((......)	0	0	0	0	0	0	0	0	0	0	0	0
26	)	)	.	)	..............((((......))	0	0	0	0	0	0	0	0	0	0	0	0
27	)	)	.	)	..............((((......)))	0	0	0	0	0	0	0	0	0	0	0	0
28	)	)	.	)	..............((((......))))	0	0	0	0	0	0	0	0	0	0	0	0
29	.	.	.	.	..............((((......)))).	0	0	0	0	0	0	0	0	0	0	0	0
30	.	.	.	.	..............((((......))))..	0	0	0	0	0	0	0	0	0	0	0	0
31	.	.	.	.	..............((((......))))...	0	0	0	0	0	0	0	0	0	0	0	0
32	.	.	.	.	..............((((......))))....	0	0	0	0	0	0	0	0	0	0	0	0
33	)	.	.	.	..............((((......)))).....	0	0	0	0	0	0	0	0	0	0	0	0
34	)	.	.	.	..............((((......))))......	0	0	0	0	0	0	0	0	0	0	0	0
35	)	.	.	.	..............((((......)))).......	0	0	0	0	0	0	0	0	0	0	0	0
36	)	.	.	.	..............((((......))))........	0	0	0	0	0	0	0	0	0	0	0	0
37	(	.	.	.	..............((((......)))).........	0	0	0	0	0	0	0	0	0	0	0	0
38	(	.	.	.	..............((((......))))..........	0	0	0	0	0	0	0	0	0	0	0	0
39	(	.	.	.	..............((((......))))...........	0	0	0	0	0	0	0	0	0	0	0	0
40	(	.	.	.	..............((((......))))............	0	0	0	0	0	0	0	0	0	0	0	0
41	.	.	.	.	..............((((......)))).............	0	0	0	0	0	0	0	0	0	0	0	0
42	(	.	.	.	..............((((......))))..............	0	0	0	0	0	0	0	0	0	0	0	0
43	(	.	.	.	..............((((......))))...............	0	0	0	0	0	0	0	0	0	0	0	0
44	.	.	.	.	..............((((......))))................	0	0	0	0	0	0	0	0	0	0	0	0
45	(	.	.	.	..............((((......)))).................	0	0	0	0	0	0	0	0	0	0	0	0
46	(	.	.	.	..............((((......))))..................	0	0	0	0	0	0	0	0	0	0	0	0
47	(	.	.	.	..............((((......))))...................	0	0	0	0	0	0	0	0	0	0	0	0
48	(	.	.	.	..............((((......))))....................	0	0	0	0	0	0	0	0	0	0	0	0
49	.	.	.	.	..............((((......)))).....................	0	0	0	0	0	0	0	0	0	0	0	0
50	(	(	.	(	..............((((......)))).....................(	0	0	0	0	0	0	0	0	0	0	0	0
51	(	(	.	(	..............((((......)))).....................((	0	-0.166667	-0.166667	0	0	0	0	0	0	0	0	0
52	(	(	.	(	..............((((......)))).....................(((	0	-0.47619	-0.47619	0	0	0	0	0	0	0	0	0
53	.	(	.	(	..............((((......)))).....................((((	0	-0.642857	-0.642857	0	-0.642857	-0.642857	0	0	0	0	0.642857	0.642857
54	(	(	.	(	..............((((......)))).....................(((((	0	-0.934524	-0.934524	0	0	0	0	0	0	0	0	0
55	(	(	.	(	..............((((......)))).....................((((((	0	-1.22619	-1.22619	0	0	0	0	0	0	0	0	0
56	(	(	.	(	..............((((......)))).....................(((((((	0	-1.39286	-1.39286	0	0	0	0	0	0	0	0	0
57	(	(	.	(	..............((((......)))).....................((((((((	0	-1.39286	-1.39286	0	0	0	0	0	0	0	0	0
58	(	(	.	(	..............((((......)))).....................(((((((((	0	-1.55952	-1.55952	0	0	0	0	0	0	0	0	0
59	(	(	.	(	..............((((......)))).....................((((((((((	0	-1.54167	-1.54167	0	0	0	0	0	0	0	0	0
60	(	(	.	(	..............((((......)))).....................(((((((((((	0	-1.83333	-1.83333	0	0	0	0	0	0	0	0	0
61	.	(	.	(	..............((((......)))).....................((((((((((((	0	-2	-2	0	-2	-2	0	0	0	0	2	2
62	(	(	.	(	..............((((......)))).....................(((((((((((((	0	-1.875	-1.875	0	0	0	0	0	0	0	0	0
63	(	(	.	(	..............((((......)))).....................((((((((((((((	0.125	-1.75	-1.625	0	0	0	0	0	0	0	0	0
64	(	.	.	.	..............((((......)))).....................((((((((((((((.	0.125	-1.58333	-1.45833	0	0	0	0.125	-1.58333	-1.45833	0.125	-1.58333	-1.45833
65	(	.	.	.	..............((((......)))).....................((((((((((((((..	0.267857	-1.41667	-1.14881	0	0	0	0.267857	-1.41667	-1.14881	0.267857	-1.41667	-1.14881
66	(	.	.	.	..............((((......)))).....................((((((((((((((...	0.267857	-1.08333	-0.815476	0	0	0	0.267857	-1.08333	-0.815476	0.267857	-1.08333	-0.815476
67	(	.	.	.	..............((((......)))).....................((((((((((((((....	0.267857	-0.625	-0.357143	0	0	0	0.267857	-0.625	-0.357143	0.267857	-0.625	-0.357143
68	.	.	.	.	..............((((......)))).....................((((((((((((((.....	0.267857	-0.5	-0.232143	0.267857	-0.5	-0.232143	0.267857	-0.5	-0.232143	0	0	0
69	(	(	.	(	..............((((......)))).....................((((((((((((((.....(	0.267857	-0.5	-0.232143	0	0	0	0	0	0	0	0	0
70	(	(	.	(	..............((((......)))).....................((((((((((((((.....((	0.267857	-0.666667	-0.39881	0	0	0	0	0	0	0	0	0
71	(	(	.	(	..............((((......)))).....................((((((((((((((.....(((	0.142857	-1	-0.857143	0	0	0	0	0	0	0	0	0
72	(	(	.	(	..............((((......)))).....................((((((((((((((.....((((	0	-1.16667	-1.16667	0	0	0	0	0	0	0	0	0
73	(	(	.	(	..............((((......)))).....................((((((((((((((.....(((((	0.125	-1.29167	-1.16667	0	0	0	0	0	0	0	0	0
74	(	(	.	(	..............((((......)))).....................((((((((((((((.....((((((	0.125	-1.125	-1	0	0	0	0	0	0	0	0	0
75	(	(	.	(	..............((((......)))).....................((((((((((((((.....(((((((	0.125	-0.958333	-0.833333	0	0	0	0	0	0	0	0	0
76	(	(	.	(	..............((((......)))).....................((((((((((((((.....((((((((	0.125	-0.625	-0.5	0	0	0	0	0	0	0	0	0
77	.	.	.	.	..............((((......)))).....................((((((((((((((.....((((((((.	0.291667	-0.416667	-0.125	0.291667	-0.416667	-0.125	0.291667	-0.416667	-0.125	0	0	0
78	.	.	.	.	..............((((......)))).....................((((((((((((((.....((((((((..	0.625	-0.416667	0.208333	0.625	-0.416667	0.208333	0.625	-0.416667	0.208333	0	0	0
79	.	.	.	.	..............((((......)))).....................((((((((((((((.....((((((((...	0.958333	-0.416667	0.541667	0.958333	-0.416667	0.541667	0.958333	-0.416667	0.541667	0	0	0
80	.	.	.	.	..............((((......)))).....................((((((((((((((.....((((((((....	1.29167	-0.416667	0.875	1.29167	-0.416667	0.875	1.29167	-0.416667	0.875	0	0	0
81	.	.	.	.	..............((((......)))).....................((((((((((((((.....((((((((.....	1.16667	-0.291667	0.875	1.16667	-0.291667	0.875	1.16667	-0.291667	0.875	0	0	0
82	)	)	.	)	..............((((......)))).....................((((((((((((((.....((((((((.....)	1.53333	-0.291667	1.24167	0	0	0	0	0	0	0	0	0
83	)	)	.	)	..............((((......)))).....................((((((((((((((.....((((((((.....))	1.36667	-0.291667	1.075	0	0	0	0	0	0	0	0	0
84	)	)	.	)	..............((((......)))).....................((((((((((((((.....((((((((.....)))	1.03333	-0.125	0.908333	0	0	0	0	0	0	0	0	0
85	.	.	.	.	..............((((......)))).....................((((((((((((((.....((((((((.....))).	0.7	0	0.7	0.7	0	0.7	0.7	0	0.7	0	0	0
86	)	)	.	)	..............((((......)))).....................((((((((((((((.....((((((((.....))).)	0.366667	-0.125	0.241667	0	0	0	0	0	0	0	0	0
87	)	)	.	)	..............((((......)))).....................((((((((((((((.....((((((((.....))).))	0.291667	-0.125	0.166667	0	0	0	0	0	0	0	0	0
88	)	)	.	)	..............((((......)))).....................((((((((((((((.....((((((((.....))).)))	0.267857	-0.125	0.142857	0	0	0	0	0	0	0	0	0
89	)	)	.	)	..............((((......)))).....................((((((((((((((.....((((((((.....))).))))	0.845238	-0.125	0.720238	0	0	0	0	0	0	0	0	0
90	)	)	.	)	..............((((......)))).....................((((((((((((((.....((((((((.....))).)))))	1.17857	-0.125	1.05357	0	0	0	0	0	0	0	0	0
91	.	)	.	)	..............((((......)))).....................((((((((((((((.....((((((((.....))).))))))	1.67857	-0.25	1.42857	1.67857	-0.25	1.42857	0	0	0	-1.67857	0.25	-1.42857
92	)	)	.	)	..............((((......)))).....................((((((((((((((.....((((((((.....))).)))))))	2.04524	-0.25	1.79524	0	0	0	0	0	0	0	0	0
93	)	)	.	)	..............((((......)))).....................((((((((((((((.....((((((((.....))).))))))))	2.2119	-0.25	1.9619	0	0	0	0	0	0	0	0	0
94	)	)	.	)	..............((((......)))).....................((((((((((((((.....((((((((.....))).)))))))))	2.54524	-0.125	2.42024	0	0	0	0	0	0	0	0	0
95	)	)	.	)	..............((((......)))).....................((((((((((((((.....((((((((.....))).))))))))))	2.27738	-0.125	2.15238	0	0	0	0	0	0	0	0	0
96	)	)	.	)	..............((((......)))).....................((((((((((((((.....((((((((.....))).)))))))))))	1.99167	-0.291667	1.7	0	0	0	0	0	0	0	0	0
97	)	)	.	)	..............((((......)))).....................((((((((((((((.....((((((((.....))).))))))))))))	1.33333	-0.291667	1.04167	0	0	0	0	0	0	0	0	0
98	.	)	.	)	..............((((......)))).....................((((((((((((((.....((((((((.....))).)))))))))))))	1.30952	-0.291667	1.01786	1.30952	-0.291667	1.01786	0	0	0	-1.30952	0.291667	-1.01786
99	)	)	.	)	..............((((......)))).....................((((((((((((((.....((((((((.....))).))))))))))))))	1.26786	-0.166667	1.10119	0	0	0	0	0	0	0	0	0
100	)	)	.	)	..............((((......)))).....................((((((((((((((.....((((((((.....))).)))))))))))))))	1.07738	-0.166667	0.910714	0	0	0	0	0	0	0	0	0
101	)	)	.	)	..............((((......)))).....................((((((((((((((.....((((((((.....))).))))))))))))))))	1.22024	-0.291667	0.928571	0	0	0	0	0	0	0	0	0
102	)	)	.	)	..............((((......)))).....................((((((((((((((.....((((((((.....))).)))))))))))))))))	1.22024	-0.25	0.970238	0	0	0	0	0	0	0	0	0
103	)	)	.	)	..............((((......)))).....................((((((((((((((.....((((((((.....))).))))))))))))))))))	1.50595	-0.25	1.25595	0	0	0	0	0	0	0	0	0
104	)	)	.	)	..............((((......)))).....................((((((((((((((.....((((((((.....))).)))))))))))))))))))	1.96429	-0.25	1.71429	0	0	0	0	0	0	0	0	0
105	)	.	.	.	..............((((......)))).....................((((((((((((((.....((((((((.....))).))))))))))))))))))).	2.15476	-0.25	1.90476	0	0	0	2.15476	-0.25	1.90476	2.15476	-0.25	1.90476
106	)	.	.	.	..............((((......)))).....................((((((((((((((.....((((((((.....))).)))))))))))))))))))..	2.44643	-0.25	2.19643	0	0	0	2.44643	-0.25	2.19643	2.44643	-0.25	2.19643
107	)	.	.	.	..............((((......)))).....................((((((((((((((.....((((((((.....))).)))))))))))))))))))...	2.17857	-0.375	1.80357	0	0	0	2.17857	-0.375	1.80357	2.17857	-0.375	1.80357
108	)	.	x	|	..............((((......)))).....................((((((((((((((.....((((((((.....))).)))))))))))))))))))...|	1.84524	-0.375	1.47024	0	0	0	0	0	0	0	0	0
109	.	.	x	|	..............((((......)))).....................((((((((((((((.....((((((((.....))).)))))))))))))))))))...||	1.67857	-0.25	1.42857	1.67857	-0.25	1.42857	0	0	0	-1.67857	0.25	-1.42857
110	)	.	x	|	..............((((......)))).....................((((((((((((((.....((((((((.....))).)))))))))))))))))))...|||	1.05952	-0.291667	0.767857	0	0	0	0	0	0	0	0	0
111	)	.	x	|	..............((((......)))).....................((((((((((((((.....((((((((.....))).)))))))))))))))))))...||||	0.72619	-0.291667	0.434524	0	0	0	0	0	0	0	0	0
112	)	.	x	|	..............((((......)))).....................((((((((((((((.....((((((((.....))).)))))))))))))))))))...|||||	0.434524	-0.291667	0.142857	0	0	0	0	0	0	0	0	0
113	)	.	x	|	..............((((......)))).....................((((((((((((((.....((((((((.....))).)))))))))))))))))))...||||||	0.434524	-0.291667	0.142857	0	0	0	0	0	0	0	0	0
114	.	.	x	|	..............((((......)))).....................((((((((((((((.....((((((((.....))).)))))))))))))))))))...|||||||	0.47619	-0.291667	0.184524	0.47619	-0.291667	0.184524	0	0	0	-0.47619	0.291667	-0.184524
115	)	.	x	|	..............((((......)))).....................((((((((((((((.....((((((((.....))).)))))))))))))))))))...||||||||	0.5	-0.166667	0.333333	0	0	0	0	0	0	0	0	0
116	)	.	x	|	..............((((......)))).....................((((((((((((((.....((((((((.....))).)))))))))))))))))))...|||||||||	0.5	0	0.5	0	0	0	0	0	0	0	0	0
117	.	.	x	|	..............((((......)))).....................((((((((((((((.....((((((((.....))).)))))))))))))))))))...||||||||||	0.5	0	0.5	0.5	0	0.5	0	0	0	-0.5	0	-0.5
118	)	.	x	|	..............((((......)))).....................((((((((((((((.....((((((((.....))).)))))))))))))))))))...|||||||||||	0.5	0	0.5	0	0	0	0	0	0	0	0	0
119	)	.	x	|	..............((((......)))).....................((((((((((((((.....((((((((.....))).)))))))))))))))))))...||||||||||||	0.5	0	0.5	0	0	0	0	0	0	0	0	0
120	)	.	x	|	..............((((......)))).....................((((((((((((((.....((((((((.....))).)))))))))))))))))))...|||||||||||||	0.5	0	0.5	0	0	0	0	0	0	0	0	0
121	)	.	x	|	..............((((......)))).....................((((((((((((((.....((((((((.....))).)))))))))))))))))))...||||||||||||||	0.5	0	0.5	0	0	0	0	0	0	0	0	0
122	.	.	x	|	..............((((......)))).....................((((((((((((((.....((((((((.....))).)))))))))))))))))))...|||||||||||||||	0.642857	-0.166667	0.47619	0.642857	-0.166667	0.47619	0	0	0	-0.642857	0.166667	-0.47619
123	.	.	x	|	..............((((......)))).....................((((((((((((((.....((((((((.....))).)))))))))))))))))))...||||||||||||||||	0.809524	-0.166667	0.642857	0.809524	-0.166667	0.642857	0	0	0	-0.809524	0.166667	-0.642857
124	.	.	x	|	..............((((......)))).....................((((((((((((((.....((((((((.....))).)))))))))))))))))))...|||||||||||||||||	0.97619	-0.166667	0.809524	0.97619	-0.166667	0.809524	0	0	0	-0.97619	0.166667	-0.809524
125	(	.	x	|	..............((((......)))).....................((((((((((((((.....((((((((.....))).)))))))))))))))))))...||||||||||||||||||	0.97619	-0.166667	0.809524	0	0	0	0	0	0	0	0	0
126	(	.	x	|	..............((((......)))).....................((((((((((((((.....((((((((.....))).)))))))))))))))))))...|||||||||||||||||||	1.10119	-0.166667	0.934524	0	0	0	0	0	0	0	0	0
127	(	.	x	|	..............((((......)))).....................((((((((((((((.....((((((((.....))).)))))))))))))))))))...||||||||||||||||||||	1.53571	-0.291667	1.24405	0	0	0	0	0	0	0	0	0
128	(	.	x	|	..............((((......)))).....................((((((((((((((.....((((((((.....))).)))))))))))))))))))...|||||||||||||||||||||	2.27976	-0.125	2.15476	0	0	0	0	0	0	0	0	0
129	.	.	x	|	..............((((......)))).....................((((((((((((((.....((((((((.....))).)))))))))))))))))))...||||||||||||||||||||||	2.42857	-0.125	2.30357	2.42857	-0.125	2.30357	0	0	0	-2.42857	0.125	-2.30357
130	(	.	x	|	..............((((......)))).....................((((((((((((((.....((((((((.....))).)))))))))))))))))))...|||||||||||||||||||||||	2.7619	-0.25	2.5119	0	0	0	0	0	0	0	0	0
131	(	.	x	|	..............((((......)))).....................((((((((((((((.....((((((((.....))).)))))))))))))))))))...||||||||||||||||||||||||	2.9619	-0.416667	2.54524	0	0	0	0	0	0	0	0	0
132	(	.	x	|	..............((((......)))).....................((((((((((((((.....((((((((.....))).)))))))))))))))))))...|||||||||||||||||||||||||	2.79524	-0.416667	2.37857	0	0	0	0	0	0	0	0	0
133	.	.	.	.	..............((((......)))).....................((((((((((((((.....((((((((.....))).)))))))))))))))))))...|||||||||||||||||||||||||.	2.4619	-0.583333	1.87857	2.4619	-0.583333	1.87857	2.4619	-0.583333	1.87857	0	0	0
134	.	.	.	.	..............((((......)))).....................((((((((((((((.....((((((((.....))).)))))))))))))))))))...|||||||||||||||||||||||||..	1.86071	-0.583333	1.27738	1.86071	-0.583333	1.27738	1.86071	-0.583333	1.27738	0	0	0
135	.	(	.	(	..............((((......)))).....................((((((((((((((.....((((((((.....))).)))))))))))))))))))...|||||||||||||||||||||||||..(	1.28333	-0.458333	0.825	1.28333	-0.458333	0.825	0	0	0	-1.28333	0.458333	-0.825
136	.	(	.	(	..............((((......)))).....................((((((((((((((.....((((((((.....))).)))))))))))))))))))...|||||||||||||||||||||||||..((	0.60119	-0.458333	0.142857	0.60119	-0.458333	0.142857	0	0	0	-0.60119	0.458333	-0.142857
137	)	(	.	(	..............((((......)))).....................((((((((((((((.....((((((((.....))).)))))))))))))))))))...|||||||||||||||||||||||||..(((	0.47619	-0.291667	0.184524	0	0	0	0	0	0	0	0	0
138	)	(	.	(	..............((((......)))).....................((((((((((((((.....((((((((.....))).)))))))))))))))))))...|||||||||||||||||||||||||..((((	0.47619	-0.166667	0.309524	0	0	0	0	0	0	0	0	0
139	)	(	.	(	..............((((......)))).....................((((((((((((((.....((((((((.....))).)))))))))))))))))))...|||||||||||||||||||||||||..(((((	0.761905	0	0.761905	0	0	0	0	0	0	0	0	0
140	.	.	.	.	..............((((......)))).....................((((((((((((((.....((((((((.....))).)))))))))))))))))))...|||||||||||||||||||||||||..(((((.	1.22024	-0.142857	1.07738	1.22024	-0.142857	1.07738	1.22024	-0.142857	1.07738	0	0	0
141	)	.	.	.	..............((((......)))).....................((((((((((((((.....((((((((.....))).)))))))))))))))))))...|||||||||||||||||||||||||..(((((..	1.55357	-0.267857	1.28571	0	0	0	1.55357	-0.267857	1.28571	1.55357	-0.267857	1.28571
142	)	.	.	.	..............((((......)))).....................((((((((((((((.....((((((((.....))).)))))))))))))))))))...|||||||||||||||||||||||||..(((((...	2.0869	-0.434524	1.65238	0	0	0	2.0869	-0.434524	1.65238	2.0869	-0.434524	1.65238
143	)	.	.	.	..............((((......)))).....................((((((((((((((.....((((((((.....))).)))))))))))))))))))...|||||||||||||||||||||||||..(((((....	2.11071	-0.559524	1.55119	0	0	0	2.11071	-0.559524	1.55119	2.11071	-0.559524	1.55119
144	)	.	.	.	..............((((......)))).....................((((((((((((((.....((((((((.....))).)))))))))))))))))))...|||||||||||||||||||||||||..(((((.....	2.5631	-0.559524	2.00357	0	0	0	2.5631	-0.559524	2.00357	2.5631	-0.559524	2.00357
145	(	.	.	.	..............((((......)))).....................((((((((((((((.....((((((((.....))).)))))))))))))))))))...|||||||||||||||||||||||||..(((((......	2.72976	-0.559524	2.17024	0	0	0	2.72976	-0.559524	2.17024	2.72976	-0.559524	2.17024
146	(	.	.	.	..............((((......)))).....................((((((((((((((.....((((((((.....))).)))))))))))))))))))...|||||||||||||||||||||||||..(((((.......	2.44405	-0.559524	1.88452	0	0	0	2.44405	-0.559524	1.88452	2.44405	-0.559524	1.88452
147	(	.	.	.	..............((((......)))).....................((((((((((((((.....((((((((.....))).)))))))))))))))))))...|||||||||||||||||||||||||..(((((........	2.03571	-0.416667	1.61905	0	0	0	2.03571	-0.416667	1.61905	2.03571	-0.416667	1.61905
148	(	.	.	.	..............((((......)))).....................((((((((((((((.....((((((((.....))).)))))))))))))))))))...|||||||||||||||||||||||||..(((((.........	1.8869	-0.375	1.5119	0	0	0	1.8869	-0.375	1.5119	1.8869	-0.375	1.5119
149	(	.	.	.	..............((((......)))).....................((((((((((((((.....((((((((.....))).)))))))))))))))))))...|||||||||||||||||||||||||..(((((..........	2.05357	-0.416667	1.6369	0	0	0	2.05357	-0.416667	1.6369	2.05357	-0.416667	1.6369
150	(	.	.	.	..............((((......)))).....................((((((((((((((.....((((((((.....))).)))))))))))))))))))...|||||||||||||||||||||||||..(((((...........	2.34524	-0.416667	1.92857	0	0	0	2.34524	-0.416667	1.92857	2.34524	-0.416667	1.92857
151	(	)	.	)	..............((((......)))).....................((((((((((((((.....((((((((.....))).)))))))))))))))))))...|||||||||||||||||||||||||..(((((...........)	2.22619	-0.291667	1.93452	0	0	0	0	0	0	0	0	0
152	(	)	.	)	..............((((......)))).....................((((((((((((((.....((((((((.....))).)))))))))))))))))))...|||||||||||||||||||||||||..(((((...........))	2.05952	-0.291667	1.76786	0	0	0	0	0	0	0	0	0
153	.	)	.	)	..............((((......)))).....................((((((((((((((.....((((((((.....))).)))))))))))))))))))...|||||||||||||||||||||||||..(((((...........)))	2.05952	-0.291667	1.76786	2.05952	-0.291667	1.76786	0	0	0	-2.05952	0.291667	-1.76786
154	.	)	.	)	..............((((......)))).....................((((((((((((((.....((((((((.....))).)))))))))))))))))))...|||||||||||||||||||||||||..(((((...........))))	2.22619	-0.291667	1.93452	2.22619	-0.291667	1.93452	0	0	0	-2.22619	0.291667	-1.93452
155	.	)	.	)	..............((((......)))).....................((((((((((((((.....((((((((.....))).)))))))))))))))))))...|||||||||||||||||||||||||..(((((...........)))))	1.625	-0.125	1.5	1.625	-0.125	1.5	0	0	0	-1.625	0.125	-1.5
156	.	(	.	(	..............((((......)))).....................((((((((((((((.....((((((((.....))).)))))))))))))))))))...|||||||||||||||||||||||||..(((((...........)))))(	1.45833	0	1.45833	1.45833	0	1.45833	0	0	0	-1.45833	0	-1.45833
157	(	(	.	(	..............((((......)))).....................((((((((((((((.....((((((((.....))).)))))))))))))))))))...|||||||||||||||||||||||||..(((((...........)))))((	1.125	-0.166667	0.958333	0	0	0	0	0	0	0	0	0
158	(	(	.	(	..............((((......)))).....................((((((((((((((.....((((((((.....))).)))))))))))))))))))...|||||||||||||||||||||||||..(((((...........)))))(((	1	-0.333333	0.666667	0	0	0	0	0	0	0	0	0
159	(	(	.	(	..............((((......)))).....................((((((((((((((.....((((((((.....))).)))))))))))))))))))...|||||||||||||||||||||||||..(((((...........)))))((((	1	-0.5	0.5	0	0	0	0	0	0	0	0	0
160	(	(	.	(	..............((((......)))).....................((((((((((((((.....((((((((.....))).)))))))))))))))))))...|||||||||||||||||||||||||..(((((...........)))))(((((	0.833333	-0.666667	0.166667	0	0	0	0	0	0	0	0	0
161	(	(	.	(	..............((((......)))).....................((((((((((((((.....((((((((.....))).)))))))))))))))))))...|||||||||||||||||||||||||..(((((...........)))))((((((	0.833333	-0.833333	6.21725e-15	0	0	0	0	0	0	0	0	0
162	(	(	.	(	..............((((......)))).....................((((((((((((((.....((((((((.....))).)))))))))))))))))))...|||||||||||||||||||||||||..(((((...........)))))(((((((	0.97619	-0.833333	0.142857	0	0	0	0	0	0	0	0	0
163	.	(	.	(	..............((((......)))).....................((((((((((((((.....((((((((.....))).)))))))))))))))))))...|||||||||||||||||||||||||..(((((...........)))))((((((((	1.47619	-0.666667	0.809524	1.47619	-0.666667	0.809524	0	0	0	-1.47619	0.666667	-0.809524
164	.	.	.	.	..............((((......)))).....................((((((((((((((.....((((((((.....))).)))))))))))))))))))...|||||||||||||||||||||||||..(((((...........)))))((((((((.	1.67619	-0.5	1.17619	1.67619	-0.5	1.17619	1.67619	-0.5	1.17619	0	0	0
165	.	.	.	.	..............((((......)))).....................((((((((((((((.....((((((((.....))).)))))))))))))))))))...|||||||||||||||||||||||||..(((((...........)))))((((((((..	1.50952	-0.333333	1.17619	1.50952	-0.333333	1.17619	1.50952	-0.333333	1.17619	0	0	0
166	.	.	.	.	..............((((......)))).....................((((((((((((((.....((((((((.....))).)))))))))))))))))))...|||||||||||||||||||||||||..(((((...........)))))((((((((...	1.34286	-0.166667	1.17619	1.34286	-0.166667	1.17619	1.34286	-0.166667	1.17619	0	0	0
167	.	.	.	.	..............((((......)))).....................((((((((((((((.....((((((((.....))).)))))))))))))))))))...|||||||||||||||||||||||||..(((((...........)))))((((((((....	1.17619	0	1.17619	1.17619	0	1.17619	1.17619	0	1.17619	0	0	0
168	.	.	.	.	..............((((......)))).....................((((((((((((((.....((((((((.....))).)))))))))))))))))))...|||||||||||||||||||||||||..(((((...........)))))((((((((.....	1.00952	0	1.00952	1.00952	0	1.00952	1.00952	0	1.00952	0	0	0
169	.	)	.	)	..............((((......)))).....................((((((((((((((.....((((((((.....))).)))))))))))))))))))...|||||||||||||||||||||||||..(((((...........)))))((((((((.....)	0.166667	-0.166667	1.77636e-15	0.166667	-0.166667	1.77636e-15	0	0	0	-0.166667	0.166667	-1.77636e-15
170	)	)	.	)	..............((((......)))).....................((((((((((((((.....((((((((.....))).)))))))))))))))))))...|||||||||||||||||||||||||..(((((...........)))))((((((((.....))	0	-0.166667	-0.166667	0	0	0	0	0	0	0	0	0
171	)	)	.	)	..............((((......)))).....................((((((((((((((.....((((((((.....))).)))))))))))))))))))...|||||||||||||||||||||||||..(((((...........)))))((((((((.....)))	0	-0.166667	-0.166667	0	0	0	0	0	0	0	0	0
172	)	)	.	)	..............((((......)))).....................((((((((((((((.....((((((((.....))).)))))))))))))))))))...|||||||||||||||||||||||||..(((((...........)))))((((((((.....))))	0	-0.333333	-0.333333	0	0	0	0	0	0	0	0	0
173	)	)	.	)	..............((((......)))).....................((((((((((((((.....((((((((.....))).)))))))))))))))))))...|||||||||||||||||||||||||..(((((...........)))))((((((((.....)))))	0	-0.666667	-0.666667	0	0	0	0	0	0	0	0	0
174	)	)	.	)	..............((((......)))).....................((((((((((((((.....((((((((.....))).)))))))))))))))))))...|||||||||||||||||||||||||..(((((...........)))))((((((((.....))))))	0	-1	-1	0	0	0	0	0	0	0	0	0
175	)	)	.	)	..............((((......)))).....................((((((((((((((.....((((((((.....))).)))))))))))))))))))...|||||||||||||||||||||||||..(((((...........)))))((((((((.....)))))))	0	-1.14286	-1.14286	0	0	0	0	0	0	0	0	0
176	.	)	.	)	..............((((......)))).....................((((((((((((((.....((((((((.....))).)))))))))))))))))))...|||||||||||||||||||||||||..(((((...........)))))((((((((.....))))))))	0	-1.30952	-1.30952	0	-1.30952	-1.30952	0	0	0	0	1.30952	1.30952
177	.	.	.	.	..............((((......)))).....................((((((((((((((.....((((((((.....))).)))))))))))))))))))...|||||||||||||||||||||||||..(((((...........)))))((((((((.....)))))))).	0	-1.47619	-1.47619	0	-1.47619	-1.47619	0	-1.47619	-1.47619	0	0	0
178	.	.	.	.	..............((((......)))).....................((((((((((((((.....((((((((.....))).)))))))))))))))))))...|||||||||||||||||||||||||..(((((...........)))))((((((((.....))))))))..	0	-1.30952	-1.30952	0	-1.30952	-1.30952	0	-1.30952	-1.30952	0	0	0
179	.	.	.	.	..............((((......)))).....................((((((((((((((.....((((((((.....))).)))))))))))))))))))...|||||||||||||||||||||||||..(((((...........)))))((((((((.....))))))))...	0	-0.97619	-0.97619	0	-0.97619	-0.97619	0	-0.97619	-0.97619	0	0	0
180	.	.	.	.	..............((((......)))).....................((((((((((((((.....((((((((.....))).)))))))))))))))))))...|||||||||||||||||||||||||..(((((...........)))))((((((((.....))))))))....	0.309524	-0.642857	-0.333333	0.309524	-0.642857	-0.333333	0.309524	-0.642857	-0.333333	0	0	0
181	.	.	.	.	..............((((......)))).....................((((((((((((((.....((((((((.....))).)))))))))))))))))))...|||||||||||||||||||||||||..(((((...........)))))((((((((.....)))))))).....	0.642857	-0.47619	0.166667	0.642857	-0.47619	0.166667	0.642857	-0.47619	0.166667	0	0	0
182	.	.	.	.	..............((((......)))).....................((((((((((((((.....((((((((.....))).)))))))))))))))))))...|||||||||||||||||||||||||..(((((...........)))))((((((((.....))))))))......	0.642857	-0.166667	0.47619	0.642857	-0.166667	0.47619	0.642857	-0.166667	0.47619	0	0	0
183	.	.	.	.	..............((((......)))).....................((((((((((((((.....((((((((.....))).)))))))))))))))))))...|||||||||||||||||||||||||..(((((...........)))))((((((((.....)))))))).......	0.642857	0	0.642857	0.642857	0	0.642857	0.642857	0	0.642857	0	0	0
184	.	.	.	.	..............((((......)))).....................((((((((((((((.....((((((((.....))).)))))))))))))))))))...|||||||||||||||||||||||||..(((((...........)))))((((((((.....))))))))........	0.642857	0	0.642857	0.642857	0	0.642857	0.642857	0	0.642857	0	0	0
185	.	(	.	(	..............((((......)))).....................((((((((((((((.....((((((((.....))).)))))))))))))))))))...|||||||||||||||||||||||||..(((((...........)))))((((((((.....))))))))........(	0.642857	0	0.642857	0.642857	0	0.642857	0	0	0	-0.642857	0	-0.642857
186	(	(	.	(	..............((((......)))).....................((((((((((((((.....((((((((.....))).)))))))))))))))))))...|||||||||||||||||||||||||..(((((...........)))))((((((((.....))))))))........((	0.47619	0	0.47619	0	0	0	0	0	0	0	0	0
187	(	(	.	(	..............((((......)))).....................((((((((((((((.....((((((((.....))).)))))))))))))))))))...|||||||||||||||||||||||||..(((((...........)))))((((((((.....))))))))........(((	0	0	0	0	0	0	0	0	0	0	0	0
188	(	(	.	(	..............((((......)))).....................((((((((((((((.....((((((((.....))).)))))))))))))))))))...|||||||||||||||||||||||||..(((((...........)))))((((((((.....))))))))........((((	0	0	0	0	0	0	0	0	0	0	0	0
189	(	(	.	(	..............((((......)))).....................((((((((((((((.....((((((((.....))).)))))))))))))))))))...|||||||||||||||||||||||||..(((((...........)))))((((((((.....))))))))........(((((	0	0	0	0	0	0	0	0	0	0	0	0
190	(	(	.	(	..............((((......)))).....................((((((((((((((.....((((((((.....))).)))))))))))))))))))...|||||||||||||||||||||||||..(((((...........)))))((((((((.....))))))))........((((((	0	0	0	0	0	0	0	0	0	0	0	0
191	(	(	.	(	..............((((......)))).....................((((((((((((((.....((((((((.....))).)))))))))))))))))))...|||||||||||||||||||||||||..(((((...........)))))((((((((.....))))))))........(((((((	0	0	0	0	0	0	0	0	0	0	0	0
192	(	(	.	(	..............((((......)))).....................((((((((((((((.....((((((((.....))).)))))))))))))))))))...|||||||||||||||||||||||||..(((((...........)))))((((((((.....))))))))........((((((((	0	0	0	0	0	0	0	0	0	0	0	0
193	(	(	.	(	..............((((......)))).....................((((((((((((((.....((((((((.....))).)))))))))))))))))))...|||||||||||||||||||||||||..(((((...........)))))((((((((.....))))))))........(((((((((	0	0	0	0	0	0	0	0	0	0	0	0
194	(	(	.	(	..............((((......)))).....................((((((((((((((.....((((((((.....))).)))))))))))))))))))...|||||||||||||||||||||||||..(((((...........)))))((((((((.....))))))))........((((((((((	0	0	0	0	0	0	0	0	0	0	0	0
195	(	(	.	(	..............((((......)))).....................((((((((((((((.....((((((((.....))).)))))))))))))))))))...|||||||||||||||||||||||||..(((((...........)))))((((((((.....))))))))........(((((((((((	0	0	0	0	0	0	0	0	0	0	0	0
196	.	.	.	.	..............((((......)))).....................((((((((((((((.....((((((((.....))).)))))))))))))))))))...|||||||||||||||||||||||||..(((((...........)))))((((((((.....))))))))........(((((((((((.	0	0	0	0	0	0	0	0	0	0	0	0
197	.	(	.	(	..............((((......)))).....................((((((((((((((.....((((((((.....))).)))))))))))))))))))...|||||||||||||||||||||||||..(((((...........)))))((((((((.....))))))))........(((((((((((.(	0	0	0	0	0	0	0	0	0	0	0	0
198	(	(	.	(	..............((((......)))).....................((((((((((((((.....((((((((.....))).)))))))))))))))))))...|||||||||||||||||||||||||..(((((...........)))))((((((((.....))))))))........(((((((((((.((	0	0	0	0	0	0	0	0	0	0	0	0
199	.	(	.	(	..............((((......)))).....................((((((((((((((.....((((((((.....))).)))))))))))))))))))...|||||||||||||||||||||||||..(((((...........)))))((((((((.....))))))))........(((((((((((.(((	0	0	0	0	0	0	0	0	0	0	0	0
200	.	.	.	.	..............((((......)))).....................((((((((((((((.....((((((((.....))).)))))))))))))))))))...|||||||||||||||||||||||||..(((((...........)))))((((((((.....))))))))........(((((((((((.(((.	0	0	0	0	0	0	0	0	0	0	0	0
201	.	.	.	.	..............((((......)))).....................((((((((((((((.....((((((((.....))).)))))))))))))))))))...|||||||||||||||||||||||||..(((((...........)))))((((((((.....))))))))........(((((((((((.(((..	0	0	0	0	0	0	0	0	0	0	0	0
202	.	.	.	.	..............((((......)))).....................((((((((((((((.....((((((((.....))).)))))))))))))))))))...|||||||||||||||||||||||||..(((((...........)))))((((((((.....))))))))........(((((((((((.(((...	0	0	0	0	0	0	0	0	0	0	0	0
203	.	.	.	.	..............((((......)))).....................((((((((((((((.....((((((((.....))).)))))))))))))))))))...|||||||||||||||||||||||||..(((((...........)))))((((((((.....))))))))........(((((((((((.(((....	0	0	0	0	0	0	0	0	0	0	0	0
204	.	.	.	.	..............((((......)))).....................((((((((((((((.....((((((((.....))).)))))))))))))))))))...|||||||||||||||||||||||||..(((((...........)))))((((((((.....))))))))........(((((((((((.(((.....	0	0	0	0	0	0	0	0	0	0	0	0
205	.	)	.	)	..............((((......)))).....................((((((((((((((.....((((((((.....))).)))))))))))))))))))...|||||||||||||||||||||||||..(((((...........)))))((((((((.....))))))))........(((((((((((.(((.....)	0	0	0	0	0	0	0	0	0	0	0	0
206	)	)	.	)	..............((((......)))).....................((((((((((((((.....((((((((.....))).)))))))))))))))))))...|||||||||||||||||||||||||..(((((...........)))))((((((((.....))))))))........(((((((((((.(((.....))	0	0	0	0	0	0	0	0	0	0	0	0
207	.	)	.	)	..............((((......)))).....................((((((((((((((.....((((((((.....))).)))))))))))))))))))...|||||||||||||||||||||||||..(((((...........)))))((((((((.....))))))))........(((((((((((.(((.....)))	0	0	0	0	0	0	0	0	0	0	0	0
208	)	)	.	)	..............((((......)))).....................((((((((((((((.....((((((((.....))).)))))))))))))))))))...|||||||||||||||||||||||||..(((((...........)))))((((((((.....))))))))........(((((((((((.(((.....))))	0	0	0	0	0	0	0	0	0	0	0	0
209	)	)	.	)	..............((((......)))).....................((((((((((((((.....((((((((.....))).)))))))))))))))))))...|||||||||||||||||||||||||..(((((...........)))))((((((((.....))))))))........(((((((((((.(((.....)))))	0	0	0	0	0	0	0	0	0	0	0	0
210	)	)	.	)	..............((((......)))).....................((((((((((((((.....((((((((.....))).)))))))))))))))))))...|||||||||||||||||||||||||..(((((...........)))))((((((((.....))))))))........(((((((((((.(((.....))))))	0	0	0	0	0	0	0	0	0	0	0	0
211	)	)	.	)	..............((((......)))).....................((((((((((((((.....((((((((.....))).)))))))))))))))))))...|||||||||||||||||||||||||..(((((...........)))))((((((((.....))))))))........(((((((((((.(((.....)))))))	0	0	0	0	0	0	0	0	0	0	0	0
212	)	)	.	)	..............((((......)))).....................((((((((((((((.....((((((((.....))).)))))))))))))))))))...|||||||||||||||||||||||||..(((((...........)))))((((((((.....))))))))........(((((((((((.(((.....))))))))	0	0	0	0	0	0	0	0	0	0	0	0
213	)	)	.	)	..............((((......)))).....................((((((((((((((.....((((((((.....))).)))))))))))))))))))...|||||||||||||||||||||||||..(((((...........)))))((((((((.....))))))))........(((((((((((.(((.....)))))))))	0	0	0	0	0	0	0	0	0	0	0	0
214	)	)	.	)	..............((((......)))).....................((((((((((((((.....((((((((.....))).)))))))))))))))))))...|||||||||||||||||||||||||..(((((...........)))))((((((((.....))))))))........(((((((((((.(((.....))))))))))	0	0	0	0	0	0	0	0	0	0	0	0
215	)	)	.	)	..............((((......)))).....................((((((((((((((.....((((((((.....))).)))))))))))))))))))...|||||||||||||||||||||||||..(((((...........)))))((((((((.....))))))))........(((((((((((.(((.....)))))))))))	0	0	0	0	0	0	0	0	0	0	0	0
216	)	)	.	)	..............((((......)))).....................((((((((((((((.....((((((((.....))).)))))))))))))))))))...|||||||||||||||||||||||||..(((((...........)))))((((((((.....))))))))........(((((((((((.(((.....))))))))))))	0	0	0	0	0	0	0	0	0	0	0	0
217	)	)	.	)	..............((((......)))).....................((((((((((((((.....((((((((.....))).)))))))))))))))))))...|||||||||||||||||||||||||..(((((...........)))))((((((((.....))))))))........(((((((((((.(((.....)))))))))))))	0	0	0	0	0	0	0	0	0	0	0	0
218	.	)	.	)	..............((((......)))).....................((((((((((((((.....((((((((.....))).)))))))))))))))))))...|||||||||||||||||||||||||..(((((...........)))))((((((((.....))))))))........(((((((((((.(((.....))))))))))))))	0	0	0	0	0	0	0	0	0	0	0	0
219	.	.	.	.	..............((((......)))).....................((((((((((((((.....((((((((.....))).)))))))))))))))))))...|||||||||||||||||||||||||..(((((...........)))))((((((((.....))))))))........(((((((((((.(((.....)))))))))))))).	0	0	0	0	0	0	0	0	0	0	0	0
220	)	.	.	.	..............((((......)))).....................((((((((((((((.....((((((((.....))).)))))))))))))))))))...|||||||||||||||||||||||||..(((((...........)))))((((((((.....))))))))........(((((((((((.(((.....))))))))))))))..	0	0	0	0	0	0	0	0	0	0	0	0
221	)	.	.	.	..............((((......)))).....................((((((((((((((.....((((((((.....))).)))))))))))))))))))...|||||||||||||||||||||||||..(((((...........)))))((((((((.....))))))))........(((((((((((.(((.....))))))))))))))...	0	0	0	0	0	0	0	0	0	0	0	0
222	)	.	.	.	..............((((......)))).....................((((((((((((((.....((((((((.....))).)))))))))))))))))))...|||||||||||||||||||||||||..(((((...........)))))((((((((.....))))))))........(((((((((((.(((.....))))))))))))))....	0	0	0	0	0	0	0	0	0	0	0	0
223	)	.	.	.	..............((((......)))).....................((((((((((((((.....((((((((.....))).)))))))))))))))))))...|||||||||||||||||||||||||..(((((...........)))))((((((((.....))))))))........(((((((((((.(((.....)))))))))))))).....	0	0	0	0	0	0	0	0	0	0	0	0
224	)	.	.	.	..............((((......)))).....................((((((((((((((.....((((((((.....))).)))))))))))))))))))...|||||||||||||||||||||||||..(((((...........)))))((((((((.....))))))))........(((((((((((.(((.....))))))))))))))......	0	0	0	0	0	0	0	0	0	0	0	0
225	)	.	.	.	..............((((......)))).....................((((((((((((((.....((((((((.....))).)))))))))))))))))))...|||||||||||||||||||||||||..(((((...........)))))((((((((.....))))))))........(((((((((((.(((.....)))))))))))))).......	0	0	0	0	0	0	0	0	0	0	0	0
226	)	.	.	.	..............((((......)))).....................((((((((((((((.....((((((((.....))).)))))))))))))))))))...|||||||||||||||||||||||||..(((((...........)))))((((((((.....))))))))........(((((((((((.(((.....))))))))))))))........	0	0	0	0	0	0	0	0	0	0	0	0
227	)	.	.	.	..............((((......)))).....................((((((((((((((.....((((((((.....))).)))))))))))))))))))...|||||||||||||||||||||||||..(((((...........)))))((((((((.....))))))))........(((((((((((.(((.....)))))))))))))).........	0	0	0	0	0	0	0	0	0	0	0	0
228	.	.	.	.	..............((((......)))).....................((((((((((((((.....((((((((.....))).)))))))))))))))))))...|||||||||||||||||||||||||..(((((...........)))))((((((((.....))))))))........(((((((((((.(((.....))))))))))))))..........	0	0	0	0	0	0	0	0	0	0	0	0
229	.	.	.	.	..............((((......)))).....................((((((((((((((.....((((((((.....))).)))))))))))))))))))...|||||||||||||||||||||||||..(((((...........)))))((((((((.....))))))))........(((((((((((.(((.....))))))))))))))...........	0	0	0	0	0	0	0	0	0	0	0	0
230	)	.	.	.	..............((((......)))).....................((((((((((((((.....((((((((.....))).)))))))))))))))))))...|||||||||||||||||||||||||..(((((...........)))))((((((((.....))))))))........(((((((((((.(((.....))))))))))))))............	0	0	0	0	0	0	0	0	0	0	0	0
231	)	.	.	.	..............((((......)))).....................((((((((((((((.....((((((((.....))).)))))))))))))))))))...|||||||||||||||||||||||||..(((((...........)))))((((((((.....))))))))........(((((((((((.(((.....)))))))))))))).............	0	0	0	0	0	0	0	0	0	0	0	0
232	)	.	.	.	..............((((......)))).....................((((((((((((((.....((((((((.....))).)))))))))))))))))))...|||||||||||||||||||||||||..(((((...........)))))((((((((.....))))))))........(((((((((((.(((.....))))))))))))))..............	0	0	0	0	0	0	0	0	0	0	0	0
233	)	.	.	.	..............((((......)))).....................((((((((((((((.....((((((((.....))).)))))))))))))))))))...|||||||||||||||||||||||||..(((((...........)))))((((((((.....))))))))........(((((((((((.(((.....))))))))))))))...............	0	0	0	0	0	0	0	0	0	0	0	0
234	.	.	.	.	..............((((......)))).....................((((((((((((((.....((((((((.....))).)))))))))))))))))))...|||||||||||||||||||||||||..(((((...........)))))((((((((.....))))))))........(((((((((((.(((.....))))))))))))))................	0	0	0	0	0	0	0	0	0	0	0	0
235	.	.	.	.	..............((((......)))).....................((((((((((((((.....((((((((.....))).)))))))))))))))))))...|||||||||||||||||||||||||..(((((...........)))))((((((((.....))))))))........(((((((((((.(((.....)))))))))))))).................	0	0	0	0	0	0	0	0	0	0	0	0
236	.	.	.	.	..............((((......)))).....................((((((((((((((.....((((((((.....))).)))))))))))))))))))...|||||||||||||||||||||||||..(((((...........)))))((((((((.....))))))))........(((((((((((.(((.....))))))))))))))..................	0	0	0	0	0	0	0	0	0	0	0	0
237	.	.	.	.	..............((((......)))).....................((((((((((((((.....((((((((.....))).)))))))))))))))))))...|||||||||||||||||||||||||..(((((...........)))))((((((((.....))))))))........(((((((((((.(((.....))))))))))))))...................	0	0	0	0	0	0	0	0	0	0	0	0

[truncated: 12 more sheets: HTT e12 - 2ry Str + Mask , HTT e12 - HSF3.0, HTT e12 - Analysis, LMNA e11 - 2ry Str + Mask, LMNA e11 - HSF3.0, LMNA e11 - Analysis, USH2A e13 (A) - 2ry Str + Mask , USH2A e13 (A) - HSF3.0, USH2A e13 (A) - Analysis, USH2A e13 (B) - 2ry Str + Mask, USH2A e13 (B) - HSF3.0, USH2A e13 (B) - Analysis]
